# Supplementary material for: Tin powder-promoted one-pot synthesis of 3-spiro-fused or 3,3′-disubstituted 2-oxindoles
Source: Royal Society of Chemistry journal article supplement (doi:10.1039/c6ob01487a), 2016-01-01

## Supporting Information

### Tin Powder-Promoted One-Pot Synthesis of 3-Spiro-Fused or 3,3'-Disubstituted 2-Oxindoles

Juanjuan Wang,<sup>a</sup> Danfeng Huang,<sup>\*a</sup> Ke-Hu Wang,<sup>a</sup> Xiansha Peng,<sup>a</sup> Yingpeng Su,<sup>a</sup> Yulai Hu,<sup>\*a,b</sup> and Ying Fu<sup>a</sup>

<sup>a</sup>College of Chemistry and Chemical Engineering, Northwest Normal University, 967 Anning East Road, Lanzhou 730070, China

<sup>b</sup>State Key Laboratory of Applied Organic Chemistry, Lanzhou University, Lanzhou 730000, China.

E-mail: huyl@nwnu.edu.cn, huangdf@nwnu.edu.cn.

#### Table of Contents

|                                                                                                                  |     |
|------------------------------------------------------------------------------------------------------------------|-----|
| 1. General methods .....                                                                                         | S3  |
| 2. General experimental procedures for the synthesis of compounds <b>4a–4x</b> .....                             | S3  |
| 3. General experimental procedures for the synthesis of compounds <b>6a–6s</b> .....                             | S6  |
| 4. NMR and HRMS Spectra of compounds <b>4</b> and <b>6</b> .....                                                 | S11 |
| N-(4'-Methylene-2,5'-dioxospiro[indoline-3,2'-pyrrolidin]-1'-yl)benzamide ( <b>4a</b> ) .....                    | S11 |
| 2-Methyl-N-(4'-methylene-2,5'-dioxospiro[indoline-3,2'-pyrrolidin]-1'-yl)benzamide ( <b>4b</b> ).....            | S13 |
| 3-Methyl-N-(4'-methylene-2,5'-dioxospiro[indoline-3,2'-pyrrolidin]-1'-yl)benzamide ( <b>4c</b> ) .....           | S15 |
| 4-Methyl-N-(4'-methylene-2,5'-dioxospiro[indoline-3,2'-pyrrolidin]-1'-yl)benzamide ( <b>4d</b> ).....            | S17 |
| 4-Methoxy-N-(4'-methylene-2,5'-dioxospiro[indoline-3,2'-pyrrolidin]-1'-yl)benzamide ( <b>4e</b> ) .....          | S19 |
| 2-Chloro-N-(4'-methylene-2,5'-dioxospiro[indoline-3,2'-pyrrolidin]-1'-yl)benzamide ( <b>4h</b> ).....            | S21 |
| 3-Chloro-N-(4'-methylene-2,5'-dioxospiro[indoline-3,2'-pyrrolidin]-1'-yl)benzamide ( <b>4i</b> ).....            | S23 |
| 4-Chloro-N-(4'-methylene-2,5'-dioxospiro[indoline-3,2'-pyrrolidin]-1'-yl)benzamide ( <b>4j</b> ).....            | S25 |
| 4-Bromo-N-(4'-methylene-2,5'-dioxospiro[indoline-3,2'-pyrrolidin]-1'-yl)benzamide ( <b>4k</b> ).....             | S27 |
| 4-Fluoro-N-(4'-methylene-2,5'-dioxospiro[indoline-3,2'-pyrrolidin]-1'-yl)benzamide ( <b>4l</b> ) .....           | S29 |
| Methyl 4-((4'-methylene-2,5'-dioxospiro[indoline-3,2'-pyrrolidin]-1'-yl)carbamoyl)benzoate ( <b>4n</b> ) .....   | S31 |
| N-(4'-Methylene-2,5'-dioxospiro[indoline-3,2'-pyrrolidin]-1'-yl)-4-(trifluoromethyl)benzamide ( <b>4o</b> )..... | S33 |
| 4-Chloro-N-(5-methyl-4'-methylene-2,5'-dioxospiro[indoline-3,2'-pyrrolidin]-1'-yl)benzamide ( <b>4q</b> ).....   | S35 |
| 4-Chloro-N-(5-chloro-4'-methylene-2,5'-dioxospiro[indoline-3,2'-pyrrolidin]-1'-yl)benzamide ( <b>4r</b> ) .....  | S37 |
| N-(1-Benzyl-4'-methylene-2,5'-dioxospiro[indoline-3,2'-pyrrolidin]-1'-yl)-4-chlorobenzamide ( <b>4s</b> ).....   | S39 |
| N-(1-Butyl-4'-methylene-2,5'-dioxospiro[indoline-3,2'-pyrrolidin]-1'-yl)-4-chlorobenzamide ( <b>4t</b> ).....    | S41 |
| N-(4'-Methylene-2,5'-dioxospiro[indoline-3,2'-pyrrolidin]-1'-yl)furan-2-carboxamide ( <b>4u</b> ).....           | S43 |
| N-(4'-Methylene-2,5'-dioxospiro[indoline-3,2'-pyrrolidin]-1'-yl)-2-naphthamide ( <b>4v</b> ) .....               | S45 |
| N-(4'-Methylene-2,5'-dioxospiro[indoline-3,2'-pyrrolidin]-1'-yl)dodecanamide ( <b>4w</b> ).....                  | S48 |
| N-(4'-Methylene-2,5'-dioxospiro[indoline-3,2'-pyrrolidin]-1'-yl)stearamide ( <b>4x</b> ).....                    | S50 |
| Ethyl 2-((2-oxo-3-(phenylamino)indolin-3-yl)methyl)acrylate ( <b>6a</b> ).....                                   | S52 |
| Ethyl 2-((2-oxo-3-(phenylamino)indolin-3-yl)methyl)acrylate ( <b>6b</b> ) .....                                  | S54 |
| Ethyl 2-((2-oxo-3-(m-tolylamino)indolin-3-yl)methyl)acrylate ( <b>6c</b> ) .....                                 | S56 |
| Ethyl 2-((2-oxo-3-(p-tolylamino)indolin-3-yl)methyl)acrylate ( <b>6d</b> ).....                                  | S58 |
| Ethyl 2-((3-((4-methoxyphenyl)amino)-2-oxoindolin-3-yl)methyl)acrylate ( <b>6e</b> ) .....                       | S60 |
| Ethyl 2-((3-((2,6-dimethylphenyl)amino)-2-oxoindolin-3-yl)methyl)acrylate ( <b>6f</b> ).....                     | S62 |
| Ethyl 2-((3-((4-fluorophenyl)amino)-2-oxoindolin-3-yl)methyl)acrylate ( <b>6h</b> ).....                         | S64 |
| Ethyl 2-((2-oxo-3-((4-(trifluoromethyl)phenyl)amino)indolin-3-yl)methyl)acrylate ( <b>6i</b> ) .....             | S66 |
| Ethyl 2-((3-((4-chlorophenyl)amino)-2-oxoindolin-3-yl)methyl)acrylate ( <b>6j</b> ) .....                        | S68 |
| Ethyl 2-((3-((4-bromophenyl)amino)-2-oxoindolin-3-yl)methyl)acrylate ( <b>6k</b> ).....                          | S70 |

|                                                                                                    |     |
|----------------------------------------------------------------------------------------------------|-----|
| Ethyl 2-((3-((4-fluorophenyl)amino)-5-methyl-2-oxoindolin-3-yl)methyl)acrylate ( <b>6m</b> ) ..... | S72 |
| Ethyl 2-((5-chloro-3-((4-fluorophenyl)amino)-2-oxoindolin-3-yl)methyl)acrylate ( <b>6n</b> ) ..... | S74 |
| Ethyl 2-((5-bromo-3-((4-fluorophenyl)amino)-2-oxoindolin-3-yl)methyl)acrylate ( <b>6o</b> ).....   | S76 |
| Ethyl 2-((3-(naphthalen-2-ylamino)-2-oxoindolin-3-yl)methyl)acrylate ( <b>6p</b> ).....            | S78 |
| Ethyl 2-((1-benzyl-3-((4-fluorophenyl)amino)-2-oxoindolin-3-yl)methyl)acrylate ( <b>6q</b> ).....  | S80 |
| Ethyl 2-((1-ethyl-3-((4-fluorophenyl)amino)-2-oxoindolin-3-yl)methyl)acrylate ( <b>6r</b> ).....   | S82 |
| Ethyl 2-((1-butyl-3-((4-fluorophenyl)amino)-2-oxoindolin-3-yl)methyl)acrylate ( <b>6s</b> ) .....  | S84 |

## Experimental Section

### 1 General

Flash chromatography was performed using silica gel 60 (230-400 mesh). Analytical thin layer chromatography (TLC) was done using Qingdao silica Gel (silica gel GF254). TLC plates were analyzed by an exposure to ultraviolet (UV) light and/or submersion in phosphomolybdic acid solution or in I<sub>2</sub> vapor. IR spectra were obtained using an Alpha Centauri FT-IR spectrophotometer and absorption frequencies were reported in reciprocal centimetres (cm<sup>-1</sup>). High-resolution mass spectra were recorded on a Bruker APEX II Fourier transform ion cyclotron resonance mass spectrometer. <sup>1</sup>H NMR and <sup>13</sup>C NMR spectra were recorded on Varian Mercury 400 plus or Agilent DD2 600 instrument in CDCl<sub>3</sub> or (CD<sub>3</sub>)<sub>2</sub>SO solution using TMS as an internal standard. The following abbreviations are used for the multiplicities: s = singlet, d = doublet, dd = doublet of doublet, t = triplet, q = quadruplet, m = multiplet, br = broad signal for proton spectra; coupling constants (*J*) are reported in Hertz (Hz). Melting points were determined on a Beijing Taike X-4 apparatus and were uncorrected. The solvents were distilled by standard methods. Reagents were obtained from commercial suppliers and used without further purification unless otherwise noted.

### 2 General Experimental Procedures for the Synthesis of Compounds 4a–4x.

Isatins **1** (0.5 mmol, 1 equiv.), hydrazides **2** (0.5 mmol, 1.0 equiv.) and TfOH (0.05 mmol, 0.1 equiv.) were put into a dried roundbottom flask (50 mL) fitted with a magnetic bar. THF (4 mL) was then added. The mixture was stirred under reflux, and the reaction process was monitored by TLC. After formation of benzoyl hydrazone, tin powder (1.75 mmol, 3.5 equiv.) and ethyl 2-(bromomethyl)acrylate **3** (1.5 mmol, 3 equiv.) in 2 mL of THF were added to the flask. The resulting mixture was stirred under reflux for 3–13 h. The reaction mixture was cooled to room temperature. The saturated NH<sub>4</sub>Cl solution (6 mL) was poured into the mixture and stirred for 10 min. The mixture was extracted with EtOAc (3 × 10 mL). The combined organic phases were dried (MgSO<sub>4</sub>) and concentrated. Purification of the residue by silica gel column chromatography using hexane and EtOAc (1:1) as the eluent furnished the pure products compounds **4**.

***N*-(4'-Methylene-2,5'-dioxospiro[indoline-3,2'-pyrrolidin]-1'-yl)benzamide (4a)**. White solid, 143 mg, yield 86%. m.p. 251–253 °C; IR (KBr)  $\nu$  3406, 2986, 1656, 1404, 1308, 1017 cm<sup>-1</sup>; <sup>1</sup>H NMR (600 MHz, (CD<sub>3</sub>)<sub>2</sub>SO)  $\delta$  10.67 (s, 1H), 10.62 (s, 1H), 7.66 (d, *J* = 7.8 Hz, 2H), 7.51 (t, *J* = 7.8 Hz, 1H), 7.39–7.38 (m, 3H), 7.20 (t, *J* = 7.8 Hz, 1H), 6.94 (t, *J* = 7.8 Hz, 1H), 6.81 (d, *J* = 7.2 Hz, 1H), 6.00 (s, 1H), 5.56 (s, 1H), 3.16 (d, *J* = 17.4 Hz, 1H), 3.07 (d, *J* = 16.8 Hz, 1H); <sup>13</sup>C NMR (150 MHz, (CD<sub>3</sub>)<sub>2</sub>SO)  $\delta$  176.2, 165.6, 165.1, 142.6, 136.0, 132.0, 131.7, 130.1, 128.3, 127.6, 126.2, 125.8, 121.8, 116.9, 109.8, 66.6, 35.5; HRMS (ESI–TOF) *m/z* calcd for C<sub>19</sub>H<sub>15</sub>N<sub>3</sub>NaO<sub>3</sub> [M+Na<sup>+</sup>] 356.1006, Found: 356.0999.

**2-Methyl-*N*-(4'-methylene-2,5'-dioxospiro[indoline-3,2'-pyrrolidin]-1'-yl)benzamide (4b)**. White solid, 101 mg, White solid, yield 58%. m.p. 229–231 °C; IR (KBr)  $\nu$  3406, 2236, 1719, 1002, 753 cm<sup>-1</sup>; <sup>1</sup>H NMR (600 MHz, (CD<sub>3</sub>)<sub>2</sub>SO)  $\delta$  10.62 (s, 1H), 10.46 (s, 1H), 7.40 (d, *J* = 7.8 Hz, 1H), 7.28 (t, *J* = 7.8 Hz, 2H), 7.14 (t, *J* = 7.2 Hz, 2H), 7.00–6.98 (m, 2H), 6.85 (d, *J* = 7.8 Hz, 1H), 6.00 (s, 1H), 5.56 (s, 1H), 3.14 (d, *J* = 16.8 Hz, 1H), 3.08 (d, *J* = 17.4 Hz, 1H), 1.92 (s, 3H); <sup>13</sup>C NMR (150 MHz, (CD<sub>3</sub>)<sub>2</sub>SO)  $\delta$  176.2, 167.7, 164.9, 142.9, 136.1, 135.5, 134.2, 130.3, 130.2, 129.9, 127.2, 126.1, 126.0, 125.3, 121.8, 116.9, 109.8, 66.4, 35.1, 18.5; HRMS (ESI–TOF) *m/z* calcd for C<sub>20</sub>H<sub>17</sub>N<sub>3</sub>NaO<sub>3</sub> [M+Na<sup>+</sup>] 370.1162, Found: 370.1154.

**3-Methyl-*N*-(4'-methylene-2,5'-dioxospiro[indoline-3,2'-pyrrolidin]-1'-yl)benzamide (4c)**. White solid, 121 mg, yield 70%. m.p. 256–258 °C; IR (KBr)  $\nu$  3406, 2986, 1656, 1404, 1308, 1017 cm<sup>-1</sup>; <sup>1</sup>H NMR (600 MHz, (CD<sub>3</sub>)<sub>2</sub>SO)  $\delta$  10.62 (s, 1H), 10.60 (s, 1H), 7.52 (s, 1H), 7.46 (d, *J* = 7.2 Hz, 1H), 7.39 (d,

$J = 7.2$  Hz, 1H), 7.31 (d,  $J = 7.8$  Hz, 1H), 7.26 (t,  $J = 7.2$  Hz, 1H), 7.21 (t,  $J = 7.8$  Hz, 1H), 6.94 (t,  $J = 7.2$  Hz, 1H), 6.81 (d,  $J = 7.8$  Hz, 1H), 6.00 (s, 1H), 5.55 (s, 1H), 3.15 (d,  $J = 16.8$  Hz, 1H), 3.06 (d,  $J = 17.4$  Hz, 1H), 2.28 (s, 3H);  $^{13}\text{C}$  NMR (150 MHz,  $(\text{CD}_3)_2\text{SO}$ )  $\delta$  176.2, 165.5, 165.0, 142.6, 137.6, 136.0, 132.6, 131.6, 130.1, 128.2, 128.1, 126.2, 125.8, 124.8, 121.8, 116.8, 109.7, 66.6, 35.6, 20.8; HRMS (ESI-TOF)  $m/z$  calcd for  $\text{C}_{20}\text{H}_{17}\text{N}_3\text{NaO}_3$   $[\text{M}+\text{Na}^+]$  370.1162, Found: 370.1155.

**4-Methyl-*N*-(4'-methylene-2,5'-dioxospiro[indoline-3,2'-pyrrolidin]-1'-yl)benzamide (4d).** White solid, 137 mg, yield 79%. m.p. 248–250 °C; IR (KBr)  $\nu$  3412, 2236, 1653, 1020, 753  $\text{cm}^{-1}$ ;  $^1\text{H}$  NMR (600 MHz,  $(\text{CD}_3)_2\text{SO}$ )  $\delta$  10.61 (s, 1H), 10.58 (s, 1H), 7.58 (d,  $J = 8.4$  Hz, 2H), 7.38 (d,  $J = 7.2$  Hz, 1H), 7.21–7.18 (m, 3H), 6.93 (t,  $J = 7.8$  Hz, 1H), 6.81 (d,  $J = 7.8$  Hz, 1H), 6.00 (s, 1H), 5.55 (s, 1H), 3.15 (d,  $J = 16.8$  Hz, 1H), 3.06 (d,  $J = 16.8$  Hz, 1H), 2.29 (s, 3H);  $^{13}\text{C}$  NMR (150 MHz,  $(\text{CD}_3)_2\text{SO}$ )  $\delta$  176.2, 165.4, 165.1, 142.6, 142.1, 136.0, 130.1, 128.8, 128.8, 127.7, 126.2, 125.8, 121.8, 116.8, 109.7, 66.6, 35.5, 21.0; HRMS (ESI-TOF)  $m/z$  calcd for  $\text{C}_{20}\text{H}_{17}\text{N}_3\text{NaO}_3$   $[\text{M}+\text{Na}^+]$  370.1162, Found: 370.1154.

**4-Methoxy-*N*-(4'-methylene-2,5'-dioxospiro[indoline-3,2'-pyrrolidin]-1'-yl)benzamide (4e).** White solid 142 mg, yield 78%. m.p. 258–258 °C; IR (KBr)  $\nu$  3412, 2236, 1719, 1470, 1248, 1002, 753  $\text{cm}^{-1}$ ;  $^1\text{H}$  NMR (600 MHz,  $(\text{CD}_3)_2\text{SO}$ )  $\delta$  10.61 (s, 1H), 10.49 (s, 1H), 7.68 (s, 1H), 7.66 (s, 1H), 7.38 (d,  $J = 7.2$  Hz, 1H), 7.20 (t,  $J = 7.8$  Hz, 1H), 6.95–6.91 (m, 3H), 6.80 (d,  $J = 7.8$  Hz, 1H), 5.99 (s, 1H), 5.55 (s, 1H), 3.76 (s, 3H), 3.15 (d,  $J = 17.4$  Hz, 1H), 3.05 (d,  $J = 17.4$  Hz, 1H);  $^{13}\text{C}$  NMR (150 MHz,  $(\text{CD}_3)_2\text{SO}$ )  $\delta$  176.2, 165.2, 164.9, 162.1, 142.6, 136.1, 130.0, 129.6, 126.3, 125.8, 123.8, 121.8, 116.7, 113.5, 109.7, 66.6, 55.4, 35.6; HRMS (ESI-TOF)  $m/z$  calcd for  $\text{C}_{20}\text{H}_{17}\text{N}_3\text{NaO}_4$   $[\text{M}+\text{Na}^+]$  386.1111, Found: 386.1105.

**2-Chloro-*N*-(4'-methylene-2,5'-dioxospiro[indoline-3,2'-pyrrolidin]-1'-yl)benzamide (4h).** White solid, 152 mg, yield 83%. m.p. 148–150 °C; IR (KBr)  $\nu$  3406, 2158, 1656, 999, 753  $\text{cm}^{-1}$ ;  $^1\text{H}$  NMR (600 MHz,  $(\text{CD}_3)_2\text{SO}$ )  $\delta$  10.67 (s, 1H), 10.63 (s, 1H), 7.41–7.36 (m, 3H), 7.32 (t,  $J = 7.2$  Hz, 1H), 7.27 (t,  $J = 7.8$  Hz, 1H), 7.09 (d,  $J = 7.2$  Hz, 1H), 6.98 (t,  $J = 7.2$  Hz, 1H), 6.84 (d,  $J = 7.8$  Hz, 1H), 6.01 (s, 1H), 5.57 (s, 1H), 3.14 (d,  $J = 16.8$  Hz, 1H), 3.08 (d,  $J = 17.4$  Hz, 1H);  $^{13}\text{C}$  NMR (150 MHz,  $(\text{CD}_3)_2\text{SO}$ )  $\delta$  176.1, 165.0, 164.9, 142.4, 135.9, 134.0, 131.4, 130.1, 130.1, 129.5, 129.0, 126.8, 126.0, 125.9, 121.9, 117.0, 109.7, 66.4, 35.1; HRMS (ESI-TOF)  $m/z$  calcd for  $\text{C}_{19}\text{H}_{15}\text{ClN}_3\text{O}_3$   $[\text{M}+\text{H}^+]$  368.0796, Found: 368.0799.

**3-Chloro-*N*-(4'-methylene-2,5'-dioxospiro[indoline-3,2'-pyrrolidin]-1'-yl)benzamide (4i).** White solid, 156 mg, yield 85%. m.p. 271–273 °C; IR (KBr)  $\nu$  3406, 2992, 2122, 1656, 1404, 1308, 1017  $\text{cm}^{-1}$ ;  $^1\text{H}$  NMR (600 MHz,  $(\text{CD}_3)_2\text{SO}$ )  $\delta$  10.80 (s, 1H), 10.65 (s, 1H), 7.70 (s, 1H), 7.63 (d,  $J = 7.8$  Hz, 1H), 7.60 (d,  $J = 7.2$  Hz, 1H), 7.44 (t,  $J = 7.8$  Hz, 1H), 7.37 (d,  $J = 7.2$  Hz, 1H), 7.22 (t,  $J = 7.8$  Hz, 1H), 6.95 (t,  $J = 7.8$  Hz, 1H), 6.82 (d,  $J = 7.8$  Hz, 1H), 6.01 (s, 1H), 5.57 (s, 1H), 3.16 (d,  $J = 16.8$  Hz, 1H), 3.07 (d,  $J = 17.4$  Hz, 1H);  $^{13}\text{C}$  NMR (150 MHz,  $(\text{CD}_3)_2\text{SO}$ )  $\delta$  176.1, 165.0, 164.2, 142.6, 135.8, 133.5, 133.2, 131.9, 130.4, 130.2, 127.3, 126.4, 126.1, 125.7, 121.8, 117.1, 109.8, 66.5, 35.5; HRMS (ESI-TOF)  $m/z$  calcd for  $\text{C}_{19}\text{H}_{14}\text{ClN}_3\text{NaO}_3$   $[\text{M}+\text{Na}^+]$  390.0616, Found: 390.0607.

**4-Chloro-*N*-(4'-methylene-2,5'-dioxospiro[indoline-3,2'-pyrrolidin]-1'-yl)benzamide (4j).** White solid, 167 mg, yield 91%. m.p. 285–287 °C; IR (KBr)  $\nu$  3406, 2992, 1656, 1404, 1308, 1017  $\text{cm}^{-1}$ ;  $^1\text{H}$  NMR (600 MHz,  $(\text{CD}_3)_2\text{SO}$ )  $\delta$  10.76 (s, 1H), 10.63 (s, 1H), 7.67 (d,  $J = 8.4$  Hz, 2H), 7.47 (d,  $J = 8.4$  Hz, 2H), 7.37 (d,  $J = 7.8$  Hz, 1H), 7.21 (t,  $J = 7.8$  Hz, 1H), 6.94 (t,  $J = 7.8$  Hz, 1H), 6.81 (d,  $J = 7.2$  Hz, 1H), 6.00 (s, 1H), 5.56 (s, 1H), 3.16 (d,  $J = 16.8$  Hz, 1H), 3.07 (d,  $J = 17.4$  Hz, 1H);  $^{13}\text{C}$  NMR (150 MHz,  $(\text{CD}_3)_2\text{SO}$ )  $\delta$  176.1, 165.0, 164.6, 142.6, 136.9, 135.9, 130.3, 130.1, 129.5, 128.5, 126.1, 125.7, 121.8, 117.0, 109.8, 66.6, 35.5; HRMS (ESI-TOF)  $m/z$  calcd for  $\text{C}_{19}\text{H}_{14}\text{ClN}_3\text{NaO}_3$   $[\text{M}+\text{Na}^+]$  390.0616, Found: 386.0608.

**4-Bromo-*N*-(4'-methylene-2,5'-dioxospiro[indoline-3,2'-pyrrolidin]-1'-yl)benzamide (4k).** White solid, 146 mg, yield 71%. m.p. 269–271 °C; IR (KBr)  $\nu$  3117, 1713, 1407, 1194, 745, 654  $\text{cm}^{-1}$ ;  $^1\text{H}$  NMR (600 MHz,  $(\text{CD}_3)_2\text{SO}$ )  $\delta$  10.77 (s, 1H), 10.63 (s, 1H), 7.61 (dd,  $J = 13.2$ ,  $J = 9.0$  Hz, 4H), 7.36 (d,  $J = 7.8$  Hz, 1H), 7.20 (t,  $J = 7.8$  Hz, 1H), 6.94 (t,  $J = 7.8$  Hz, 1H), 6.81 (d,  $J = 7.8$  Hz, 1H), 6.00 (s, 1H), 5.56 (s,

1H), 3.16 (d,  $J = 17.4$  Hz, 1H), 3.07 (d,  $J = 17.4$  Hz, 1H);  $^{13}\text{C}$  NMR (150 MHz,  $(\text{CD}_3)_2\text{SO}$ )  $\delta$  176.1, 165.0, 164.7, 142.6, 135.9, 131.4, 130.7, 130.1, 129.7, 126.1, 125.9, 125.7, 121.8, 117.0, 109.7, 66.6, 35.5; HRMS (ESI-TOF)  $m/z$  calcd for  $\text{C}_{19}\text{H}_{15}\text{BrN}_3\text{O}_3$   $[\text{M}+\text{H}^+]$  412.0291, Found: 412.0281.

**4-Fluoro-*N*-(4'-methylene-2,5'-dioxospiro[indoline-3,2'-pyrrolidin]-1'-yl)benzamide (4l).** White solid, 144 mg, yield 82%. m.p. 268–270 °C; IR (KBr)  $\nu$  3406, 2236, 1716, 1275, 1020, 753  $\text{cm}^{-1}$ ;  $^1\text{H}$  NMR (600 MHz,  $(\text{CD}_3)_2\text{SO}$ )  $\delta$  10.70 (s, 1H), 10.63 (s, 1H), 7.75 (s, 2H), 7.38 (d,  $J = 7.2$  Hz, 1H), 7.25–7.20 (m, 3H), 6.94 (t,  $J = 7.2$  Hz, 1H), 6.81 (d,  $J = 7.2$  Hz, 1H), 6.00 (s, 1H), 5.57 (s, 1H), 3.16 (d,  $J = 17.4$  Hz, 1H), 3.07 (d,  $J = 16.8$  Hz, 1H);  $^{13}\text{C}$  NMR (100 MHz,  $(\text{CD}_3)_2\text{SO}$ )  $\delta$  176.2, 165.1, 164.5, 164.3 (d,  $J_{\text{C-F}} = 249.0$  Hz), 142.6, 135.9, 130.4 (d,  $J_{\text{C-F}} = 10.0$  Hz), 130.1, 128.1, 126.2, 125.7, 121.8, 117.0, 115.4 (d,  $J_{\text{C-F}} = 22.0$  Hz), 109.8, 66.6, 35.5; HRMS (ESI-TOF)  $m/z$  calcd for  $\text{C}_{19}\text{H}_{14}\text{FN}_3\text{NaO}_3$   $[\text{M}+\text{Na}^+]$  374.0911, Found: 374.0901.

**Methyl 4-((4'-methylene-2,5'-dioxospiro[indoline-3,2'-pyrrolidin]-1'-yl)carbamoyl)benzoate (4n).** White solid, 170 mg, yield 87%. m.p. 270–272 °C; IR (KBr)  $\nu$  3273, 1724, 1618, 1470, 1281, 1110, 722, 613  $\text{cm}^{-1}$ ;  $^1\text{H}$  NMR (600 MHz,  $(\text{CD}_3)_2\text{SO}$ )  $\delta$  10.90 (s, 1H), 10.65 (s, 1H), 7.96 (d,  $J = 8.4$  Hz, 2H), 7.79–7.77 (m, 2H), 7.39 (s, 1H), 7.21 (t,  $J = 7.3$  Hz, 1H), 6.95 (t,  $J = 7.2$  Hz, 1H), 6.82 (d,  $J = 7.2$  Hz, 1H), 6.02 (s, 1H), 5.57 (s, 1H), 3.85 (d,  $J = 3.0$  Hz, 3H), 3.17 (d,  $J = 17.4$  Hz, 1H), 3.08 (d,  $J = 17.4$  Hz, 1H);  $^{13}\text{C}$  NMR (150 MHz,  $(\text{CD}_3)_2\text{SO}$ )  $\delta$  176.1, 165.5, 165.0, 164.9, 142.6, 135.8, 135.6, 132.5, 130.2, 129.1, 128.0, 126.1, 125.7, 121.8, 117.1, 109.8, 66.6, 52.4, 35.5; HRMS (ESI-TOF)  $m/z$  calcd for  $\text{C}_{21}\text{H}_{17}\text{N}_3\text{NaO}_5$   $[\text{M}+\text{Na}^+]$  414.1060, Found: 414.1061.

***N*-(4'-Methylene-2,5'-dioxospiro[indoline-3,2'-pyrrolidin]-1'-yl)-4-(trifluoromethyl)benzamide (4o).** White solid, 166 mg, yield 83%. m.p. 259–261 °C; IR (KBr)  $\nu$  3273, 1724, 1618, 1281, 1110, 722, 613  $\text{cm}^{-1}$ ;  $^1\text{H}$  NMR (600 MHz,  $(\text{CD}_3)_2\text{SO}$ )  $\delta$  10.96 (s, 1H), 10.67 (s, 1H), 7.85 (d,  $J = 8.4$  Hz, 2H), 7.80 (d,  $J = 8.4$  Hz, 2H), 7.40 (d,  $J = 7.2$  Hz, 1H), 7.22 (t,  $J = 7.2$  Hz, 1H), 6.96 (t,  $J = 7.2$  Hz, 1H), 6.84 (d,  $J = 7.8$  Hz, 1H), 6.03 (s, 1H), 5.59 (s, 1H), 3.19 (d,  $J = 16.8$  Hz, 1H), 3.10 (d,  $J = 16.8$  Hz, 1H);  $^{13}\text{C}$  NMR (150 MHz,  $(\text{CD}_3)_2\text{SO}$ )  $\delta$  176.1, 165.0, 164.6, 142.6, 135.8, 135.4, 131.8 (q,  $J_{\text{C-F}} = 31.5$  Hz), 130.2, 128.5, 126.0, 125.7, 125.4, 123.7 (q,  $J_{\text{C-F}} = 271.5$  Hz), 121.8, 117.1, 109.8, 66.6, 35.5; HRMS (ESI-TOF)  $m/z$  calcd for  $\text{C}_{20}\text{H}_{14}\text{F}_3\text{N}_3\text{NaO}_3$   $[\text{M}+\text{Na}^+]$  424.0879, Found: 424.0869.

**4-Chloro-*N*-(5-methyl-4'-methylene-2,5'-dioxospiro[indoline-3,2'-pyrrolidin]-1'-yl)benzamide (4q).** White solid, 162 mg, yield 85%. m.p. 233–235 °C; IR (KBr)  $\nu$  3406, 2986, 2902, 2194, 1653, 1404, 1305, 1017  $\text{cm}^{-1}$ ;  $^1\text{H}$  NMR (400 MHz,  $(\text{CD}_3)_2\text{SO}$ )  $\delta$  10.74 (s, 1H), 10.53 (s, 1H), 7.68 (d,  $J = 8.4$  Hz, 2H), 7.49 (d,  $J = 8.4$  Hz, 2H), 7.20 (s, 1H), 7.01 (d,  $J = 7.6$  Hz, 1H), 6.70 (d,  $J = 8.8$  Hz, 1H), 6.00 (s, 1H), 5.56 (s, 1H), 3.14 (d,  $J = 16.4$  Hz, 1H), 3.04 (d,  $J = 17.2$  Hz, 1H), 2.19 (s, 3H);  $^{13}\text{C}$  NMR (150 MHz,  $(\text{CD}_3)_2\text{SO}$ )  $\delta$  176.1, 165.0, 164.6, 140.1, 136.9, 135.9, 130.6, 130.4, 130.3, 129.6, 128.5, 126.3, 126.2, 117.0, 109.5, 66.6, 35.5, 20.7; HRMS (ESI-TOF)  $m/z$  calcd for  $\text{C}_{20}\text{H}_{16}\text{ClN}_3\text{NaO}_3$   $[\text{M}+\text{Na}^+]$  404.0772, Found: 404.0762.

**4-Chloro-*N*-(5-chloro-4'-methylene-2,5'-dioxospiro[indoline-3,2'-pyrrolidin]-1'-yl)benzamide (4r).** White solid, 140 mg, yield 70%. m.p. 240–242 °C; IR (KBr)  $\nu$  3436, 2248, 1737, 1656, 1293, 1026, 825, 762, 624  $\text{cm}^{-1}$ ;  $^1\text{H}$  NMR (600 MHz,  $(\text{CD}_3)_2\text{SO}$ )  $\delta$  10.83 (s, 1H), 10.78 (s, 1H), 7.70 (d,  $J = 8.4$  Hz, 2H), 7.50 (d,  $J = 8.4$  Hz, 2H), 7.42 (s, 1H), 7.27 (d,  $J = 8.4$  Hz, 1H), 6.83 (d,  $J = 8.4$  Hz, 1H), 6.02 (s, 1H), 5.58 (s, 1H), 3.17 (s, 2H);  $^{13}\text{C}$  NMR (150 MHz,  $(\text{CD}_3)_2\text{SO}$ )  $\delta$  175.8, 165.0, 164.8, 141.5, 137.1, 135.5, 130.2, 130.0, 129.5, 128.5, 128.1, 126.0, 125.7, 117.3, 111.2, 66.7, 35.1; HRMS (ESI-TOF)  $m/z$  calcd for  $\text{C}_{19}\text{H}_{13}\text{Cl}_2\text{N}_3\text{NaO}_3$   $[\text{M}+\text{Na}^+]$  424.0226, Found: 424.0217.

***N*-(1-Benzyl-4'-methylene-2,5'-dioxospiro[indoline-3,2'-pyrrolidin]-1'-yl)-4-chlorobenzamide (4s).** White solid, 153 mg, yield 67%. m.p. 271–273 °C; IR (KBr)  $\nu$  3256, 2989, 1690, 1615, 1489, 1364, 1272, 1097, 752  $\text{cm}^{-1}$ ;  $^1\text{H}$  NMR (400 MHz,  $(\text{CD}_3)_2\text{SO}$ )  $\delta$  10.87 (s, 1H), 7.67 (d,  $J = 8.4$  Hz, 2H), 7.51–7.40 (m, 5H), 7.30–7.28 (m, 3H), 7.20 (t,  $J = 7.6$  Hz, 1H), 6.99 (t,  $J = 7.6$  Hz, 1H), 6.82 (d,  $J = 7.6$  Hz, 1H), 6.06 (s, 1H), 5.63 (s, 1H), 5.08 (d,  $J = 16.0$  Hz, 1H), 4.77 (d,  $J = 16.0$  Hz, 1H), 3.25 (d,  $J = 17.2$  Hz, 1H), 3.17 (d,

$J = 17.2$  Hz, 1H);  $^{13}\text{C}$  NMR (150 MHz,  $(\text{CD}_3)_2\text{SO}$ )  $\delta$  174.6, 165.1, 164.6, 142.9, 137.1, 135.8, 135.6, 130.2, 130.1, 129.6, 128.6, 128.4, 127.5, 127.3, 125.7, 122.6, 117.5, 109.3, 66.3, 43.0, 35.2; HRMS (ESI-TOF)  $m/z$  calcd for  $\text{C}_{26}\text{H}_{20}\text{ClN}_3\text{NaO}_3$   $[\text{M}+\text{Na}^+]$  480.1085, Found: 480.1091.

***N*-(1-Butyl-4'-methylene-2,5'-dioxospiro[indoline-3,2'-pyrrolidin]-1'-yl)-4-chlorobenzamide (4t).** White solid, 144 mg, yield 68%. 262–264 °C; IR (KBr)  $\nu$  3406, 2986, 1656, 1404, 1020  $\text{cm}^{-1}$ ;  $^1\text{H}$  NMR (600 MHz,  $(\text{CD}_3)_2\text{SO}$ )  $\delta$  10.76 (s, 1H), 7.66 (d,  $J = 8.4$  Hz, 2H), 7.47 (d,  $J = 8.4$  Hz, 2H), 7.43 (d,  $J = 7.2$  Hz, 1H), 7.30 (t,  $J = 7.2$  Hz, 1H), 7.05 (d,  $J = 7.8$  Hz, 1H), 7.02 (t,  $J = 7.8$  Hz, 1H), 6.03 (s, 1H), 5.59 (s, 1H), 3.75–3.70 (m, 1H) 3.67–3.62 (m, 1H), 3.16–3.09 (m, 2H), 1.62–1.57 (m, 2H), 1.32–1.26 (m, 2H), 0.87 (t,  $J = 7.2$  Hz, 3H);  $^{13}\text{C}$  NMR (150 MHz,  $(\text{CD}_3)_2\text{SO}$ )  $\delta$  174.3, 165.0, 164.5, 143.4, 137.0, 135.7, 130.3, 130.2, 129.5, 128.4, 125.7, 125.6, 122.3, 117.2, 108.9, 66.1, 39.3, 35.3, 28.9, 19.5, 13.7; HRMS (ESI-TOF)  $m/z$  calcd for  $\text{C}_{23}\text{H}_{22}\text{ClN}_3\text{NaO}_3$   $[\text{M}+\text{Na}^+]$  446.1242, Found: 446.1248.

***N*-(4'-Methylene-2,5'-dioxospiro[indoline-3,2'-pyrrolidin]-1'-yl)furan-2-carboxamide (4u).** White solid, 99 mg, yield 61%. m.p. 282–284 °C; IR (KBr)  $\nu$  3430, 2986, 2902, 1656, 1404, 1308, 1020  $\text{cm}^{-1}$ ;  $^1\text{H}$  NMR (400 MHz,  $(\text{CD}_3)_2\text{SO}$ )  $\delta$  10.63 (s, 1H), 10.62 (s, 1H), 7.82 (s, 1H), 7.38 (d,  $J = 7.2$  Hz, 1H), 7.24–7.21 (m, 2H), 6.96 (t,  $J = 7.2$  Hz, 1H), 6.82 (d,  $J = 7.6$  Hz, 1H), 6.57 (t,  $J = 1.6$  Hz, 1H), 6.00 (s, 1H), 5.56 (s, 1H), 3.15 (d,  $J = 17.2$  Hz, 1H), 3.04 (d,  $J = 17.2$  Hz, 1H);  $^{13}\text{C}$  NMR (150 MHz,  $(\text{CD}_3)_2\text{SO}$ )  $\delta$  176.1, 165.2, 156.8, 146.1, 145.1, 142.5, 135.8, 130.2, 126.3, 125.8, 121.9, 117.1, 115.4, 111.8, 109.8, 66.6, 35.6; HRMS (ESI-TOF)  $m/z$  calcd for  $\text{C}_{17}\text{H}_{13}\text{N}_3\text{NaO}_4$   $[\text{M}+\text{Na}^+]$  346.0798, Found: 346.0789.

***N*-(4'-Methylene-2,5'-dioxospiro[indoline-3,2'-pyrrolidin]-1'-yl)-2-naphthamide (4v).** White solid, 142 mg, yield 74%. m.p. 137–139 °C; IR (KBr)  $\nu$  3200, 1721, 1657, 1619, 1457, 1286, 1192, 572, 473  $\text{cm}^{-1}$ ;  $^1\text{H}$  NMR (600 MHz,  $(\text{CD}_3)_2\text{SO}$ )  $\delta$  10.85 (s, 1H), 10.68 (s, 1H), 8.34 (s, 1H), 7.97–7.92 (m, 3H), 7.74 (d,  $J = 9.0$  Hz, 1H), 7.61 (t,  $J = 7.8$  Hz, 1H), 7.57 (t,  $J = 7.2$  Hz, 1H), 7.44 (d,  $J = 7.8$  Hz, 1H), 7.21 (t,  $J = 7.8$  Hz, 1H), 6.96 (t,  $J = 7.8$  Hz, 1H), 6.82 (d,  $J = 7.8$  Hz, 1H), 6.03 (s, 1H), 5.59 (s, 1H), 3.19 (d,  $J = 16.8$  Hz, 1H), 3.10 (d,  $J = 17.4$  Hz, 1H);  $^{13}\text{C}$  NMR (100 MHz,  $(\text{CD}_3)_2\text{SO}$ )  $\delta$  176.2, 165.6, 165.1, 142.6, 136.0, 134.4, 131.8, 130.1, 128.9, 128.3, 128.0, 127.9, 127.60, 126.9, 126.2, 125.8, 124.1, 121.8, 116.9, 109.8, 66.7, 35.6; HRMS (ESI-TOF)  $m/z$  calcd for  $\text{C}_{23}\text{H}_{17}\text{N}_3\text{NaO}_3$   $[\text{M}+\text{Na}^+]$  406.1162, Found: 406.1165.

***N*-(4'-Methylene-2,5'-dioxospiro[indoline-3,2'-pyrrolidin]-1'-yl)dodecanamide (4w).** Colorless oil, 171 mg, yield 83%; IR (KBr)  $\nu$  3208, 2914, 1719, 1617, 1464, 1374, 1248  $\text{cm}^{-1}$ ;  $^1\text{H}$  NMR (600 MHz,  $\text{CDCl}_3$ )  $\delta$  9.35 (s, 1H), 8.95 (s, 1H), 7.51 (d,  $J = 7.2$  Hz, 1H), 7.27–7.24 (m, 1H), 7.06 (t,  $J = 7.2$  Hz, 1H), 6.90 (d,  $J = 7.8$  Hz, 1H), 6.16 (s, 1H), 5.49 (s, 1H), 3.10 (s, 2H), 2.09–2.04 (m, 1H), 2.03–1.98 (m, 1H), 1.36–1.32 (m, 2H), 1.31–1.26 (m, 2H), 1.23–1.17 (m, 8H), 1.14–1.05 (m, 4H), 1.03–0.96 (m, 1H), 0.94–0.91 (m, 1H), 0.87 (t,  $J = 7.8$  Hz, 3H);  $^{13}\text{C}$  NMR (150 MHz,  $\text{CDCl}_3$ )  $\delta$  177.9, 172.4, 167.2, 141.5, 134.6, 130.5, 126.2, 125.7, 123.4, 118.6, 110.6, 67.7, 35.2, 33.8, 31.9, 29.7, 29.6, 29.4, 29.3, 29.2, 28.6, 25.3, 22.6, 14.1; HRMS (ESI-TOF)  $m/z$  calcd for  $\text{C}_{24}\text{H}_{33}\text{N}_3\text{NaO}_3$   $[\text{M}+\text{Na}^+]$  434.2414, Found: 434.2405.

***N*-(4'-Methylene-2,5'-dioxospiro[indoline-3,2'-pyrrolidin]-1'-yl)stearamide (4x).** Colorless oil, 156 mg, yield 63%; IR (KBr)  $\nu$  3208, 2914, 2848, 1719, 1617, 1464, 1251,  $\text{cm}^{-1}$ ;  $^1\text{H}$  NMR (600 MHz,  $\text{CDCl}_3$ )  $\delta$  9.31 (s, 1H), 8.93 (s, 1H), 7.51 (d,  $J = 7.2$  Hz, 1H), 7.27–7.24 (m, 1H), 7.06 (t,  $J = 7.2$  Hz, 1H), 6.90 (d,  $J = 7.8$  Hz, 1H), 6.17 (s, 1H), 5.49 (s, 1H), 3.10 (s, 2H), 2.09–2.04 (m, 1H), 2.02–1.97 (m, 1H), 1.35–0.87 (m, 33H);  $^{13}\text{C}$  NMR (150 MHz,  $\text{CDCl}_3$ )  $\delta$  177.9, 172.4, 167.2, 141.5, 134.6, 130.5, 126.2, 125.8, 123.4, 118.7, 110.6, 67.7, 35.2, 33.9, 31.9, 29.7, 29.7, 29.6, 29.4, 29.4, 29.3, 28.6, 25.3, 22.7, 14.1; HRMS (ESI-TOF)  $m/z$  calcd for  $\text{C}_{30}\text{H}_{45}\text{N}_3\text{NaO}_3$   $[\text{M}+\text{Na}^+]$  518.3353, Found: 518.3340.

### 3. General experimental procedures for the synthesis of compounds 6a–6s

Isatins **1** (0.5 mmol, 1 equiv.), amines **5** (0.75 mmol, 1.5 equiv.),  $\text{CeCl}_3 \cdot 7\text{H}_2\text{O}$  (0.05 mmol, 0.1 equiv.) were put into a dried roundbottom flask (50 mL) fitted with a magnetic bar. THF (4 mL) was then added.

The mixture was stirred under reflux, and the reaction process was monitored by TLC. After reflux for 9 h, tin powder (1.75 mmol, 3.5 equiv.) and ethyl 2-(bromomethyl)acrylate **3** (1.5 mmol, 3 equiv.) in 2 mL of THF were added to the flask. The resulting mixture was stirred under reflux for another 3–19 h. The reaction mixture was cooled to room temperature. The saturated NH<sub>4</sub>Cl solution (6 mL) was poured into the mixture and stirred for 10 min. The mixture was extracted with EtOAc (3 × 10 mL). The combined organic phases were dried (MgSO<sub>4</sub>) and concentrated. Purification of the residue by silica gel column chromatography using hexane and EtOAc (3:1) as the eluent furnished the pure products **6**.

**Ethyl 2-((2-oxo-3-(phenylamino)indolin-3-yl)methyl)acrylate (6a).** Colorless oil, 139 mg, yield 83%. IR (KBr)  $\nu$  3274, 2152, 1701, 1599, 1467, 1311, 1182, 1014, 735 cm<sup>-1</sup>; <sup>1</sup>H NMR (600 MHz, CDCl<sub>3</sub>)  $\delta$  9.60 (s, 1H), 7.17 (t, *J* = 7.8 Hz, 1H), 7.13 (d, *J* = 7.2 Hz, 1H), 6.95–6.91 (m, 3H), 6.83 (d, *J* = 7.8 Hz, 1H), 6.59 (t, *J* = 7.8 Hz, 1H), 6.30–6.19 (m, 3H), 5.43 (s, 1H), 5.41 (s, 1H), 4.12 (q, *J* = 7.2 Hz, 2H), 3.24 (d, *J* = 13.2 Hz, 1H), 2.69 (d, *J* = 13.2 Hz, 1H), 1.23 (t, *J* = 7.2 Hz, 3H); <sup>13</sup>C NMR (150 MHz, CDCl<sub>3</sub>)  $\delta$  180.5, 167.5, 145.2, 139.7, 133.9, 130.4, 129.0, 128.9, 128.8, 124.9, 122.2, 118.4, 114.2, 110.8, 65.2, 61.2, 41.0, 14.0; HRMS (ESI–TOF) *m/z* calcd for C<sub>20</sub>H<sub>20</sub>N<sub>2</sub>NaO<sub>3</sub> [M+Na<sup>+</sup>] 359.1366, Found: 359.1361.

**Ethyl 2-((2-oxo-3-(phenylamino)indolin-3-yl)methyl)acrylate (6b).** Colorless oil, 130 mg, yield 74%; IR(KBr)  $\nu$  3298, 1707, 1605, 1467, 1317, 1185, 744 cm<sup>-1</sup>; <sup>1</sup>H NMR (600 MHz, CDCl<sub>3</sub>)  $\delta$  9.44 (s, 1H), 7.19 (t, *J* = 7.8 Hz, 1H), 7.05 (d, *J* = 7.2 Hz, 1H), 6.98 (d, *J* = 7.2 Hz, 1H), 6.92 (d, *J* = 7.2 Hz, 1H), 6.86 (d, *J* = 7.2 Hz, 1H), 6.66 (t, *J* = 7.2 Hz, 1H), 6.52 (t, *J* = 7.2 Hz, 1H), 6.33 (s, 1H), 5.69 (d, *J* = 8.4 Hz, 1H), 5.40 (s, 1H), 5.17 (s, 1H), 4.20–4.18 (m, 2H), 3.29 (d, *J* = 13.8 Hz, 1H), 2.61 (d, *J* = 13.8 Hz, 1H), 2.26 (s, 3H), 1.28 (t, *J* = 7.2 Hz, 3H); <sup>13</sup>C NMR (150 MHz, CDCl<sub>3</sub>)  $\delta$  180.7, 167.9, 143.3, 139.5, 139.4, 134.0, 130.6, 130.1, 129.1, 128.9, 126.69, 124.7, 123.3, 122.1, 117.9, 111.0, 64.9, 61.3, 41.3, 18.0, 14.1; HRMS (ESI–TOF) *m/z* calcd for C<sub>21</sub>H<sub>23</sub>N<sub>2</sub>O<sub>3</sub> [M+H<sup>+</sup>] 351.1703, Found: 351.1698.

**Ethyl 2-((2-oxo-3-(*m*-tolylamino)indolin-3-yl)methyl)acrylate (6c).** White solid, 142 mg, yield 81%. m.p. 136–138 °C; IR (KBr)  $\nu$  3298, 1707, 1605, 1467, 1317, 1185, 744 cm<sup>-1</sup>; <sup>1</sup>H NMR (600 MHz, CDCl<sub>3</sub>)  $\delta$  9.32 (s, 1H), 7.20 (t, *J* = 7.8 Hz, 1H), 7.13 (d, *J* = 7.8 Hz, 1H), 6.95 (t, *J* = 7.8 Hz, 1H), 6.86 (d, *J* = 7.8 Hz, 1H), 6.78 (t, *J* = 7.8 Hz, 1H), 6.43 (d, *J* = 7.2 Hz, 1H), 6.26 (s, 1H), 6.19 (s, 1H), 5.91 (d, *J* = 8.4 Hz, 1H), 5.43 (s, 1H), 5.27 (d, *J* = 4.8 Hz, 1H), 4.13 (q, *J* = 7.2 Hz, 2H), 3.24 (d, *J* = 13.2 Hz, 1H), 2.66 (d, *J* = 13.8 Hz, 1H), 2.08 (s, 3H), 1.25 (t, *J* = 7.2 Hz, 3H); <sup>13</sup>C NMR (150 MHz, CDCl<sub>3</sub>)  $\delta$  180.4, 167.7, 145.1, 139.7, 138.6, 134.0, 130.4, 129.1, 129.0, 128.8, 125.0, 122.3, 119.5, 115.7, 110.8, 110.7, 65.1, 61.2, 41.1, 21.4, 14.1; HRMS (ESI–TOF) *m/z* calcd for C<sub>21</sub>H<sub>23</sub>N<sub>2</sub>O<sub>3</sub> [M+H<sup>+</sup>] 351.1703, Found: 351.1697.

**Ethyl 2-((2-oxo-3-(*p*-tolylamino)indolin-3-yl)methyl)acrylate (6d).** Colorless oil, 145 mg, yield 83%. IR (KBr)  $\nu$  3280, 2974, 1701, 1614, 1509, 1467, 1305, 1182, 1014, 735 cm<sup>-1</sup>; <sup>1</sup>H NMR (600 MHz, CDCl<sub>3</sub>)  $\delta$  9.38 (br, 1H), 7.19–7.14 (m, 2H), 6.95 (t, *J* = 7.8 Hz, 1H), 6.80 (d, *J* = 7.8 Hz, 1H), 6.72 (d, *J* = 7.8 Hz, 2H), 6.24 (s, 1H), 6.17–6.15 (m, 2H), 5.44 (s, 1H), 5.14 (s, 1H), 4.11 (q, *J* = 7.2 Hz, 2H), 3.24 (d, *J* = 7.2 Hz, 1H), 2.68 (dd, *J* = 13.2, 3.6 Hz, 1H), 2.08 (s, 3H), 1.24 (t, *J* = 7.2 Hz, 3H); <sup>13</sup>C NMR (150 MHz, CDCl<sub>3</sub>)  $\delta$  180.6, 167.5, 142.8, 139.8, 134.1, 130.1, 129.4, 129.1, 128.9, 127.8, 125.0, 122.2, 114.7, 110.8, 65.4, 61.1, 41.0, 20.3, 14.0; HRMS (ESI–TOF) *m/z* calcd for C<sub>21</sub>H<sub>23</sub>N<sub>2</sub>O<sub>3</sub> [M+H<sup>+</sup>] 351.1703, Found: 359.1698.

**Ethyl 2-((3-((4-methoxyphenyl)amino)-2-oxoindolin-3-yl)methyl)acrylate (6e).** White solid, 119 mg, yield 65%. m.p. 126–128 °C; IR (KBr)  $\nu$  3274, 2176, 1707, 1617, 1506, 1464, 1299, 1179, 1020, 744 cm<sup>-1</sup>; <sup>1</sup>H NMR (600 MHz, CDCl<sub>3</sub>)  $\delta$  8.96 (s, 1H), 7.22–7.19 (m, 2H), 6.98 (t, *J* = 7.8 Hz, 1H), 6.80 (d, *J* = 7.8 Hz, 1H), 6.49 (d, *J* = 9.0 Hz, 2H), 6.26 (d, *J* = 9.0 Hz, 2H), 6.23 (s, 1H), 5.46 (s, 1H), 4.82 (s, 1H), 4.09 (q, *J* = 7.2 Hz, 2H), 3.57 (s, 3H), 3.25 (d, *J* = 13.2 Hz, 1H), 2.68 (d, *J* = 13.2 Hz, 1H), 1.23 (t, *J* = 7.2 Hz, 3H); <sup>13</sup>C NMR (150 MHz, CDCl<sub>3</sub>)  $\delta$  180.5, 167.4, 167.4, 153.2, 140.0, 138.9, 134.3, 129.9, 129.2, 129.0, 125.3, 122.3, 117.5, 117.4, 114.3, 110.7, 66.2, 61.1, 55.4, 40.8, 14.1; HRMS (ESI–TOF) *m/z* calcd for C<sub>21</sub>H<sub>22</sub>N<sub>2</sub>NaO<sub>4</sub> [M+Na<sup>+</sup>] 389.1472, Found: 389.1478.

**Ethyl 2-((3-((2,6-dimethylphenyl)amino)-2-oxoindolin-3-yl)methyl)acrylate (6f).** White solid, 138 mg, yield 76%. m.p. 149–151 °C; IR (KBr)  $\nu$  3313, 2983, 2255, 1724, 1513, 1238, 1186, 1040, 903, 733  $\text{cm}^{-1}$ ;  $^1\text{H}$  NMR (600 MHz,  $\text{CDCl}_3$ )  $\delta$  9.40 (br, 1H), 7.08 (t,  $J = 7.8$  Hz, 1H), 6.84 (d,  $J = 7.8$  Hz, 2H), 6.78 (dd,  $J = 13.8, 7.2$  Hz, 2H), 6.73 (t,  $J = 7.8$  Hz, 1H), 6.62 (d,  $J = 7.8$  Hz, 1H), 6.06 (s, 1H), 5.53 (s, 1H), 3.95–3.87 (m, 2H), 3.84 (d,  $J = 2.4$  Hz, 1H), 3.44 (d,  $J = 12.6$  Hz, 1H), 3.04 (d,  $J = 12.6$  Hz, 1H), 2.11 (s, 6H), 1.11 (t,  $J = 7.2$  Hz, 3H);  $^{13}\text{C}$  NMR (150 MHz,  $\text{CDCl}_3$ )  $\delta$  180.8, 166.9, 142.2, 140.5, 134.5, 133.1, 128.8, 128.7, 128.2, 127.9, 126.3, 123.4, 121.5, 110.0, 67.9, 60.7, 42.1, 19.2, 13.9. HRMS (ESI–TOF)  $m/z$  calcd for  $\text{C}_{22}\text{H}_{24}\text{N}_2\text{NaO}_3$  [ $\text{M}+\text{Na}^+$ ] 387.1679, Found: 387.1674.

**Ethyl 2-((3-((4-fluorophenyl)amino)-2-oxoindolin-3-yl)methyl)acrylate (6h).** White solid, 175 mg, yield 99%. m.p. 112–114 °C; IR (KBr)  $\nu$  3274, 2974, 1701, 1614, 1503, 1467, 1311, 1182, 1014, 744  $\text{cm}^{-1}$ ;  $^1\text{H}$  NMR (600 MHz,  $\text{CDCl}_3$ )  $\delta$  9.40 (s, 1H), 7.24–7.19 (m, 1H), 7.16 (d,  $J = 7.2$  Hz, 1H), 6.98 (t,  $J = 7.2$  Hz, 1H), 6.84 (d,  $J = 7.8$  Hz, 1H), 6.63 (t,  $J = 8.4$  Hz, 2H), 6.26 (s, 1H), 6.21–6.19 (m, 2H), 5.43 (s, 1H), 5.26 (s, 1H), 4.13 (q,  $J = 7.2$  Hz, 2H), 3.23 (d,  $J = 13.2$  Hz, 1H), 2.67 (dd,  $J = 13.2, 7.8$  Hz, 1H), 1.25–1.23 (m, 3H);  $^{13}\text{C}$  NMR (150 MHz,  $\text{CDCl}_3$ )  $\delta$  180.3, 167.6, 156.5 (d,  $J_{\text{C-F}} = 234.0$  Hz), 141.4, 139.7, 134.0, 130.3, 129.2, 128.8, 125.1, 122.5, 116.0 (d,  $J_{\text{C-F}} = 7.5$  Hz), 115.4 (d,  $J_{\text{C-F}} = 22.5$  Hz), 110.8, 65.7, 61.3, 41.0, 14.1; HRMS (ESI–TOF)  $m/z$  calcd for  $\text{C}_{20}\text{H}_{19}\text{FN}_2\text{NaO}_3$  [ $\text{M}+\text{Na}^+$ ] 377.1272, Found: 377.1266.

**Ethyl 2-((2-oxo-3-((4-(trifluoromethyl)phenyl)amino)indolin-3-yl)methyl)acrylate (6i).** Colorless oil, 181 mg, yield 90%. IR (KBr)  $\nu$  3423, 3002, 2916, 1709, 1653, 1420, 1323, 1009, 964, 701  $\text{cm}^{-1}$ ;  $^1\text{H}$  NMR (600 MHz,  $\text{CDCl}_3$ )  $\delta$  9.29 (s, 1H), 7.23 (d,  $J = 7.8$  Hz, 1H), 7.17 (d,  $J = 8.4$  Hz, 2H), 7.08 (d,  $J = 7.2$  Hz, 1H), 6.98 (t,  $J = 7.2$  Hz, 1H), 6.91 (d,  $J = 7.8$  Hz, 1H), 6.33 (s, 1H), 6.21 (d,  $J = 8.4$  Hz, 2H), 6.09 (d,  $J = 10.2$  Hz, 1H), 5.40 (s, 1H), 4.20 (q,  $J = 7.2$  Hz, 2H), 3.22 (d,  $J = 13.2$  Hz, 1H), 2.65 (d,  $J = 13.2$  Hz, 1H), 1.29 (t,  $J = 7.2$  Hz, 3H);  $^{13}\text{C}$  NMR (100 MHz,  $\text{CDCl}_3$ )  $\delta$  179.7, 168.1, 147.9, 139.4, 133.6, 131.3, 129.4, 128.2, 124.9, 124.7 (q,  $J_{\text{C-F}} = 268.0$  Hz), 123.3, 122.6, 119.7 (q,  $J_{\text{C-F}} = 32.0$  Hz), 113.1, 111.0, 64.8, 61.6, 41.2, 14.1; HRMS (ESI–TOF)  $m/z$  calcd for  $\text{C}_{21}\text{H}_{20}\text{F}_3\text{N}_2\text{O}_3$  [ $\text{M}+\text{H}^+$ ] 405.1421, Found: 405.1416.

**Ethyl 2-((3-((4-chlorophenyl)amino)-2-oxoindolin-3-yl)methyl)acrylate (6j).** White solid, 172 mg, yield 93%. m.p. 147–149 °C; IR (KBr)  $\nu$  3340, 2164, 1707, 1599, 1488, 1311, 1182,  $\text{cm}^{-1}$ ;  $^1\text{H}$  NMR (600 MHz,  $\text{CDCl}_3$ )  $\delta$  9.55 (s, 1H), 7.21 (t,  $J = 7.2$  Hz, 1H), 7.11 (d,  $J = 7.2$  Hz, 1H), 6.97 (t,  $J = 7.2$  Hz, 1H), 6.87–6.83 (m, 3H), 6.28 (s, 1H), 6.14 (d,  $J = 9.0$  Hz, 2H), 5.60 (s, 1H), 5.42 (s, 1H), 4.15 (q,  $J = 7.2$  Hz, 2H), 3.22 (d,  $J = 13.2$  Hz, 1H), 2.66 (d,  $J = 13.2$  Hz, 1H), 1.26 (t,  $J = 7.2$  Hz, 3H);  $^{13}\text{C}$  NMR (150 MHz,  $\text{CDCl}_3$ )  $\delta$  180.2, 167.8, 143.8, 139.6, 133.8, 130.7, 129.2, 128.8, 128.5, 124.9, 123.1, 122.5, 115.3, 110.9, 65.2, 61.4, 41.1, 14.1; HRMS (ESI–TOF)  $m/z$  calcd for  $\text{C}_{20}\text{H}_{19}\text{ClN}_2\text{NaO}_3$  [ $\text{M}+\text{Na}^+$ ] 393.0976, Found: 393.0968.

**Ethyl 2-((3-((4-bromophenyl)amino)-2-oxoindolin-3-yl)methyl)acrylate (6k).** White solid, 126 mg, yield 61%. m.p. 143–145 °C; IR (KBr)  $\nu$  3334, 1707, 1590, 1467, 1311, 1182, 735  $\text{cm}^{-1}$ ;  $^1\text{H}$  NMR (600 MHz,  $\text{CDCl}_3$ )  $\delta$  9.32 (s, 1H), 7.23 (t,  $J = 7.8$  Hz, 1H), 7.10 (d,  $J = 7.8$  Hz, 1H), 7.01 (s, 1H), 6.99 (d,  $J = 3.0$  Hz, 1H), 6.97 (d,  $J = 7.2$  Hz, 1H), 6.85 (d,  $J = 7.8$  Hz, 1H), 6.29 (s, 1H), 6.09 (d,  $J = 8.4$  Hz, 2H), 5.59 (d,  $J = 2.4$  Hz, 1H), 5.41 (s, 1H), 4.16 (q,  $J = 7.2$  Hz, 2H), 3.21 (d,  $J = 13.2$  Hz, 1H), 2.65 (d,  $J = 13.8$  Hz, 1H), 1.27 (t,  $J = 7.2$  Hz, 3H);  $^{13}\text{C}$  NMR (150 MHz,  $\text{CDCl}_3$ )  $\delta$  180.1, 167.8, 144.3, 139.5, 133.8, 131.7, 130.8, 129.3, 128.5, 124.9, 122.5, 115.7, 110.9, 110.3, 65.1, 61.4, 41.1, 14.1; HRMS (ESI–TOF)  $m/z$  calcd for  $\text{C}_{20}\text{H}_{19}\text{BrN}_2\text{NaO}_3$  [ $\text{M}+\text{Na}^+$ ] 437.0471, Found: 437.0464.

**Ethyl 2-((3-((4-fluorophenyl)amino)-5-methyl-2-oxoindolin-3-yl)methyl)acrylate (6m).** White solid, 166 mg, yield 90%. m.p. 176–178 °C; IR (KBr)  $\nu$  3380, 1716, 1626, 1510, 1305, 1226, 1172, 1026, 821  $\text{cm}^{-1}$ ;  $^1\text{H}$  NMR (600 MHz,  $\text{CDCl}_3$ )  $\delta$  9.14 (s, 1H), 7.01 (d,  $J = 7.8$  Hz, 1H), 6.98 (s, 1H), 6.73 (d,  $J = 7.8$  Hz, 1H), 6.64 (t,  $J = 8.4$  Hz, 2H), 6.25 (s, 1H), 6.20 (dd,  $J = 8.4, 4.2$  Hz, 2H), 5.45 (s, 1H), 5.21 (s, 1H), 4.15–4.09 (m, 2H), 3.19 (d,  $J = 13.2$  Hz, 1H), 2.68 (d,  $J = 13.8$  Hz, 1H), 2.26 (s, 3H), 1.25 (t,  $J = 7.2$  Hz, 3H);  $^{13}\text{C}$  NMR (150 MHz,  $\text{CDCl}_3$ )  $\delta$  179.1, 166.6, 155.9 (d,  $J_{\text{C-F}} = 235.5$  Hz), 140.6, 136.3, 133.1, 131.0,



129.1, 128.6, 128.0, 124.6, 114.8 (d,  $J_{C-F}$  = 7.5 Hz), 114.4 (d,  $J_{C-F}$  = 22.5 Hz), 109.5, 64.7, 60.2, 40.1, 20.1, 13.1 ; HRMS (ESI-TOF)  $m/z$  calcd for  $C_{21}H_{21}FN_2NaO_3$  [ $M+Na^+$ ] 391.1428, Found: 391.1432.

**Ethyl 2-((5-chloro-3-((4-fluorophenyl)amino)-2-oxoindolin-3-yl)methyl)acrylate (6n).** White solid, 169 mg, yield 87%. m.p. 159–161 °C; IR (KBr)  $\nu$  3368, 2924, 1714, 1621, 1513, 1184, 818  $cm^{-1}$ ;  $^1H$  NMR (600 MHz,  $CDCl_3$ )  $\delta$  9.14 (s, 1H), 7.21 (d,  $J$  = 6.0 Hz, 1H), 7.15 (s, 1H), 6.79 (d,  $J$  = 8.4 Hz, 1H), 6.67 (t,  $J$  = 9.0 Hz, 2H), 6.30 (s, 1H), 6.19 (dd,  $J$  = 9.0, 4.2 Hz, 2H), 5.46 (s, 1H), 5.22 (s, 1H), 4.21–4.12 (m, 2H), 3.21 (d,  $J$  = 13.2 Hz, 1H), 2.65 (d,  $J$  = 13.2 Hz, 1H), 1.29 (t,  $J$  = 7.2 Hz, 3H);  $^{13}C$  NMR (150 MHz,  $CDCl_3$ )  $\delta$  179.7, 167.5, 156.6 (d,  $J_{C-F}$  = 237.0 Hz), 141.1, 141.0, 138.2, 133.8, 130.7, 129.3, 128.1, 125.4, 116.0 (d,  $J_{C-F}$  = 7.5 Hz), 115.6 (d,  $J_{C-F}$  = 22.5 Hz), 111.8, 65.8, 61.5, 41.0, 14.1; HRMS (ESI-TOF)  $m/z$  calcd for  $C_{20}H_{18}ClFN_2NaO_3$  [ $M+Na^+$ ] 411.0882, Found: 411.0886.

**Ethyl 2-((5-bromo-3-((4-fluorophenyl)amino)-2-oxoindolin-3-yl)methyl)acrylate (6o).** White solid, 171 mg, yield 79%. m.p. 172–174 °C; IR (KBr)  $\nu$  3368, 1718, 1621, 1508, 1466, 1192, 813  $cm^{-1}$ ;  $^1H$  NMR (600 MHz,  $CDCl_3$ )  $\delta$  8.96 (s, 1H), 7.37 (dd,  $J$  = 7.8, 1.8 Hz, 1H), 7.29 (d,  $J$  = 1.8 Hz, 1H), 6.75 (d,  $J$  = 7.8 Hz, 1H), 6.67 (t,  $J$  = 8.4 Hz, 2H), 6.30 (s, 1H), 6.19 (dd,  $J$  = 9.0, 4.0 Hz, 2H), 5.47 (s, 1H), 5.18 (s, 1H), 4.21–4.12 (m, 2H), 3.20 (d,  $J$  = 13.2 Hz, 1H), 2.66 (d,  $J$  = 13.2 Hz, 1H), 1.29 (t,  $J$  = 7.2 Hz, 3H);  $^{13}C$  NMR (150 MHz,  $CDCl_3$ )  $\delta$  179.4, 167.5, 156.7 (q,  $J_{C-F}$  = 235.5 Hz), 141.0, 138.6, 133.8, 132.2, 131.0, 130.6, 128.2, 116.0 (d,  $J_{C-F}$  = 7.5 Hz), 115.6 (d,  $J_{C-F}$  = 22.5 Hz), 115.4, 112.2, 65.7, 61.5, 41.0, 14.1; HRMS (ESI-TOF)  $m/z$  calcd for  $C_{20}H_{18}BrFN_2NaO_3$  [ $M+Na^+$ ] 455.0377, Found: 455.0381.

**Ethyl 2-((3-(naphthalen-2-ylamino)-2-oxoindolin-3-yl)methyl)acrylate (6p).** White solid, 143 mg, yield 74%. m.p. 166–168 °C; IR (KBr)  $\nu$  3304, 1717, 1627, 1536, 1470, 1317, 1189, 745  $cm^{-1}$ ;  $^1H$  NMR (600 MHz,  $CDCl_3$ )  $\delta$  9.43 (s, 1H), 7.53 (d,  $J$  = 7.8 Hz, 1H), 7.43 (d,  $J$  = 8.4 Hz, 1H), 7.23–7.21 (m, 1H), 7.23–7.21 (m, 2H), 7.13–7.08 (m, 2H), 6.92 (t,  $J$  = 7.8 Hz, 1H), 6.88 (d,  $J$  = 7.8 Hz, 1H), 6.75 (d,  $J$  = 9.0 Hz, 1H), 6.27 (s, 1H), 6.20 (s, 1H), 5.69 (s, 1H), 5.42 (s, 1H), 4.17–4.12 (m, 2H), 3.28 (d,  $J$  = 13.2 Hz, 1H), 2.69 (d,  $J$  = 13.2 Hz, 1H), 1.24 (t,  $J$  = 7.2 Hz, 3H);  $^{13}C$  NMR (150 MHz,  $CDCl_3$ )  $\delta$  180.3, 167.8, 142.8, 139.7, 134.5, 133.9, 130.6, 129.1, 128.7, 128.6, 127.8, 127.3, 126.2, 125.9, 125.0, 122.4, 122.3, 118.5, 110.8, 106.9, 65.3, 61.3, 41.1, 14.0; HRMS (ESI-TOF)  $m/z$  calcd for  $C_{24}H_{22}N_2NaO_3$  [ $M+Na^+$ ] 409.1523, Found: 409.1526.

**Ethyl 2-((1-benzyl-3-((4-fluorophenyl)amino)-2-oxoindolin-3-yl)methyl)acrylate (6q).** Colorless oil, 198 mg, yield 89%. IR (KBr)  $\nu$  3384, 1707, 1613, 1509, 1362, 1182, 752  $cm^{-1}$ ;  $^1H$  NMR (600 MHz,  $CDCl_3$ )  $\delta$  7.27–7.24 (m, 4H), 7.19 (t,  $J$  = 7.8 Hz, 1H), 7.14 (d,  $J$  = 7.2 Hz, 2H), 6.99 (t,  $J$  = 7.2 Hz, 1H), 6.74 (d,  $J$  = 7.8 Hz, 1H), 6.60 (t,  $J$  = 8.4 Hz, 2H), 6.22 (s, 1H), 6.18 (dd,  $J$  = 9.0, 4.2 Hz, 2H), 5.43 (s, 1H), 5.06 (d,  $J$  = 15.6 Hz, 1H), 4.94 (s, 1H), 4.68 (d,  $J$  = 15.6 Hz, 1H), 4.11 (q,  $J$  = 7.2 Hz, 2H), 3.31 (d,  $J$  = 13.2 Hz, 1H), 2.67 (d,  $J$  = 13.2 Hz, 1H), 1.24 (t,  $J$  = 7.2 Hz, 3H);  $^{13}C$  NMR (150 MHz,  $CDCl_3$ )  $\delta$  177.2, 167.4, 157.1 (d,  $J_{C-F}$  = 235.5 Hz), 141.9, 141.3, 135.5, 134.4, 129.9, 129.1, 128.6, 128.2, 127.6, 127.5, 125.1, 122.4, 117.9 (d,  $J_{C-F}$  = 7.5 Hz), 115.3 (d,  $J_{C-F}$  = 22.5 Hz), 109.6, 65.6, 61.1, 43.9, 40.8, 14.1; HRMS (ESI-TOF)  $m/z$  calcd for  $C_{27}H_{25}FN_2NaO_3$  [ $M+Na^+$ ] 467.1741, Found: 467.1747.

**Ethyl 2-((1-ethyl-3-((4-fluorophenyl)amino)-2-oxoindolin-3-yl)methyl)acrylate (6r).** White solid, 159 mg, yield 83%. m.p. 128–129 °C; IR (KBr)  $\nu$  3377, 2924, 1714, 1607, 1505, 1371, 752  $cm^{-1}$ ;  $^1H$  NMR (600 MHz,  $CDCl_3$ )  $\delta$  7.31 (t,  $J$  = 7.8 Hz, 1H), 7.24 (d,  $J$  = 7.2 Hz, 1H), 7.02 (t,  $J$  = 7.8 Hz, 1H), 6.88 (d,  $J$  = 7.8 Hz, 1H), 6.64 (t,  $J$  = 9.0 Hz, 2H), 6.21 (s, 1H), 6.15 (dd,  $J$  = 9.0, 4.8 Hz, 2H), 5.42 (s, 1H), 4.89 (s, 1H), 4.14–4.07 (m, 2H), 3.77–3.73 (m, 2H), 3.25 (d,  $J$  = 13.2 Hz, 1H), 2.61 (d,  $J$  = 13.2 Hz, 1H), 1.24 (t,  $J$  = 7.2 Hz, 3H), 1.20 (t,  $J$  = 7.2 Hz, 3H);  $^{13}C$  NMR (150 MHz,  $CDCl_3$ )  $\delta$  176.8, 167.4, 156.75 (d,  $J_{C-F}$  = 237.0 Hz), 141.8, 141.4, 134.3, 129.9, 129.2, 128.4, 125.3, 122.2, 116.8 (d,  $J_{C-F}$  = 7.5 Hz), 115.3 (d,  $J_{C-F}$  = 22.5 Hz), 108.6, 65.2, 61.1, 40.8, 34.7, 14.1, 12.5.; HRMS (ESI-TOF)  $m/z$  calcd for  $C_{22}H_{23}FN_2O_3Na$  [ $M+Na^+$ ] 405.1585, Found: 405.1587.

**Ethyl 2-((1-butyl-3-((4-fluorophenyl)amino)-2-oxoindolin-3-yl)methyl)acrylate (6s).** White solid, 164 mg, yield 80%. m.p. 104–105 °C; IR (KBr)  $\nu$  3358, 2956, 1705, 1615, 1510, 1331, 1186, 826, 752, 518  $\text{cm}^{-1}$ ;  $^1\text{H}$  NMR (600 MHz,  $\text{CDCl}_3$ )  $\delta$  7.30 (t,  $J = 7.8$  Hz, 1H), 7.24 (d,  $J = 7.8$  Hz, 1H), 7.01 (t,  $J = 7.8$  Hz, 1H), 6.87 (d,  $J = 7.8$  Hz, 1H), 6.63 (t,  $J = 9.0$  Hz, 2H), 6.21 (s, 1H), 6.16 (dd,  $J = 9.0, 4.8$  Hz, 2H), 5.41 (s, 1H), 4.91 (s, 1H), 4.11 (q,  $J = 7.2$  Hz, 2H), 3.73–3.63 (m, 2H), 3.25 (d,  $J = 13.2$  Hz, 1H), 2.60 (d,  $J = 13.2$  Hz, 1H), 1.63–1.53 (m, 2H), 1.33–1.28 (m, 2H), 1.24 (t,  $J = 7.2$  Hz, 3H), 0.92 (t,  $J = 7.2$  Hz, 3H);  $^{13}\text{C}$  NMR (150 MHz,  $\text{CDCl}_3$ )  $\delta$  176.9, 167.4, 156.8 (d,  $J_{\text{C-F}} = 237.0$  Hz), 142.3, 141.4, 134.3, 129.8, 129.1, 128.3, 125.2, 122.1, 117.1 (d,  $J_{\text{C-F}} = 7.5$  Hz), 115.2 (d,  $J_{\text{C-F}} = 22.5$  Hz), 108.7, 65.3, 61.1, 40.7, 39.8, 29.4, 20.1, 14.1, 13.7; HRMS (ESI–TOF)  $m/z$  calcd for  $\text{C}_{24}\text{H}_{27}\text{FN}_2\text{NaO}_3$  [ $\text{M}+\text{Na}^+$ ] 433.1898, Found: 433.1900.

# IR, NMR and HRMS Spectra of Compounds 4 and 6

## N-(4'-methylene-2,5'-dioxospiro[indoline-3,2'-pyrrolidin]-1'-yl)benzamide (4a)

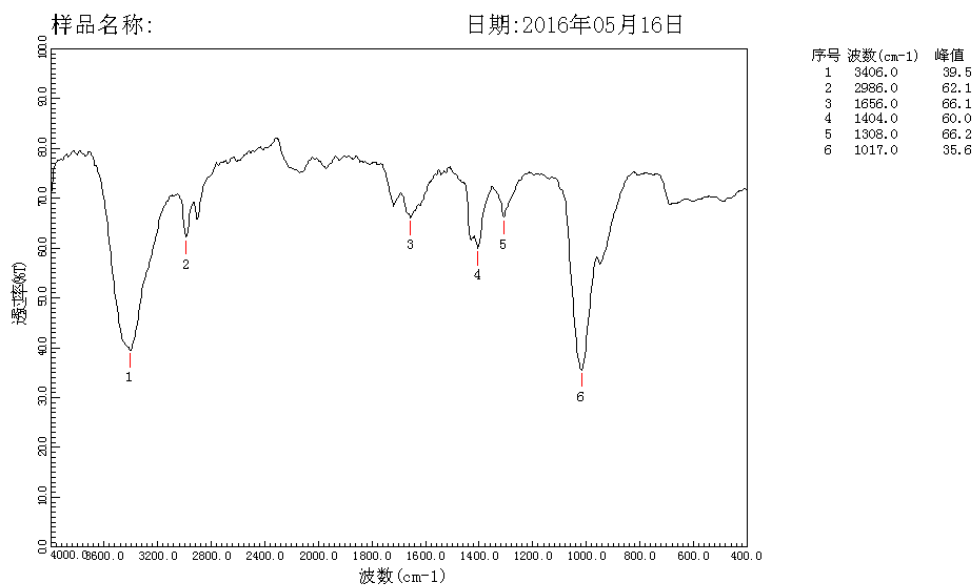

测试条件: 间隔: 3.0cm-1 狭缝: 正常 响应: 正常 温度: \_\_\_\_\_ 湿度: \_\_\_\_\_  
 仪器名称: WGH-30/6型双光束红外分光光度计 生产厂家: 天津市港东科技发展有限公司  
 测试单位: \_\_\_\_\_ 测试人: \_\_\_\_\_

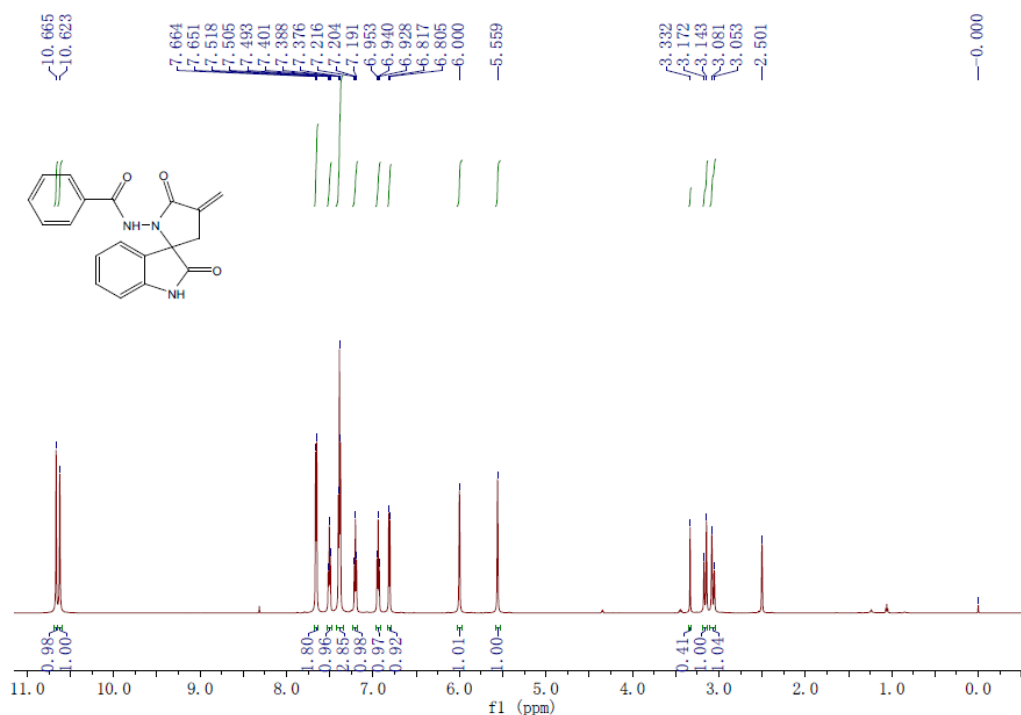

176.19  
 165.56  
 165.09  
 142.60  
 135.99  
 132.03  
 131.65  
 130.12  
 128.28  
 127.64  
 126.21  
 125.78  
 121.89  
 66.60  
 39.93  
 39.80  
 39.66  
 39.52  
 39.36  
 39.24  
 39.10  
 35.54

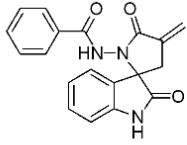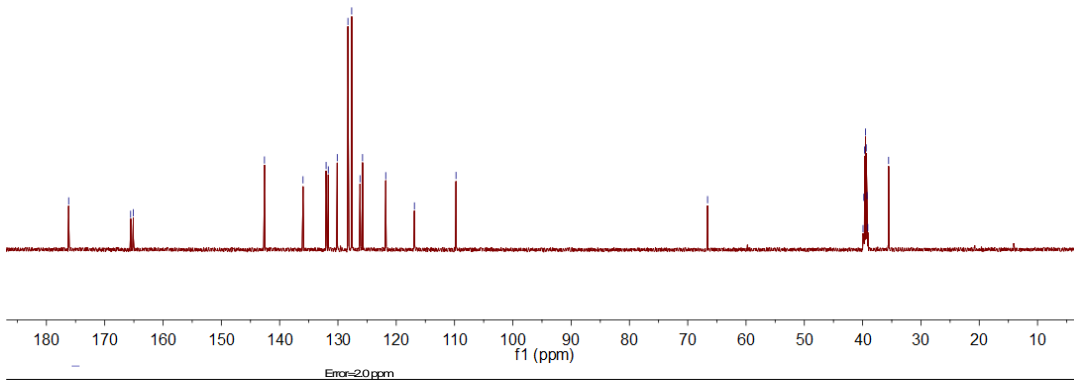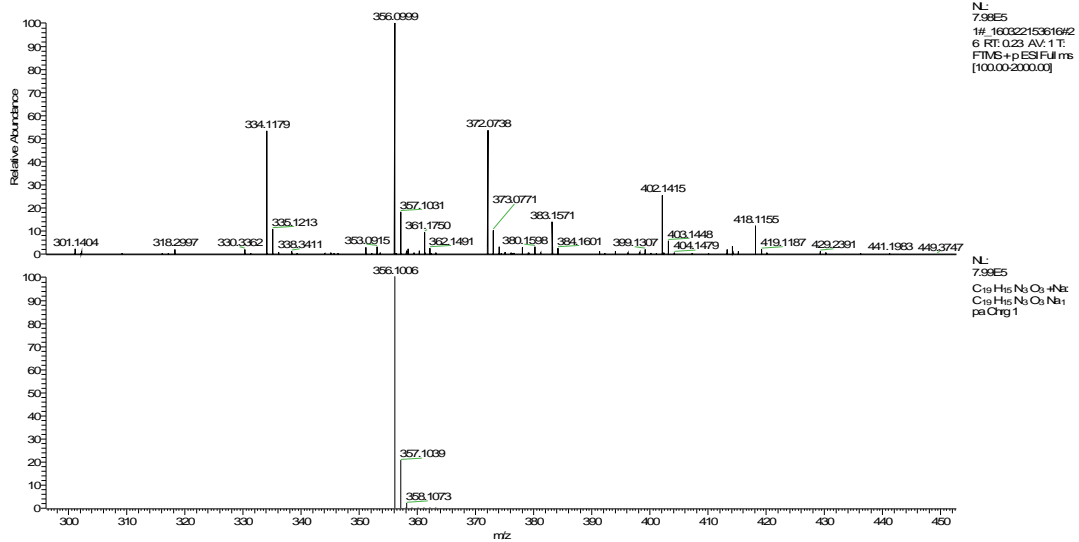

**2-Methyl-N-(4'-methylene-2,5'-dioxospiro[indoline-3,2'-pyrrolidin]-1'-yl)benzamide (4b)**

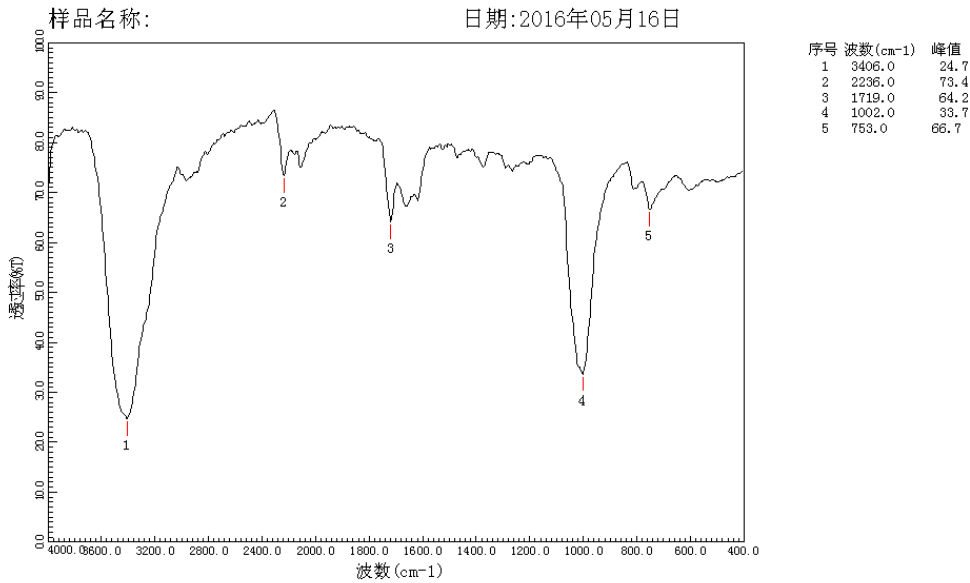

测试条件: 间隔: 3.0cm-1 狭缝: 正常 响应: 正常 温度: \_\_\_\_\_ 湿度: \_\_\_\_\_  
 仪器名称: WGH-30/6型双光束红外分光光度计 生产厂家: 天津市港东科技发展有限公司  
 测试单位: \_\_\_\_\_ 测试人: \_\_\_\_\_

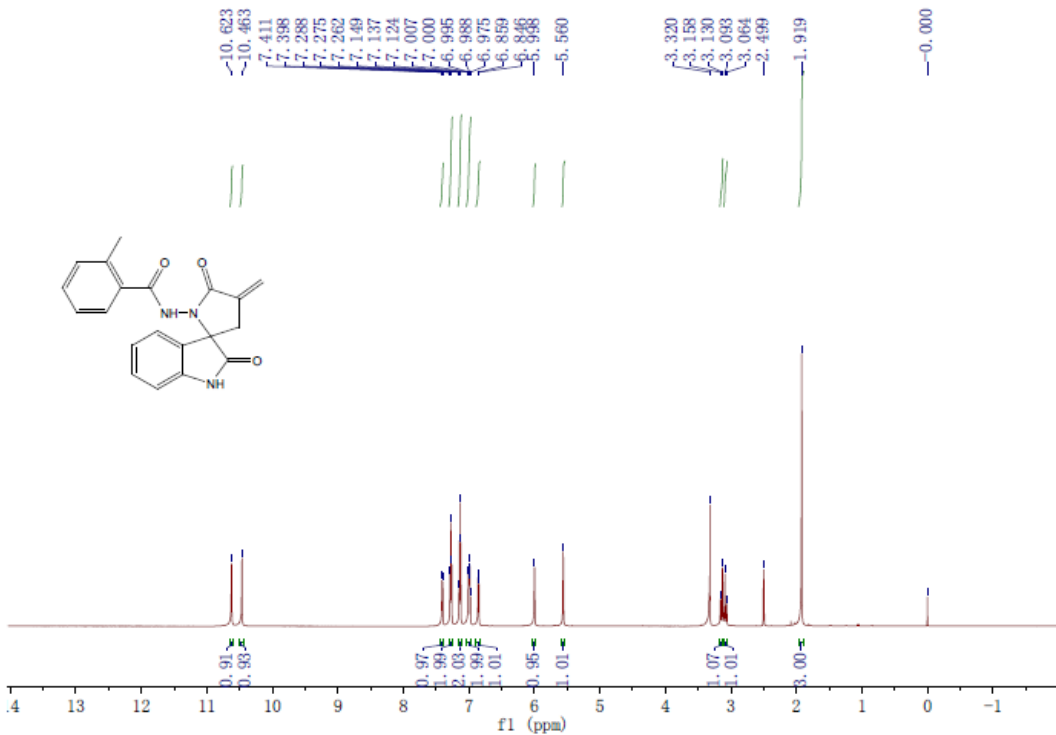

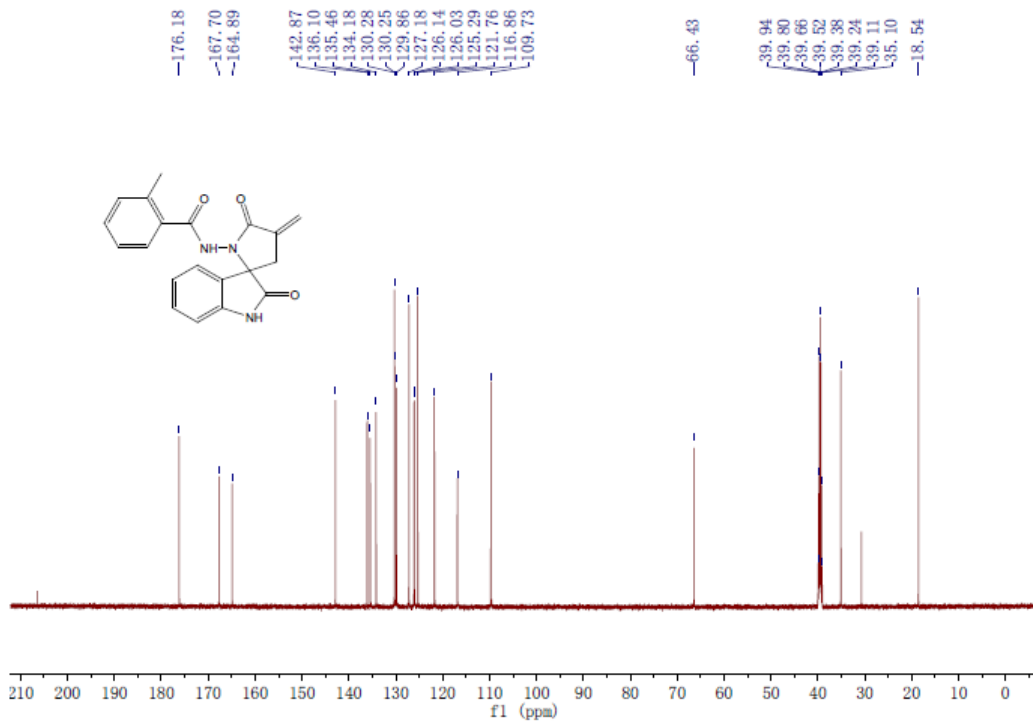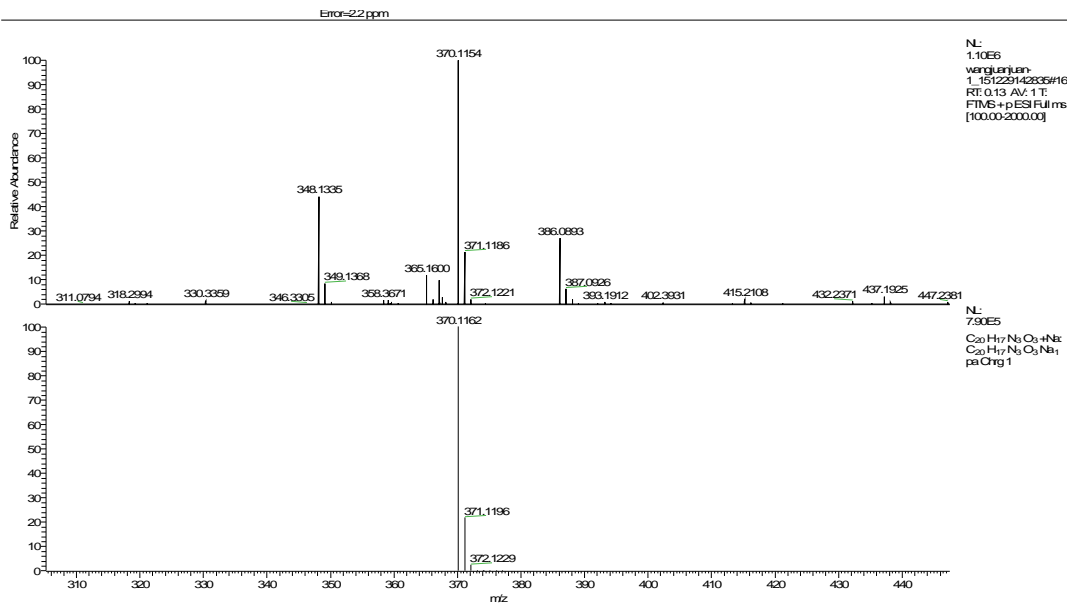

**3-Methyl-N-(4'-methylene-2,5'-dioxospiro[indoline-3,2'-pyrrolidin]-1'-yl)benzamide(4c)**

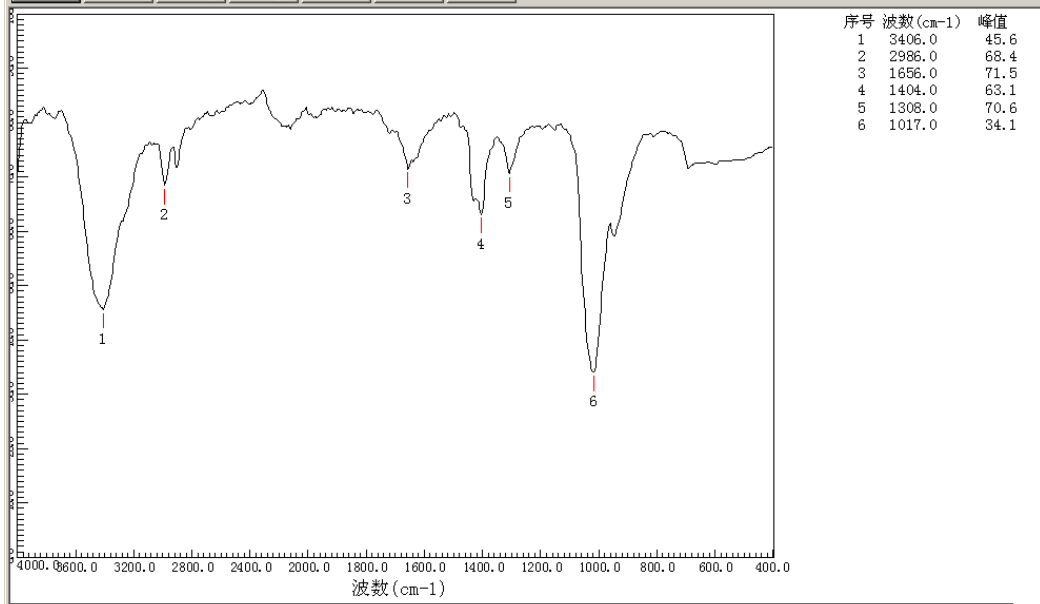

测试条件: 间隔: 3.0cm-1 狭缝: 正常 响应: 正常 温度: 湿度:  
 仪器名称: WGH-30/6型双光束红外分光光度计 生产厂家: 天津市港东科技发展有限公司  
 测试单位: 测试人:

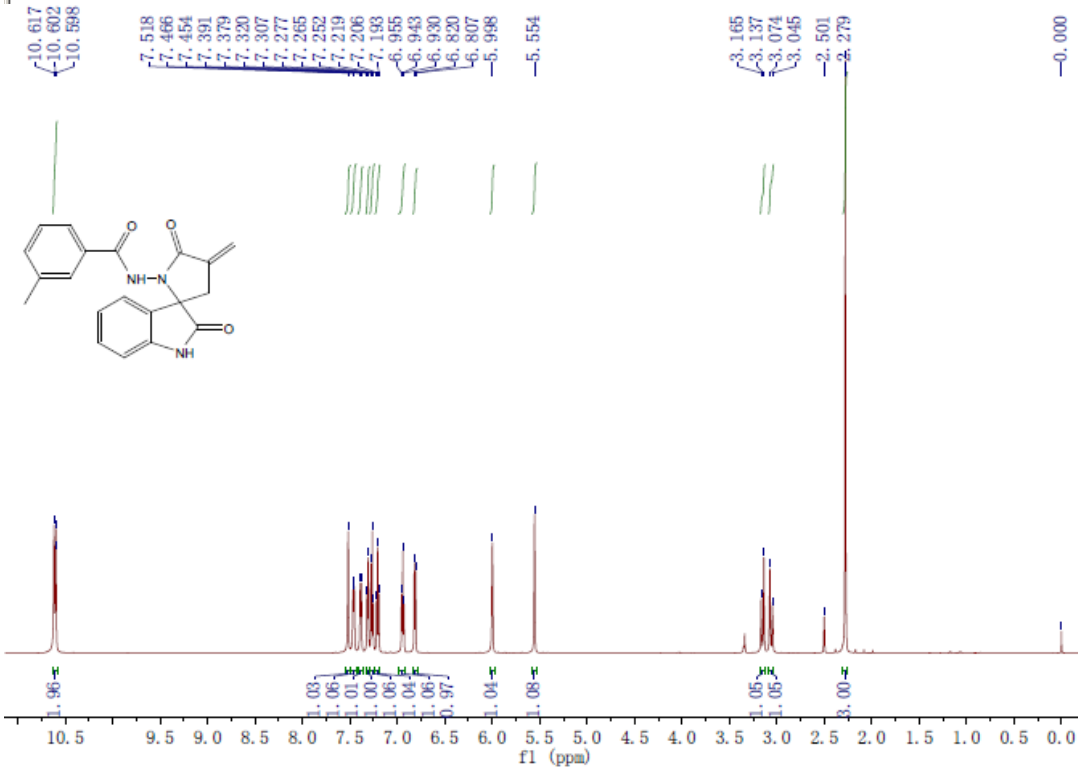

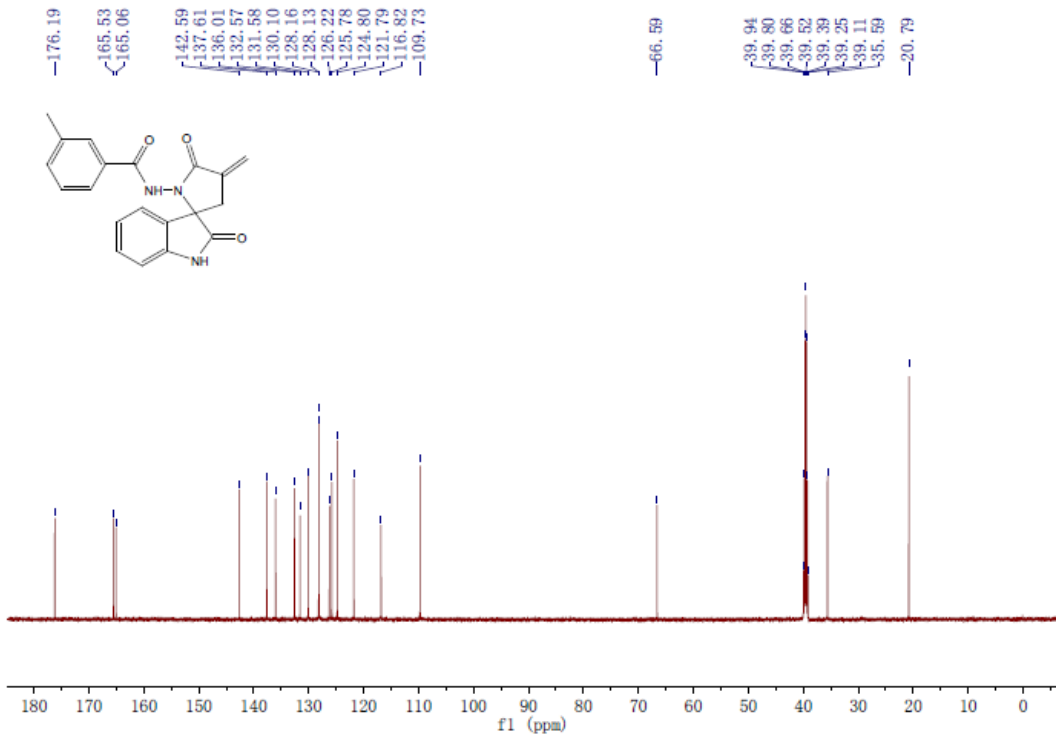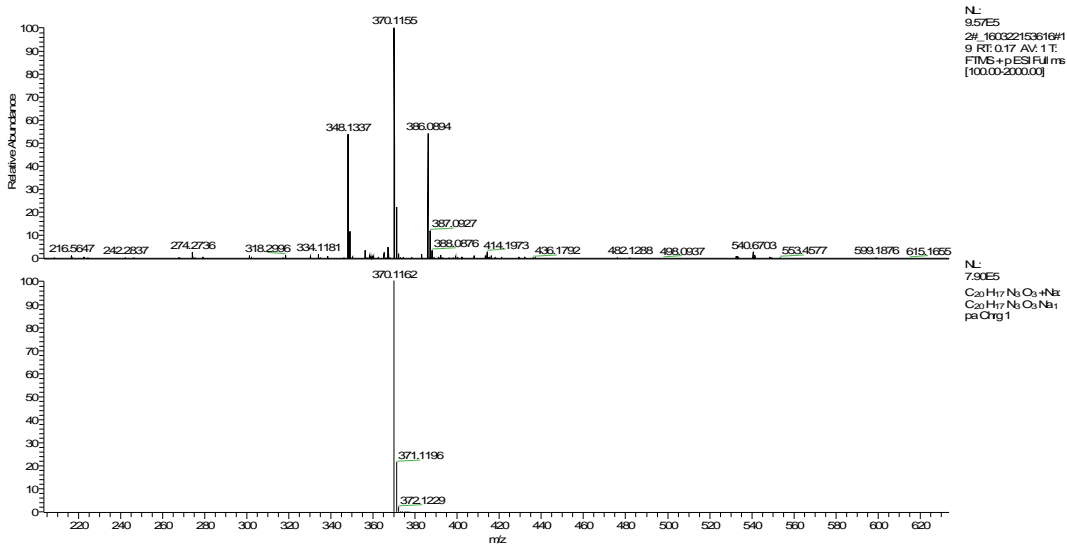



### 4-Methyl-N-(4'-methylene-2,5'-dioxospiro[indoline-3,2'-pyrrolidin]-1'-yl) -benzamide(4d)

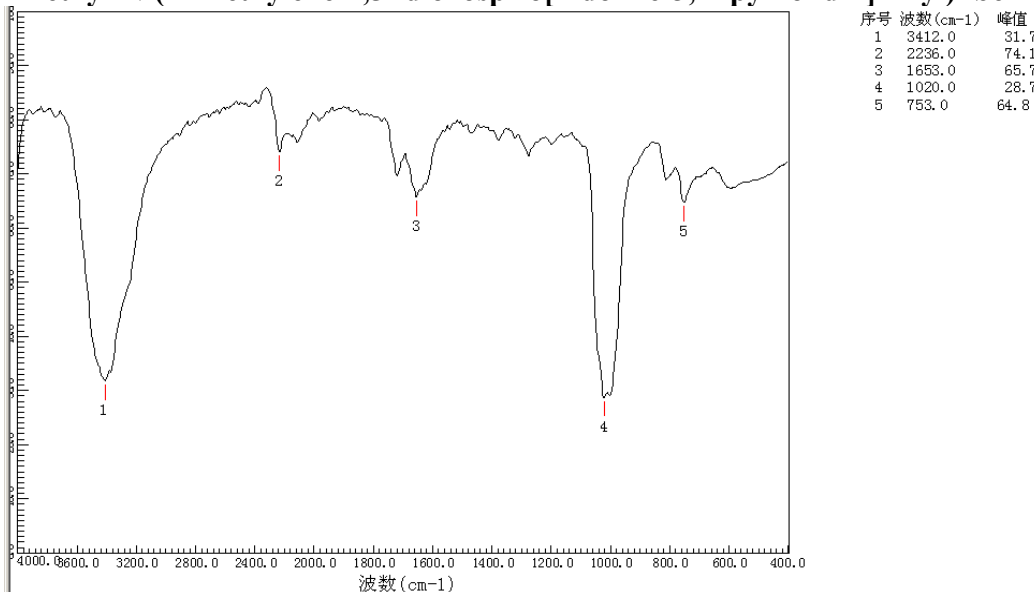

测试条件: 间隔: 3.0cm-1 狭缝: 正常 响应: 正常 温度: 湿度:  
 仪器名称: WGH-30/6型双光束红外分光光度计 生产厂家: 天津市港东科技发展有限公司  
 测试单位: 测试人:

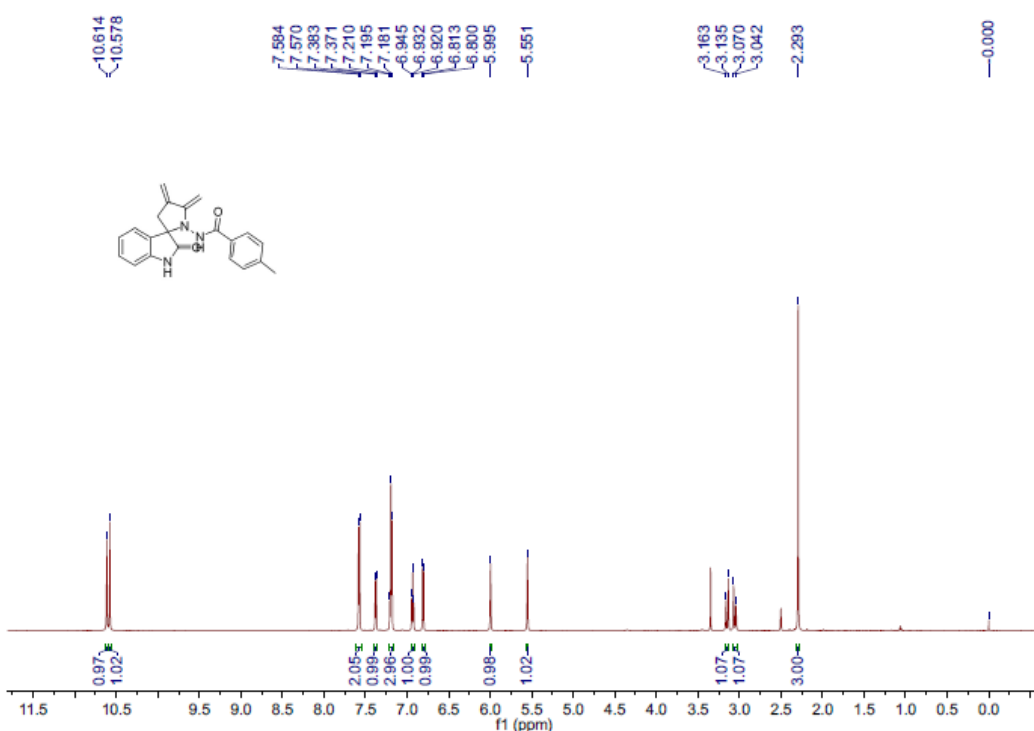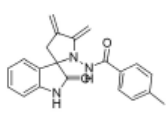

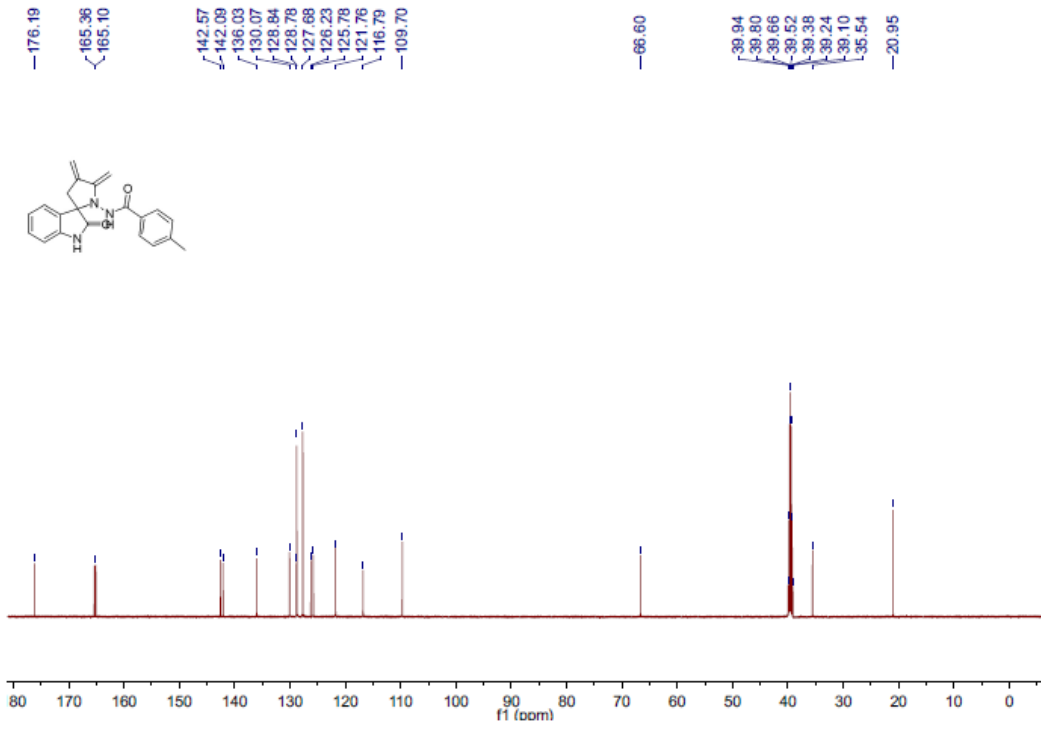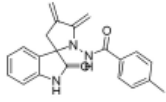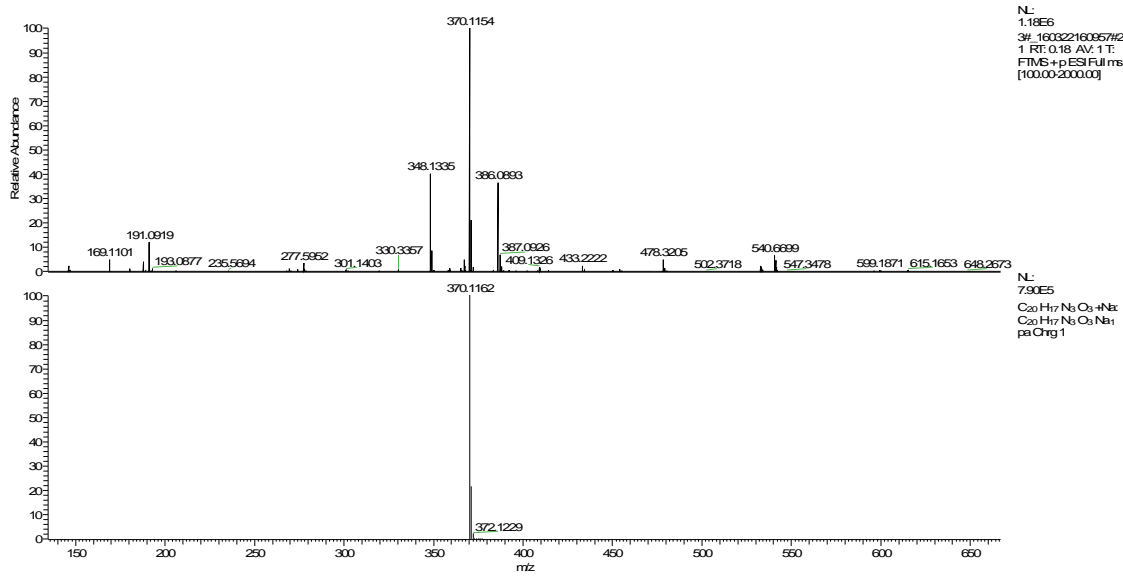

### 4-Methoxy-N-(4'-methylene-2,5'-dioxospiro[indoline-3,2'-pyrrolidin]-1'-yl)-benzamide(4e)

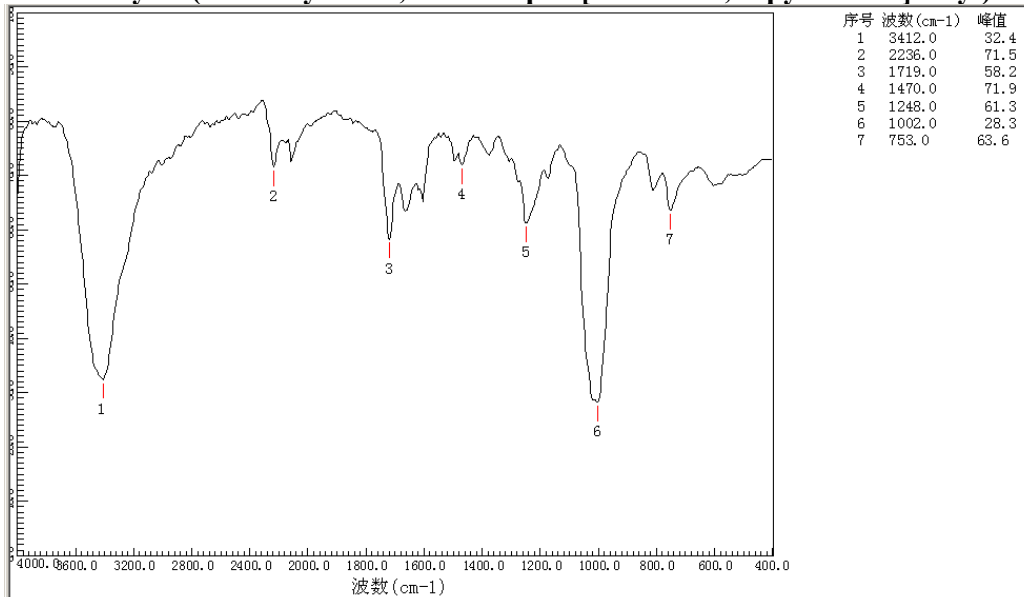

测试条件: 间隔: 3.0cm-1 狭缝: 正常 响应: 正常 温度: 湿度:  
 仪器名称: WGH-30/6型双光束红外分光光度计 生产厂家: 天津市港东科技发展有限公司  
 测试单位: 测试人:

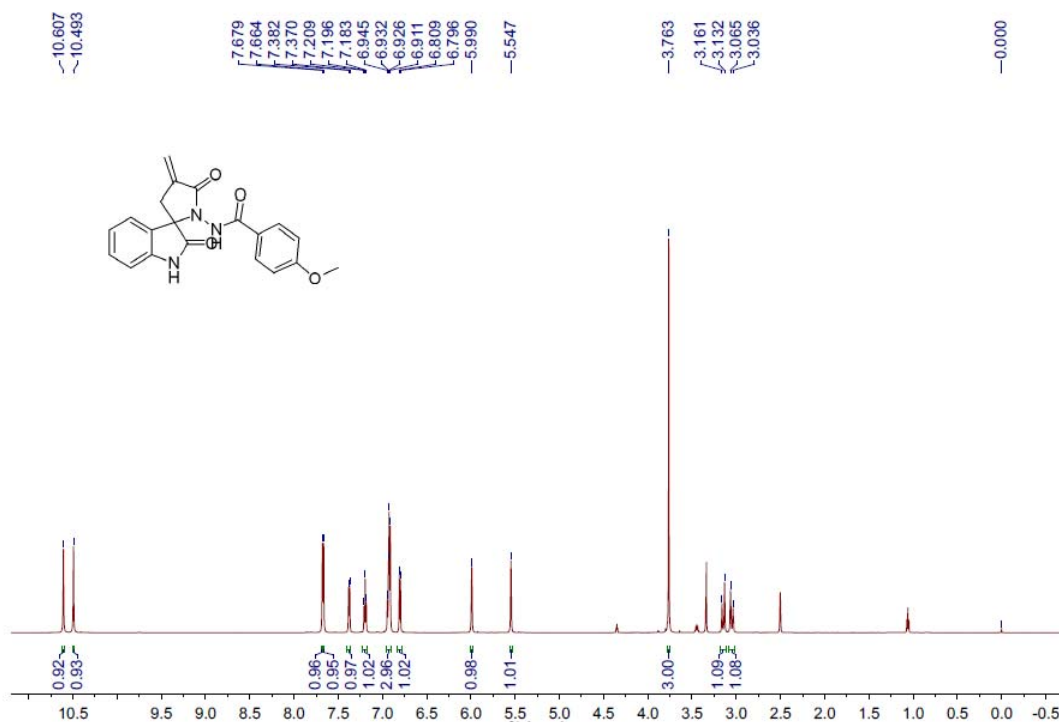

176.22  
 165.15  
 164.91  
 162.14  
 142.56  
 136.06  
 130.04  
 129.63  
 126.30  
 125.80  
 123.76  
 121.76  
 116.73  
 113.51  
 109.69  
 66.61  
 55.37  
 39.94  
 39.80  
 39.66  
 39.52  
 39.38  
 39.24  
 39.10  
 35.96

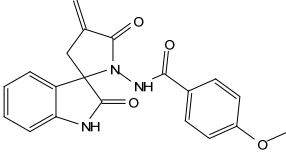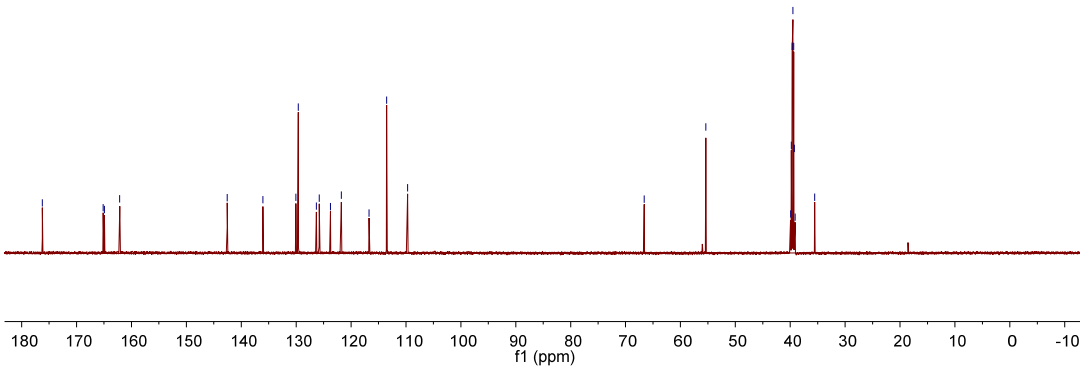

Error=1.6 ppm

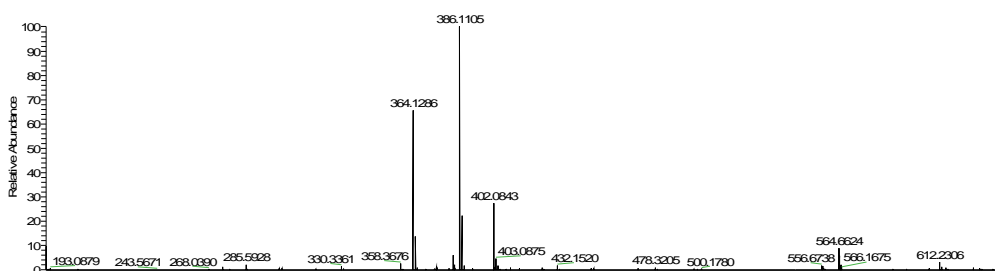

NL:  
 6.71E5  
 4#\_160322160957#4  
 RT: 0.03 AV: 1 T:  
 FTMS+p ESI Full ms  
 [100.00-2000.00]

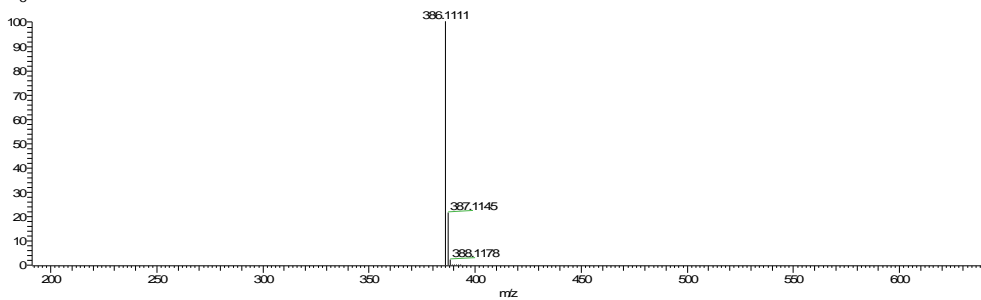

NL:  
 7.88E5  
 C<sub>20</sub>H<sub>17</sub>N<sub>3</sub>O<sub>4</sub>+Na  
 C<sub>20</sub>H<sub>17</sub>N<sub>3</sub>O<sub>4</sub>Na  
 pa Chrg 1

## 2-Chloro-N-(4'-methylene-2,5'-dioxospiro[indoline-3,2'-pyrrolidin]-1'-yl)-benzamide(4h)

样品名称:

日期:2016年05月16日

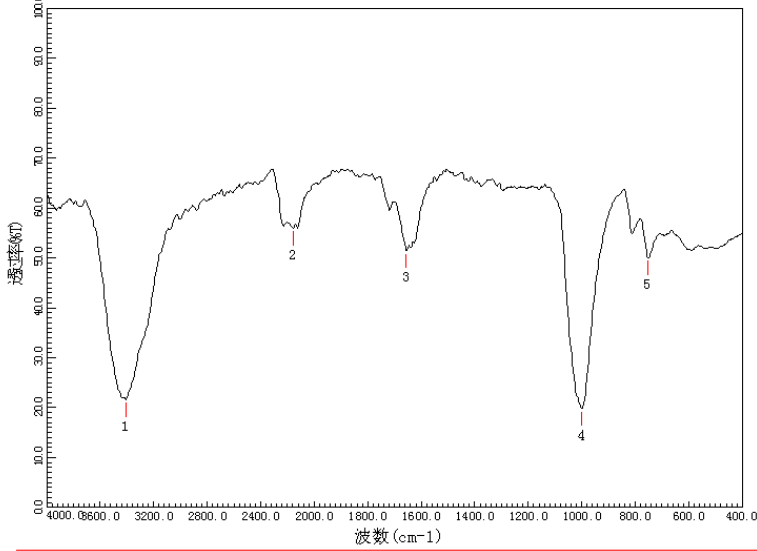

| 序号 | 波数(cm-1) | 峰值   |
|----|----------|------|
| 1  | 3406.0   | 21.6 |
| 2  | 2158.0   | 55.9 |
| 3  | 1656.0   | 51.5 |
| 4  | 999.0    | 19.8 |
| 5  | 753.0    | 50.0 |

测试条件: 间隔: 3.0cm-1 狭缝: 正常 响应: 正常 温度: 湿度:  
 仪器名称: WGH-30/6型双光束红外分光光度计 生产厂家: 天津市港东科技发展有限公司  
 测试单位: 测试人:

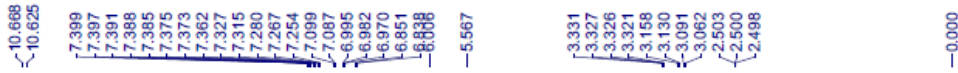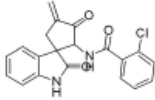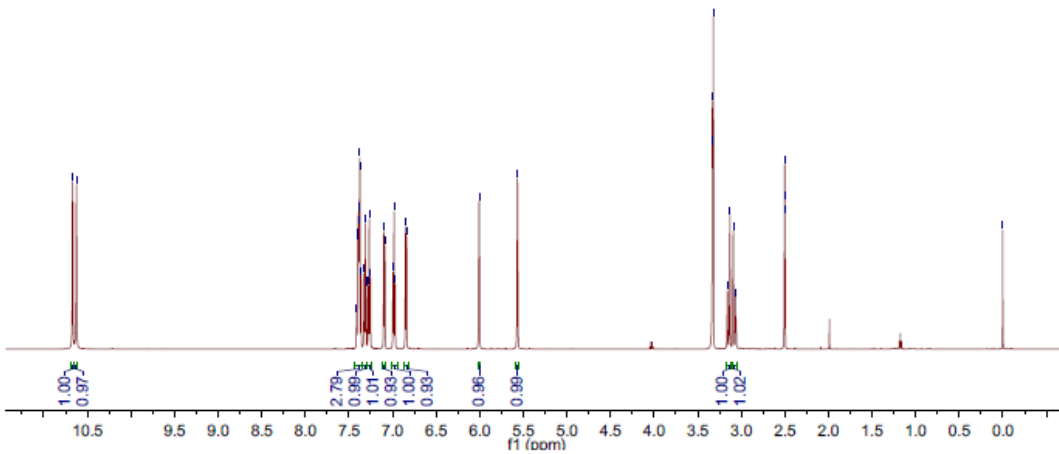

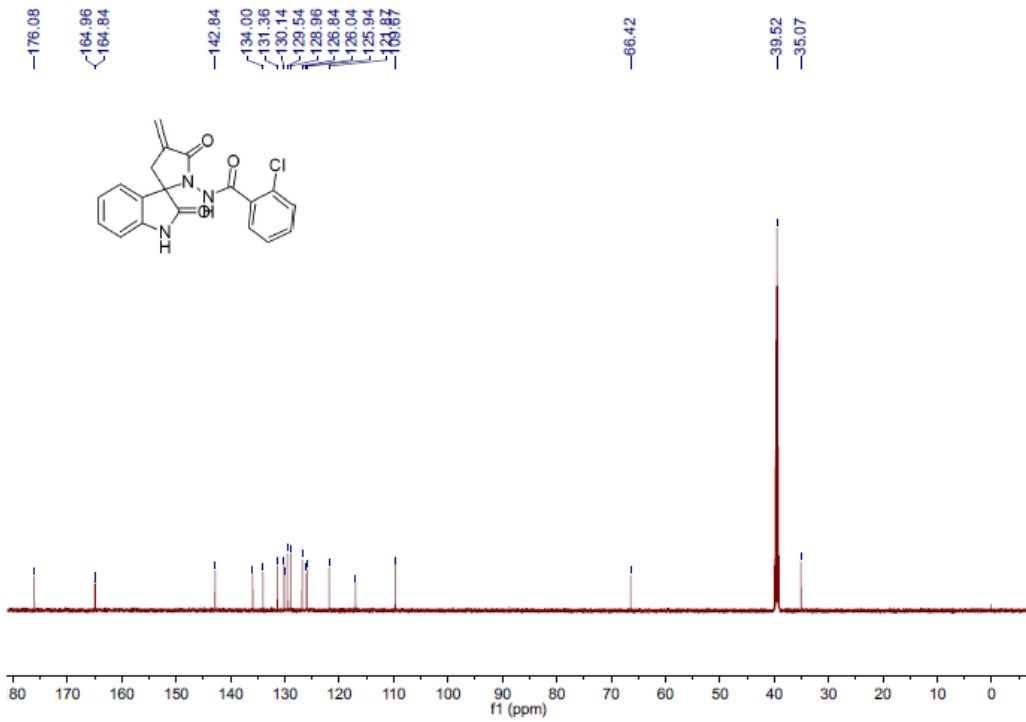

Error=0.8ppm

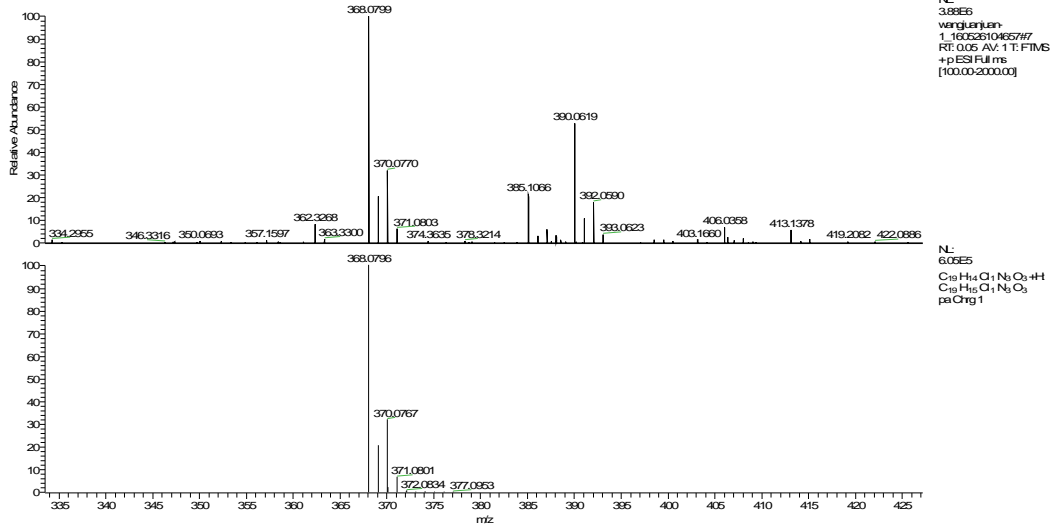

### 3-Chloro-N-(4'-methylene-2,5'-dioxospiro[indoline-3,2'-pyrrolidin]-1'-yl)-benzamide(4i)

样品名称:

日期:2016年05月16日

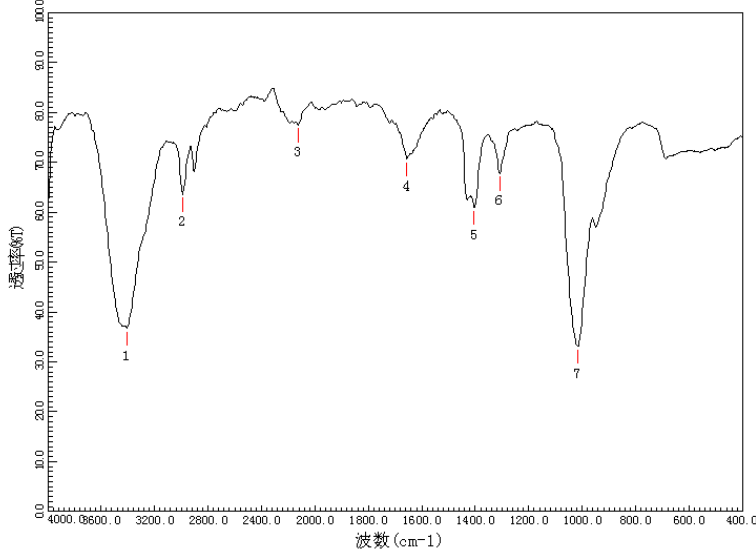

| 序号 | 波数 (cm <sup>-1</sup> ) | 峰值   |
|----|------------------------|------|
| 1  | 3406.0                 | 36.7 |
| 2  | 2992.0                 | 63.6 |
| 3  | 2122.0                 | 77.4 |
| 4  | 1656.0                 | 70.6 |
| 5  | 1404.0                 | 60.9 |
| 6  | 1308.0                 | 67.7 |
| 7  | 1017.0                 | 33.1 |

测试条件: 间隔: 3.0cm<sup>-1</sup> 狭缝: 正常 响应: 正常 温度: 湿度:  
 仪器名称: WGH-30/6型双光束红外分光光度计 生产厂家: 天津市港东科技发展有限公司  
 测试单位: 测试人:

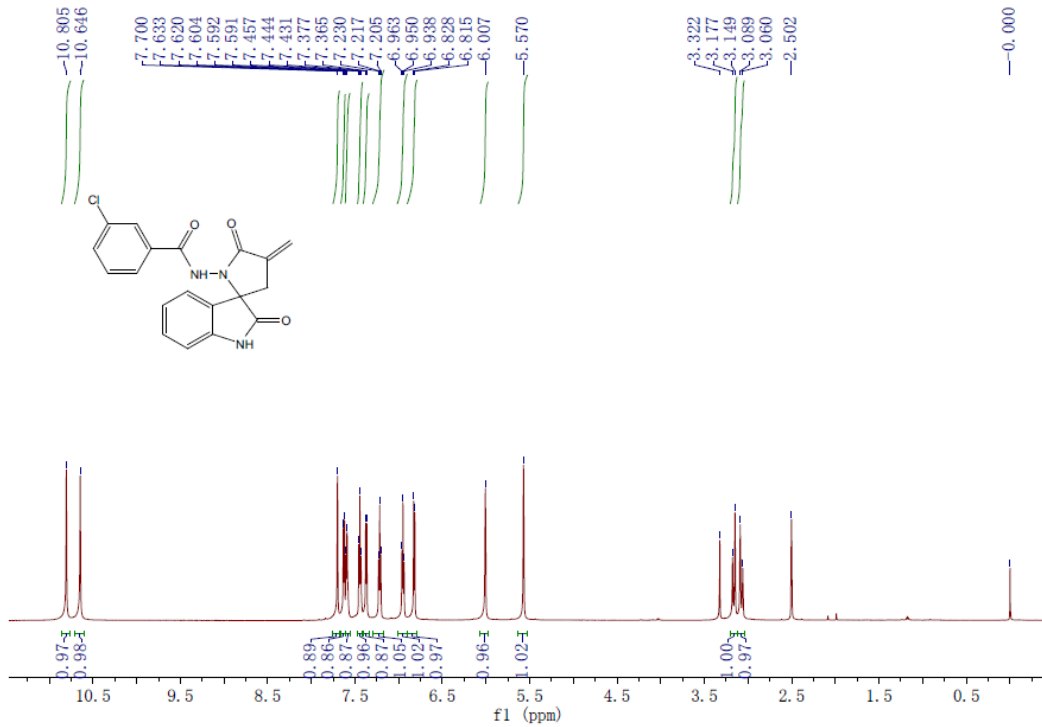

176.10  
 165.00  
 164.17  
 142.60  
 135.81  
 133.46  
 131.94  
 130.19  
 127.28  
 126.41  
 126.06  
 125.71  
 124.86  
 66.54  
 39.94  
 39.80  
 39.66  
 39.52  
 39.38  
 39.24  
 39.10  
 35.45

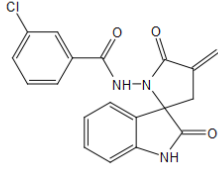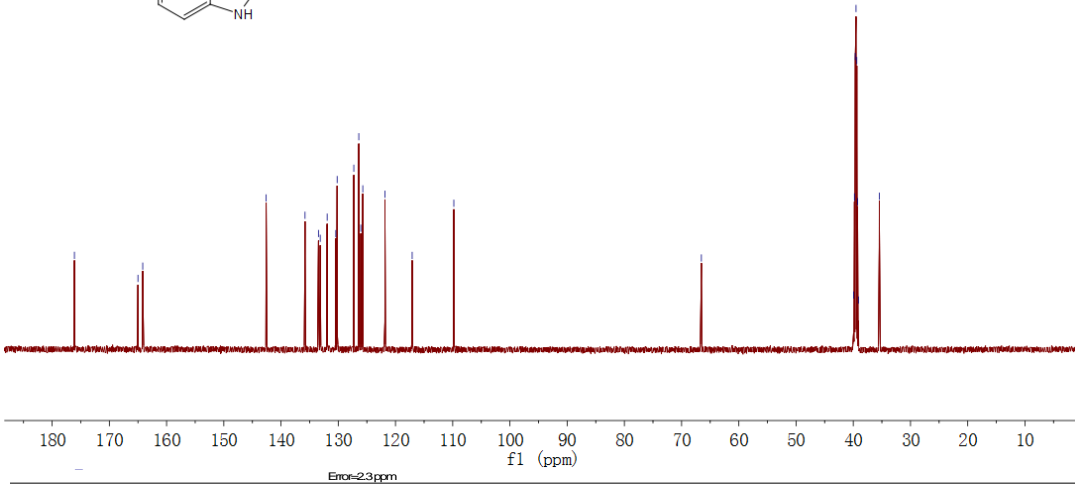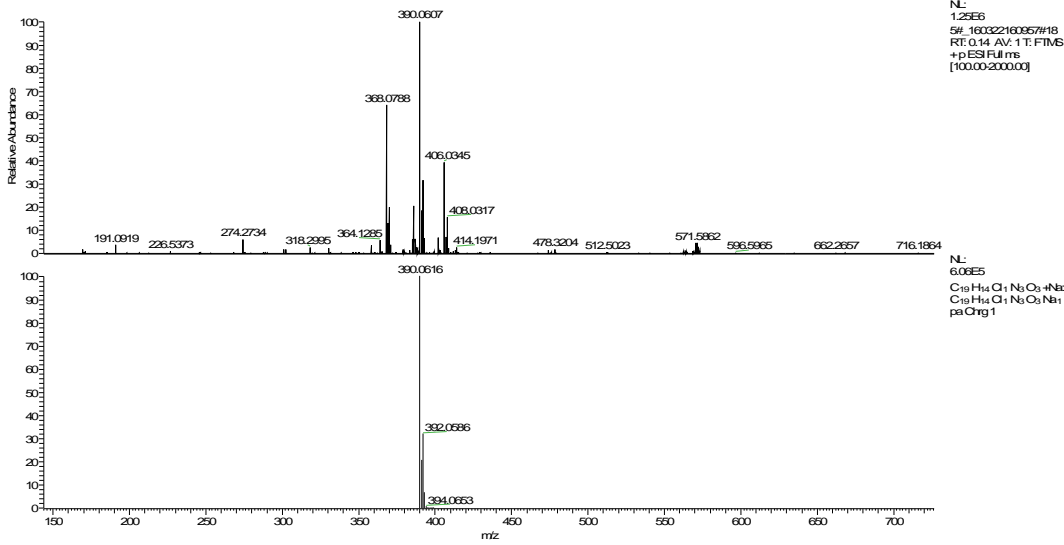



# 4-Chloro-N-(4'-methylene-2,5'-dioxospiro[indoline-3,2'-pyrrolidin]-1'-yl)-benzamide(4j)

样品名称:

日期:2016年05月16日

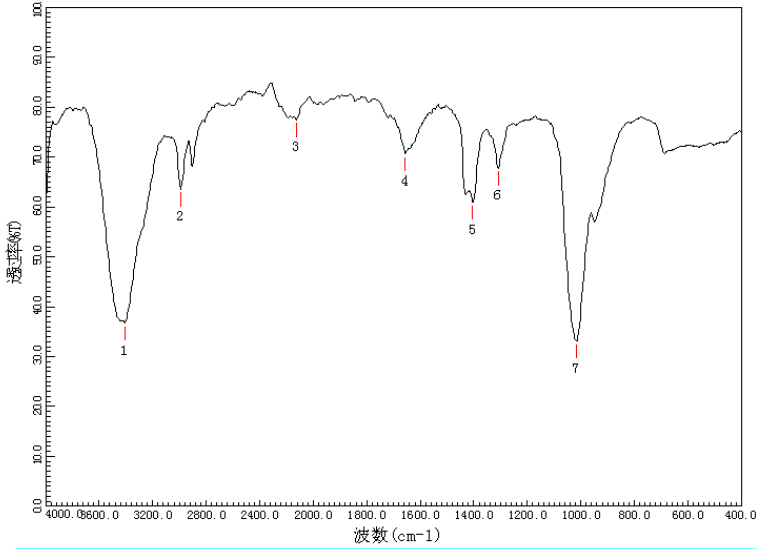

| 序号 | 波数(cm-1) | 峰值   |
|----|----------|------|
| 1  | 3406.0   | 36.7 |
| 2  | 2992.0   | 63.6 |
| 3  | 2122.0   | 77.4 |
| 4  | 1656.0   | 70.6 |
| 5  | 1404.0   | 60.9 |
| 6  | 1308.0   | 67.7 |
| 7  | 1017.0   | 33.1 |

测试条件: 间隔: 3.0cm-1 狭缝: 正常 响应: 正常 温度: 湿度:  
 仪器名称: WGH-30/6型双光束红外分光光度计 生产厂家: 天津市港东科技发展有限公司  
 测试单位: 测试人:

10.763 10.631 7.680 7.666 7.482 7.468 7.372 7.359 7.219 7.206 7.193 6.950 6.937 6.925 6.817 6.805 6.000 5.563 3.333 3.171 3.143 3.081 3.052 2.500

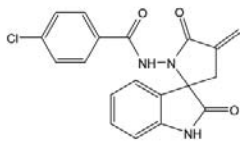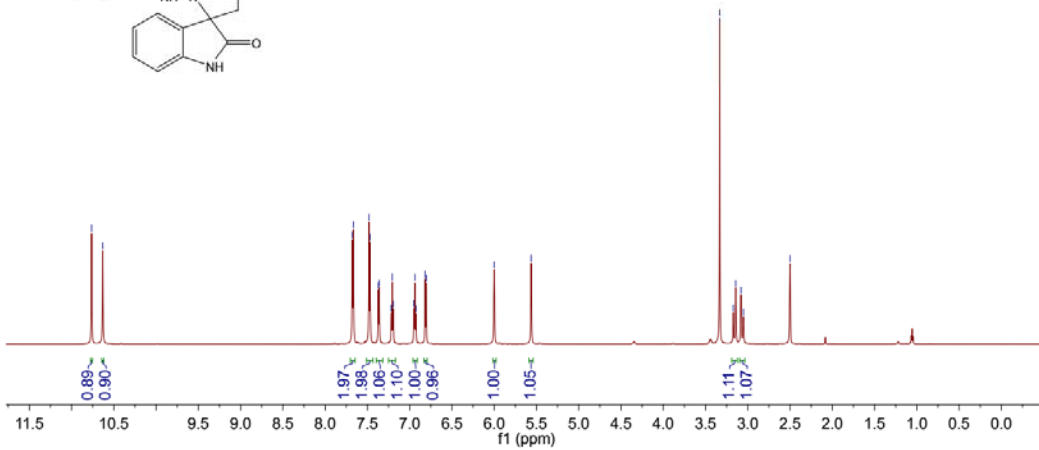

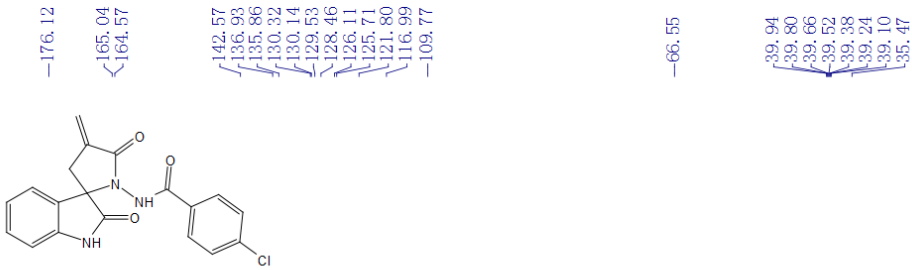

176.12  
165.04  
164.57  
142.57  
136.93  
135.86  
130.32  
130.14  
129.53  
128.96  
126.11  
125.71  
121.80  
116.99  
109.77  
66.55  
39.94  
39.80  
39.66  
39.52  
39.38  
39.24  
39.10  
35.47

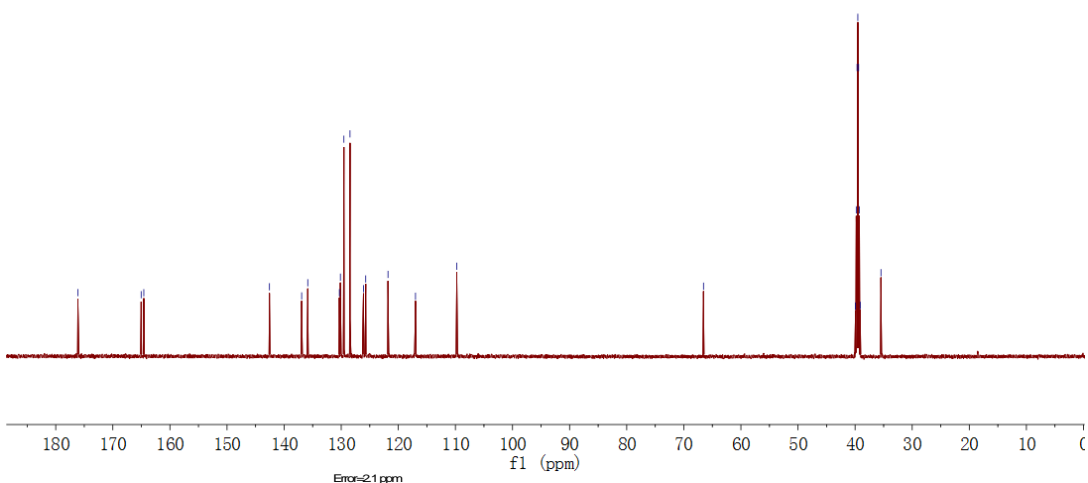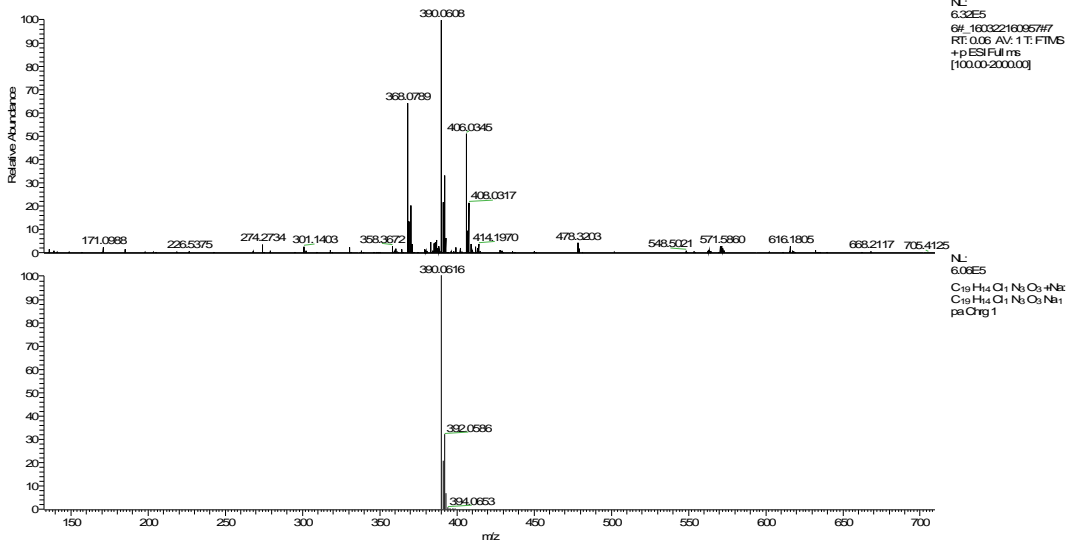

**4-Bromo-N-(4'-methylene-2,5'-dioxospiro[indoline-3,2'-pyrrolidin]-1'-yl)-benzamide(4k)**

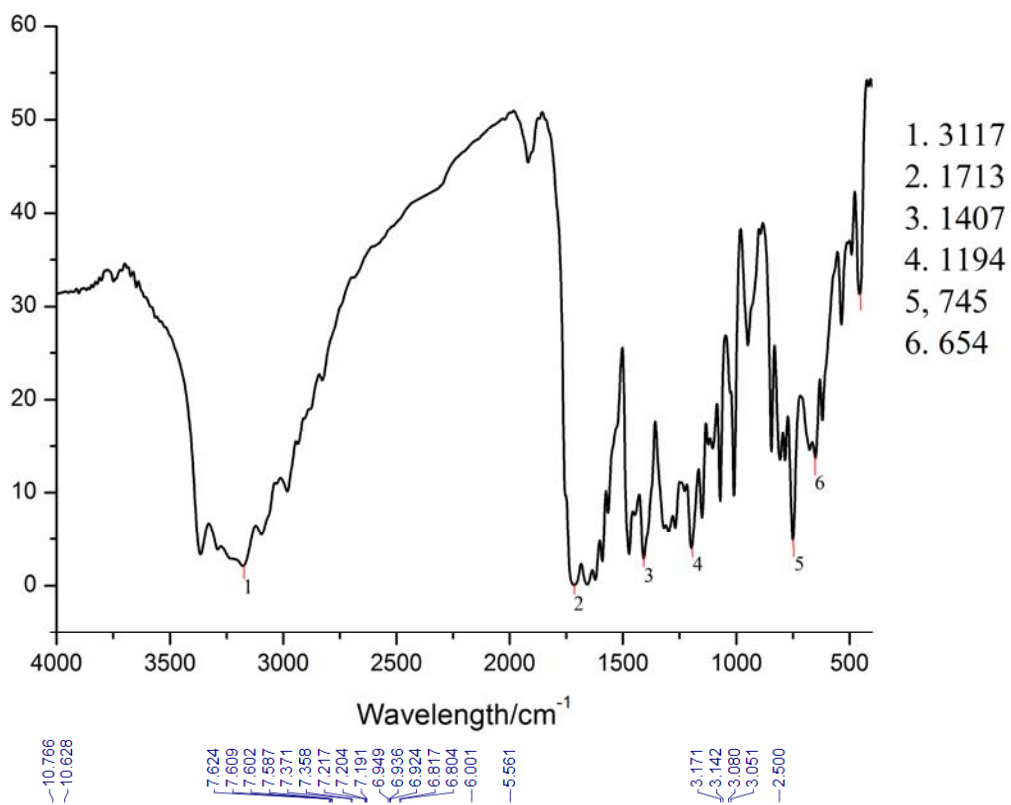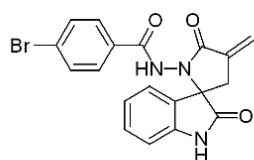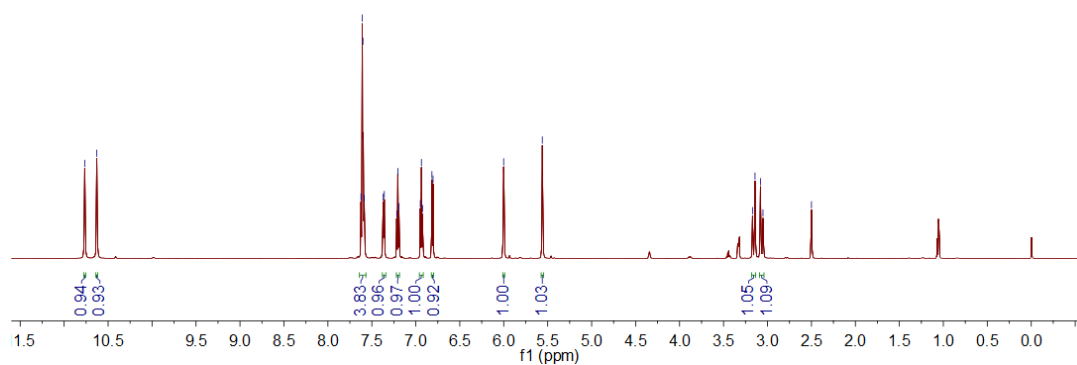

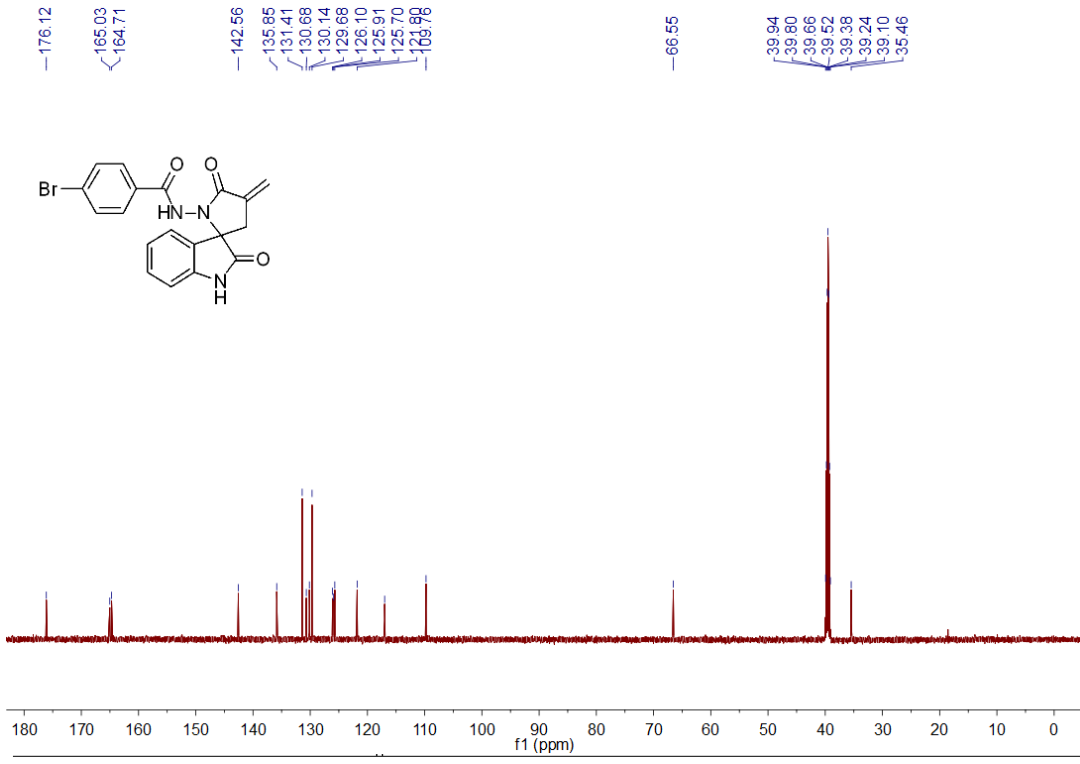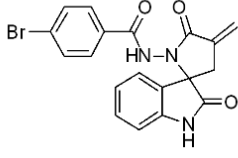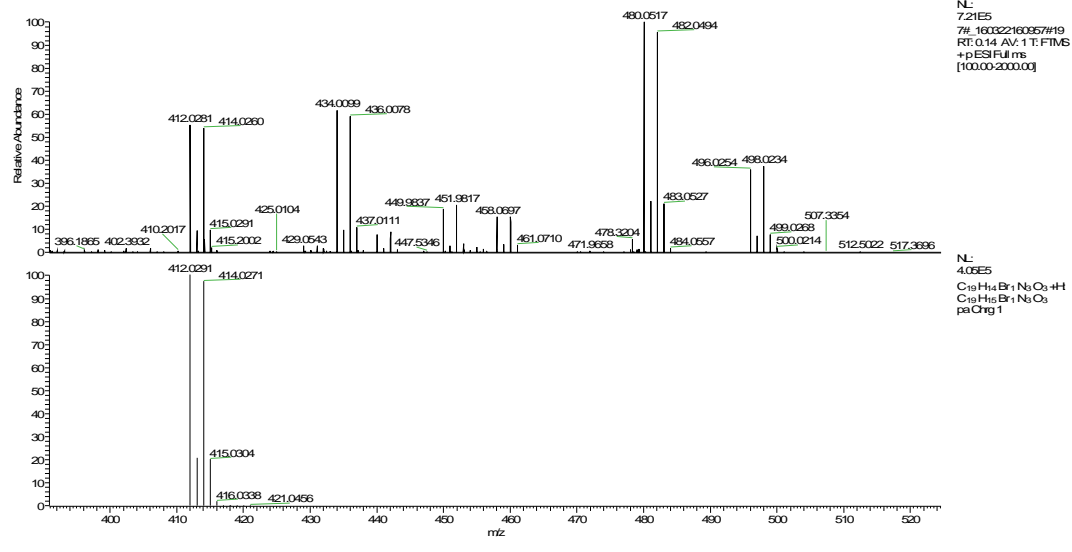

**4-Fluoro-N-(4'-methylene-2,5'-dioxospiro[indoline-3,2'-pyrrolidin]-1'-yl)benzamide(4I)**

样品名称:

日期: 2016年05月16日

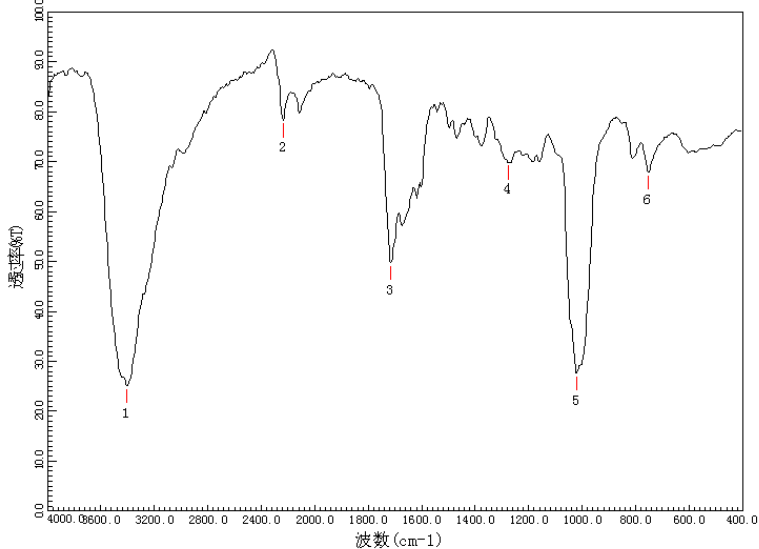

| 序号 | 波数 (cm-1) | 峰值   |
|----|-----------|------|
| 1  | 3406.0    | 25.1 |
| 2  | 2236.0    | 78.2 |
| 3  | 1716.0    | 49.7 |
| 4  | 1275.0    | 69.9 |
| 5  | 1020.0    | 27.6 |
| 6  | 753.0     | 67.8 |

测试条件: 间隔: 3.0cm-1 狭缝: 正常 响应: 正常 温度: 湿度:  
 仪器名称: WGH-30/6型双光束红外分光光度计 生产厂家: 天津市港东科技发展有限公司  
 测试单位: 测试人:

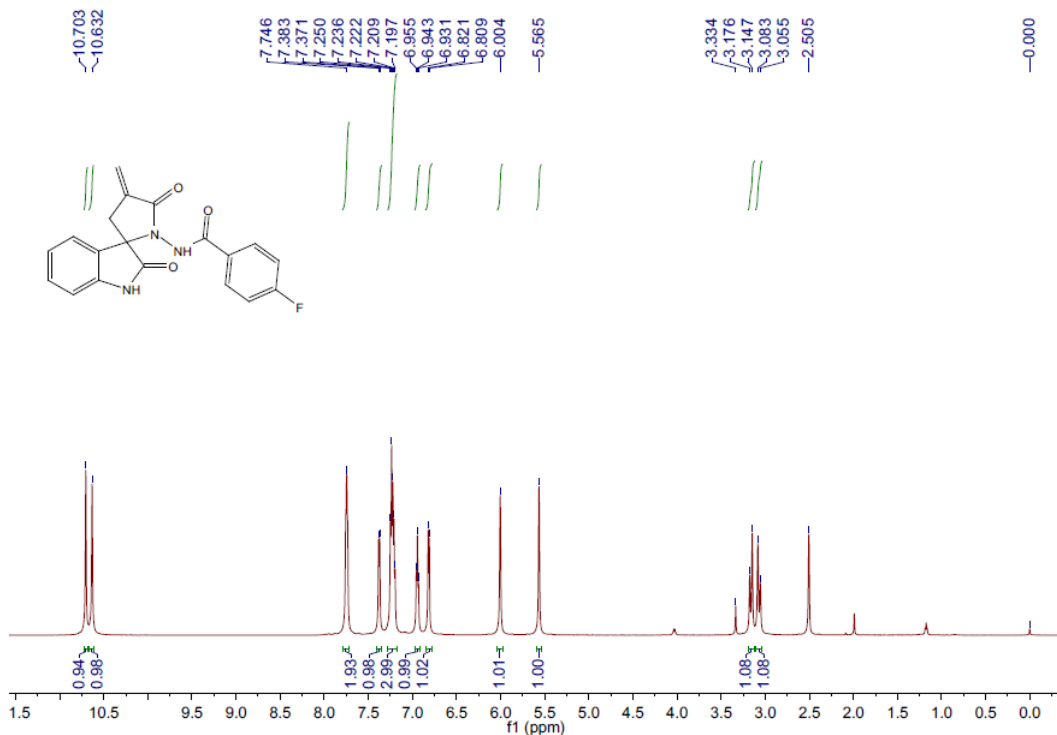

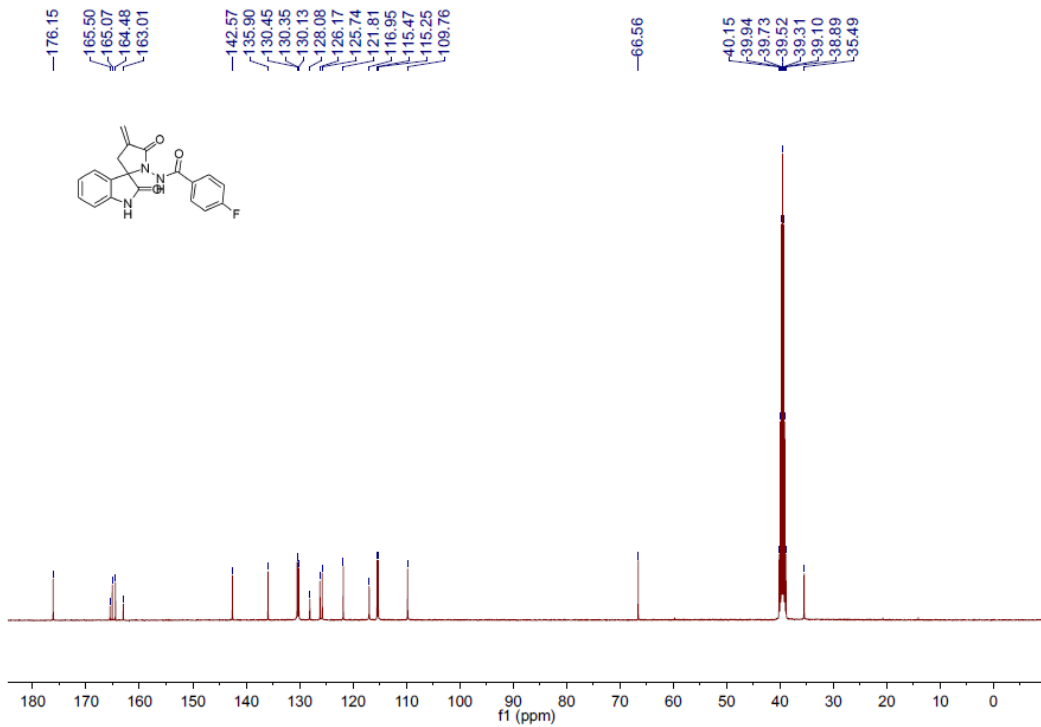

Error=27 ppm

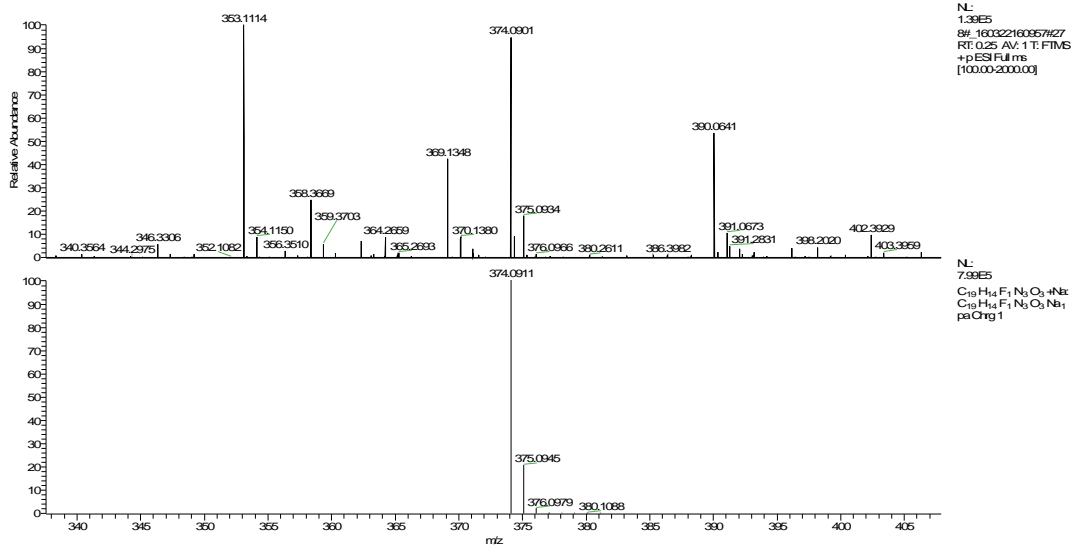

**Methyl 4-((4'-methylene-2,5'-dioxospiro[indoline-3,2'-pyrrolidin]-1'-yl)carbamoyl)- benzoate(4n)**

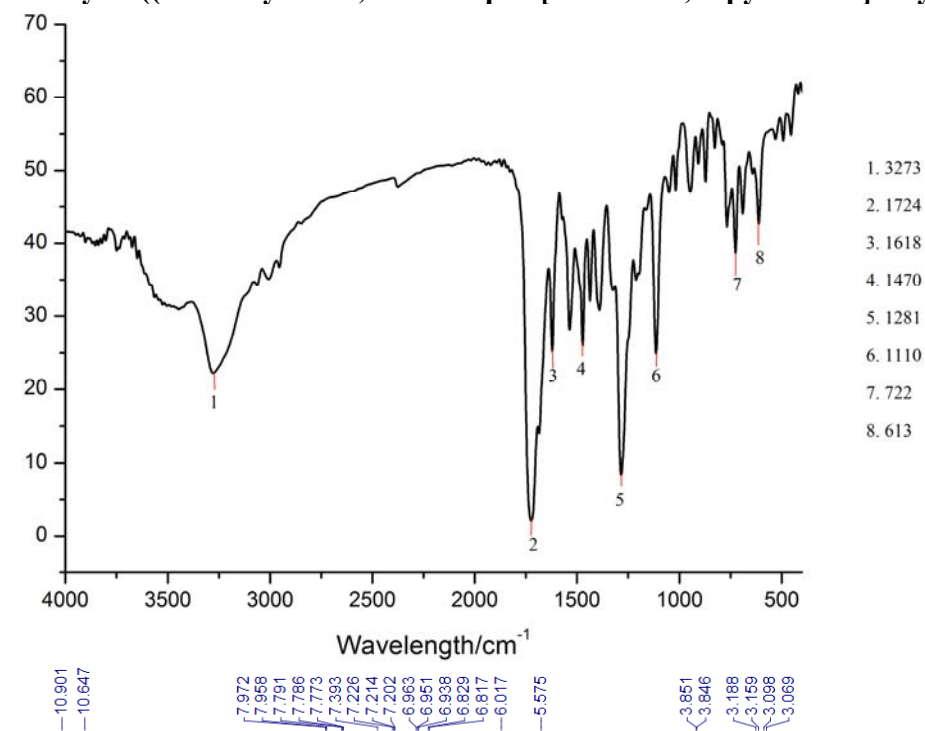

Wavelength/cm<sup>-1</sup>

10.901, 10.647, 7.972, 7.958, 7.791, 7.766, 7.773, 7.393, 7.226, 7.214, 7.202, 6.963, 6.951, 6.938, 6.829, 6.817, 6.017, 5.575, 3.851, 3.846, 3.188, 3.159, 3.098, 3.069, -0.000

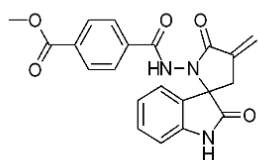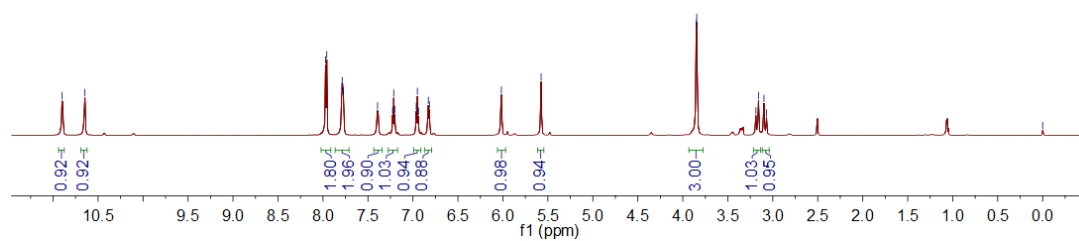

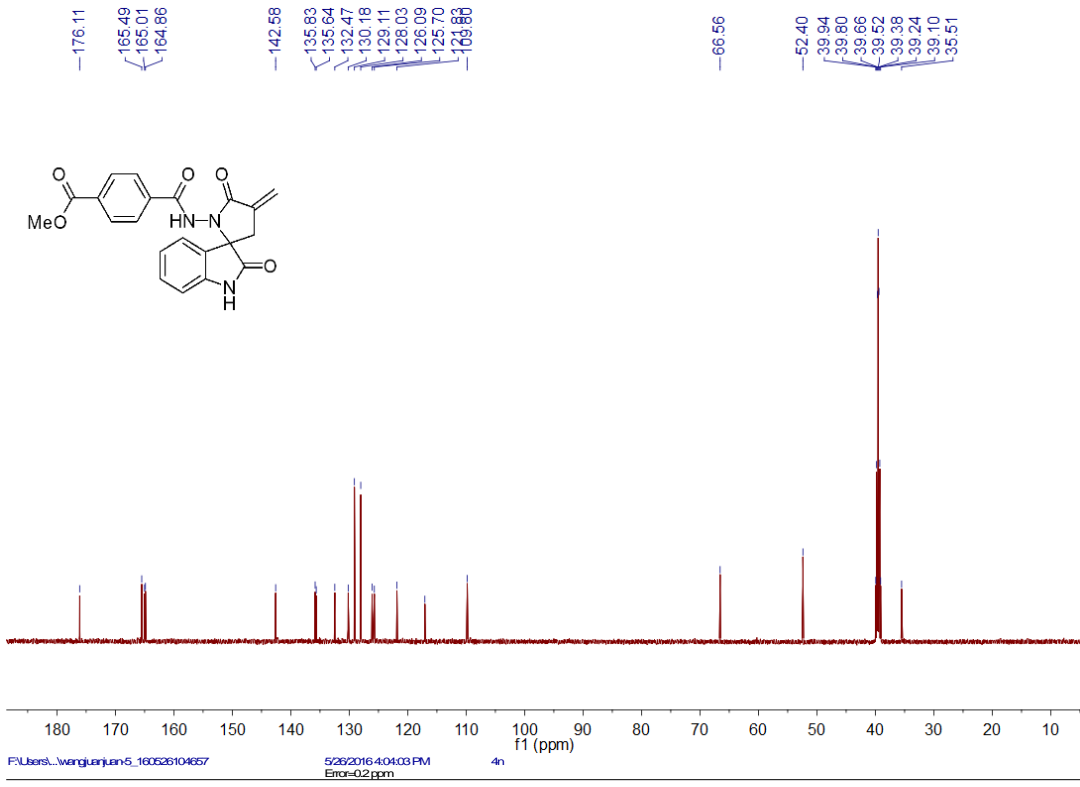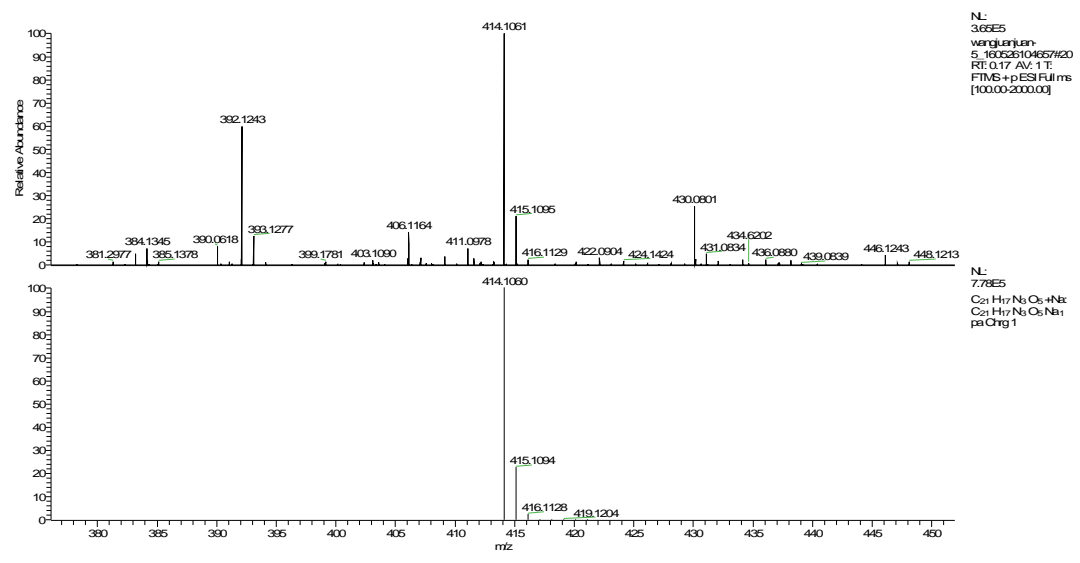



**N-(4'-Methylene-2,5'-dioxospiro[indoline-3,2'-pyrrolidin]-1'-yl)-4-(trifluoromethyl)benzamide(4o)**

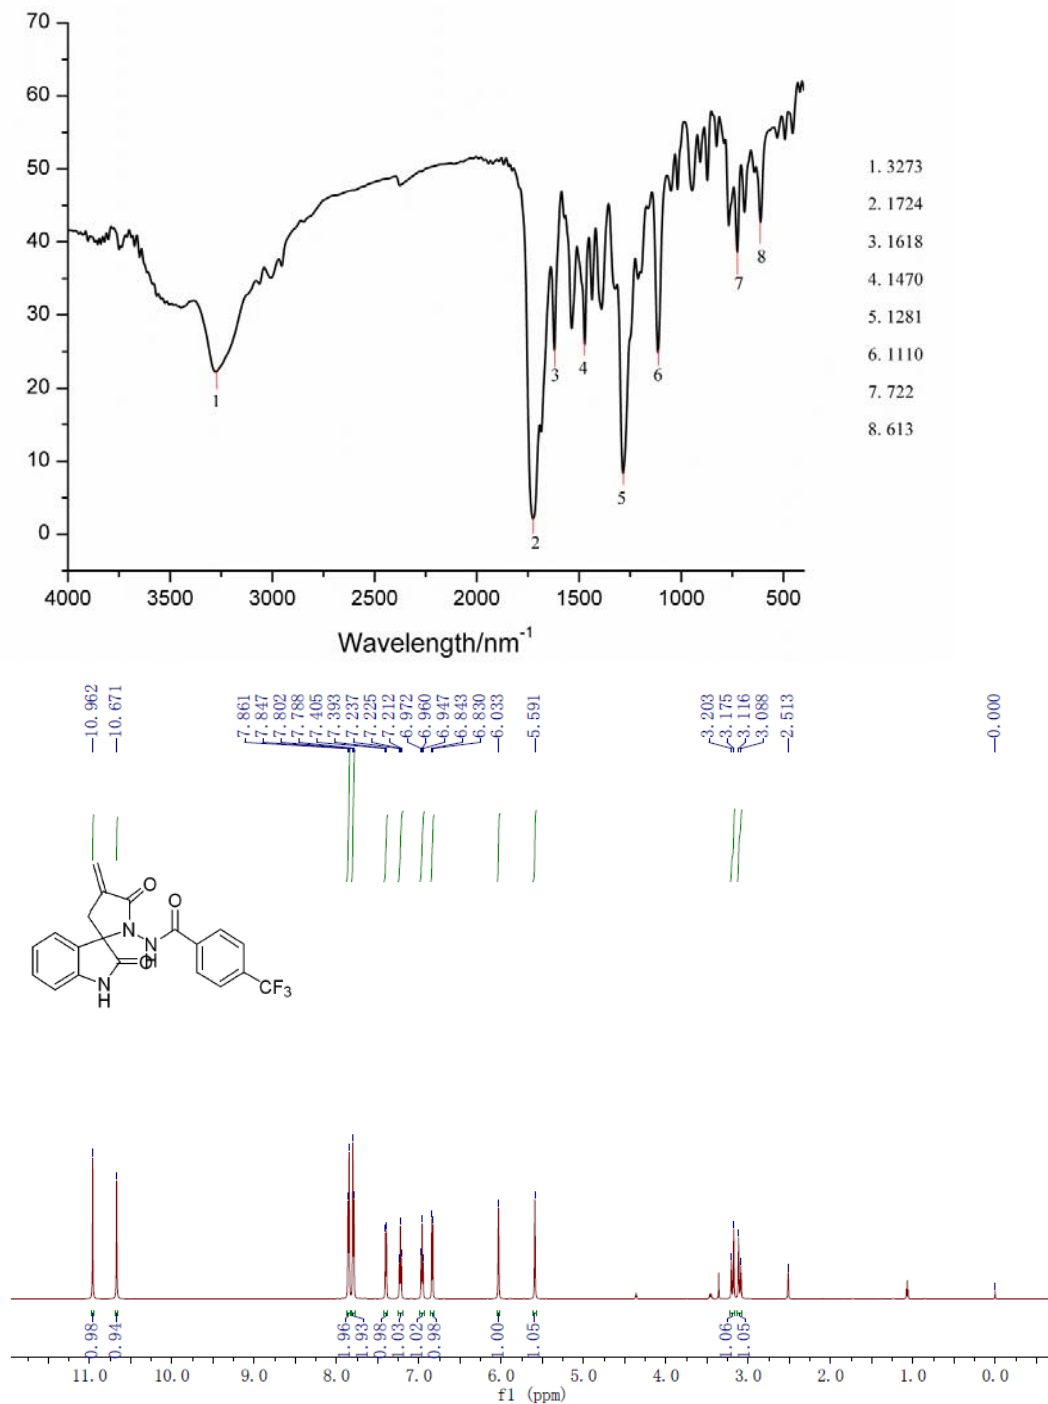

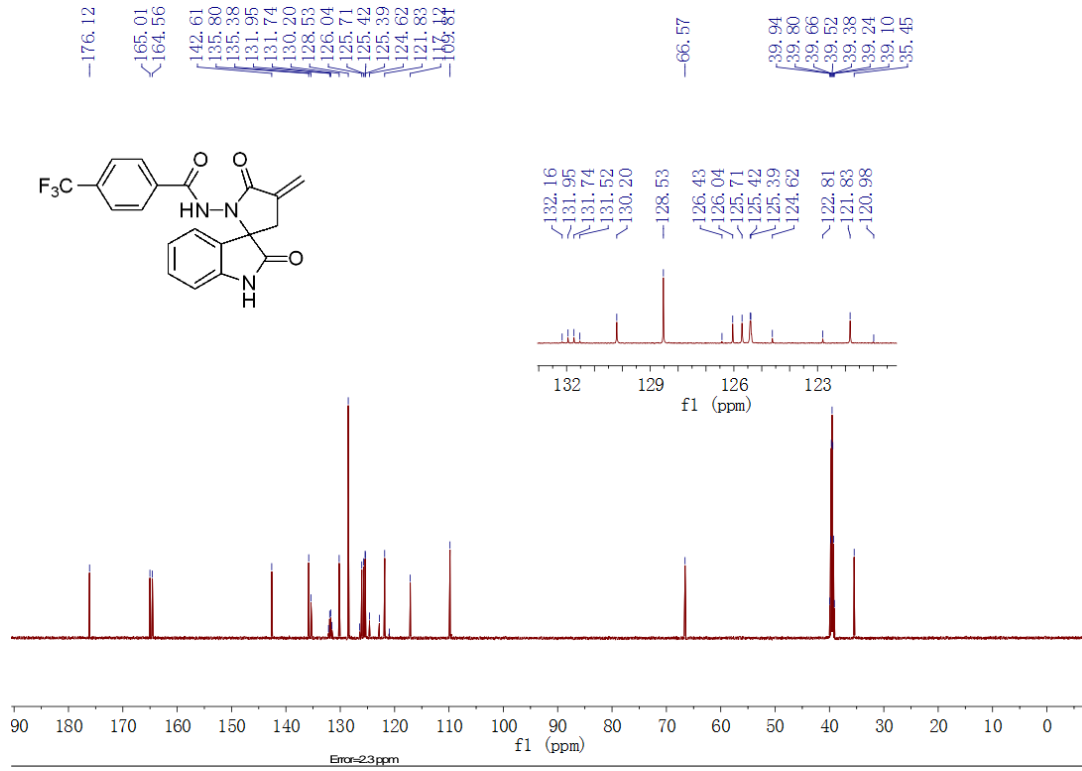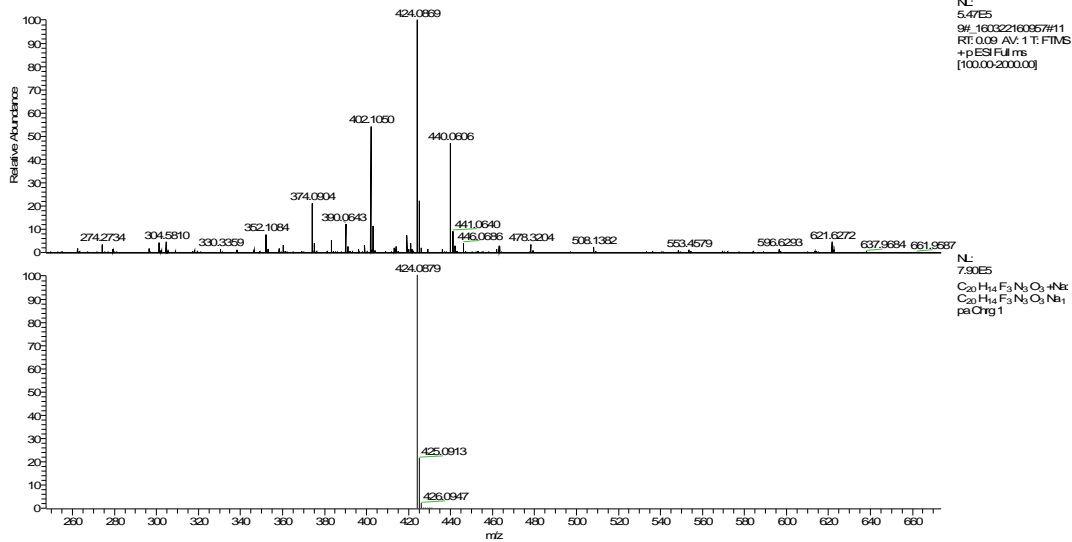

# 4-Chloro-N-(5-methyl-4'-methylene-2,5'-dioxospiro[indoline-3,2'-pyrrolidin] -1'-yl)-benzamide(4q)

样品名称:

日期:2016年05月16日

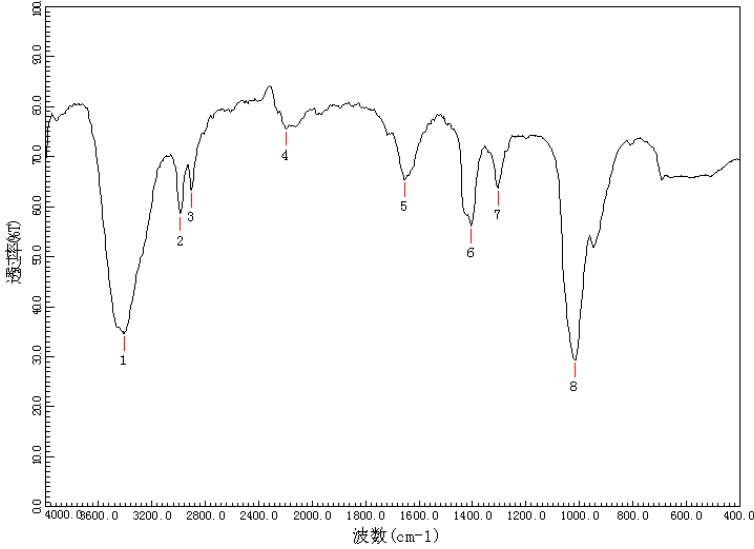

| 序号 | 波数 (cm-1) | 峰值   |
|----|-----------|------|
| 1  | 3406.0    | 34.6 |
| 2  | 2986.0    | 58.6 |
| 3  | 2902.0    | 63.3 |
| 4  | 2194.0    | 75.6 |
| 5  | 1653.0    | 65.4 |
| 6  | 1404.0    | 56.1 |
| 7  | 1305.0    | 63.7 |
| 8  | 1017.0    | 29.4 |

测试条件: 间隔: 3.0cm-1 狭缝: 正常 响应: 正常 温度: 湿度:  
 仪器名称: WGH-30/6型双光束红外分光光度计 生产厂家: 天津市港东科技发展有限公司  
 测试单位: 测试人:

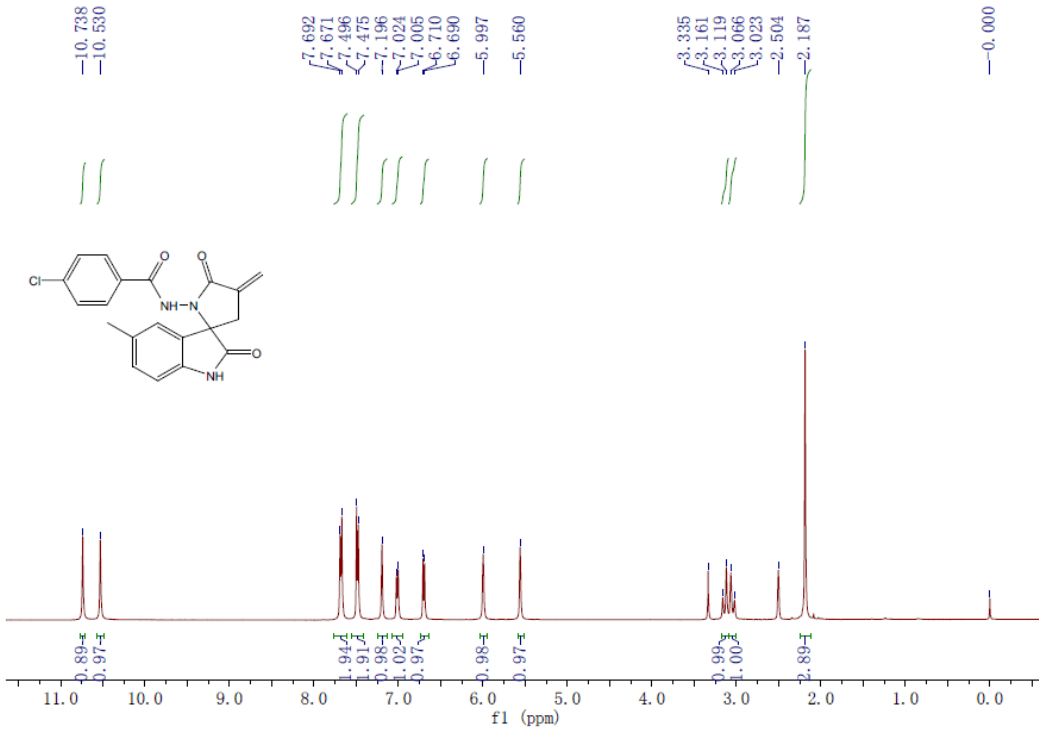

-1.76, 05  
 -1.65, 01  
 -1.64, 60  
 -1.40, 05  
 -1.36, 90  
 -1.35, 88  
 -1.30, 61  
 -1.30, 43  
 -1.30, 34  
 -1.29, 55  
 -1.28, 46  
 -1.26, 28  
 -1.16, 96  
 -1.09, 47  
 -66, 62  
 -39, 94  
 -39, 80  
 -39, 66  
 -39, 52  
 -39, 38  
 -39, 24  
 -39, 10  
 -35, 52  
 -20, 68

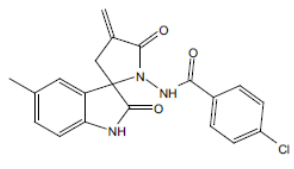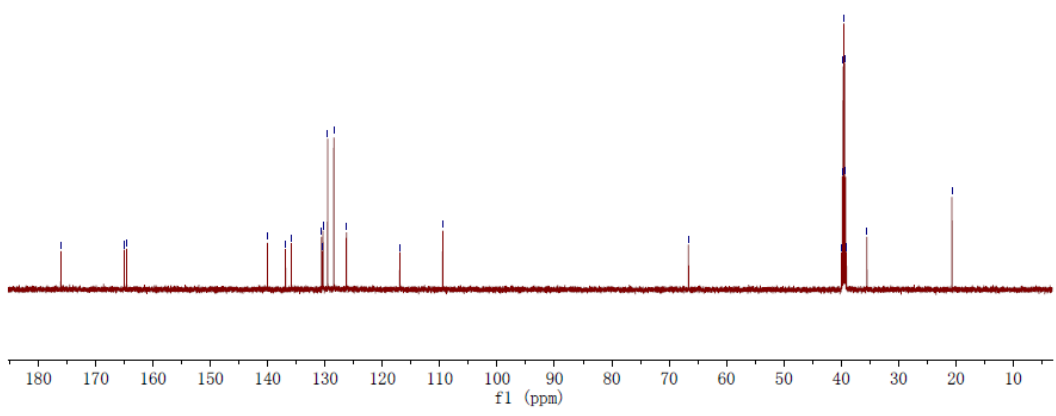

Error=25 ppm

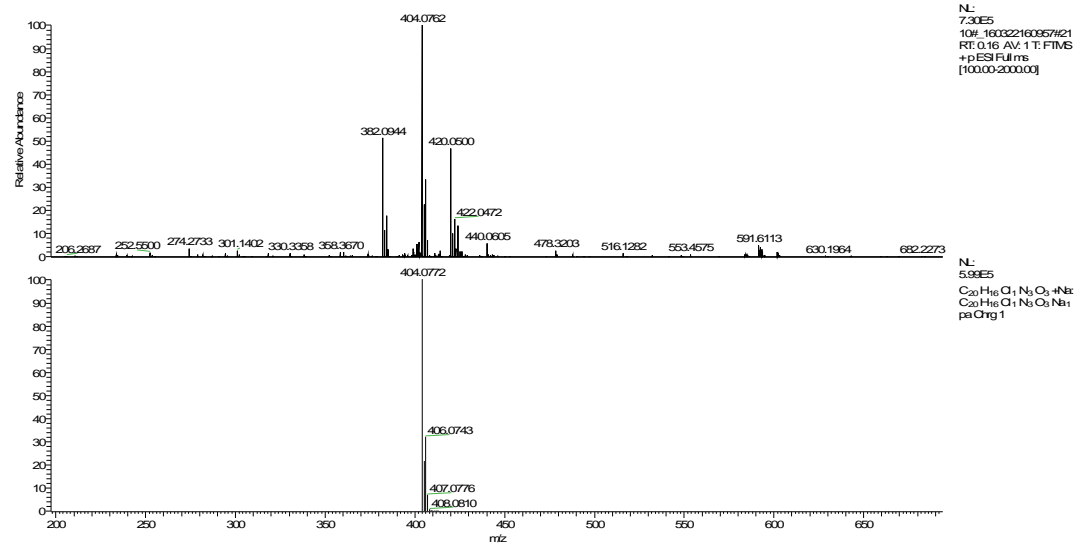

# 4-Chloro-N-(5-chloro-4'-methylene-2,5'-dioxospiro[indoline-3,2'-pyrrolidin]-1'-yl)-benzamide(4r)

样品名称:

日期: 2016年05月16日

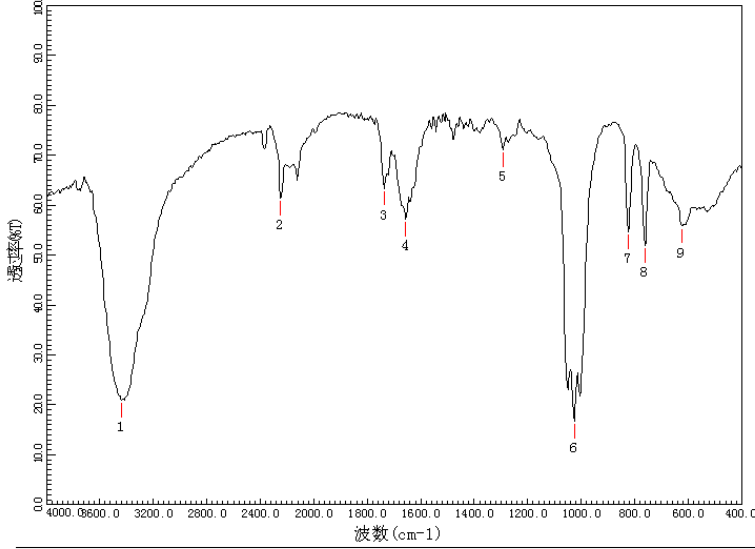

| 序号 | 波数(cm-1) | 峰值   |
|----|----------|------|
| 1  | 3436.0   | 20.9 |
| 2  | 2248.0   | 61.4 |
| 3  | 1737.0   | 63.4 |
| 4  | 1656.0   | 57.2 |
| 5  | 1293.0   | 71.2 |
| 6  | 1026.0   | 16.8 |
| 7  | 825.0    | 54.7 |
| 8  | 762.0    | 51.9 |
| 9  | 624.0    | 55.8 |

测试条件: 间隔: 3.0cm-1 狭缝: 正常 响应: 正常 温度: 湿度:  
 仪器名称: WGH-30/6型双光束红外分光光度计 生产厂家: 天津市港东科技发展有限公司  
 测试单位: 测试人:

10.825  
10.777  
7.706  
7.682  
7.509  
7.495  
7.423  
7.277  
7.263  
6.836  
6.822  
-6.017  
-5.584  
-3.332  
-3.168  
-2.509  
-2.506  
-2.504  
-0.000

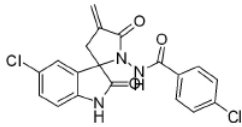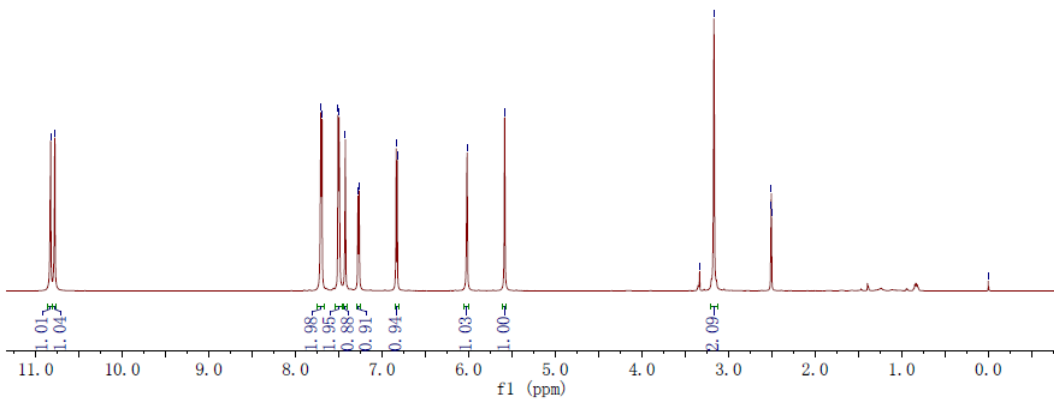

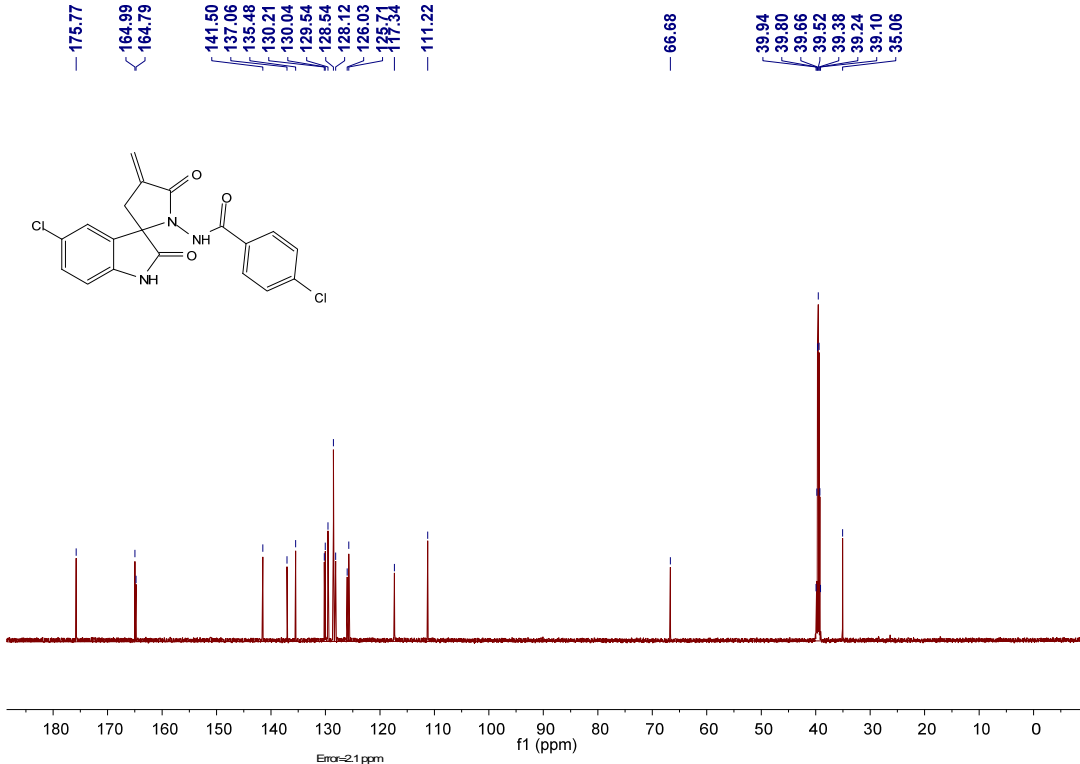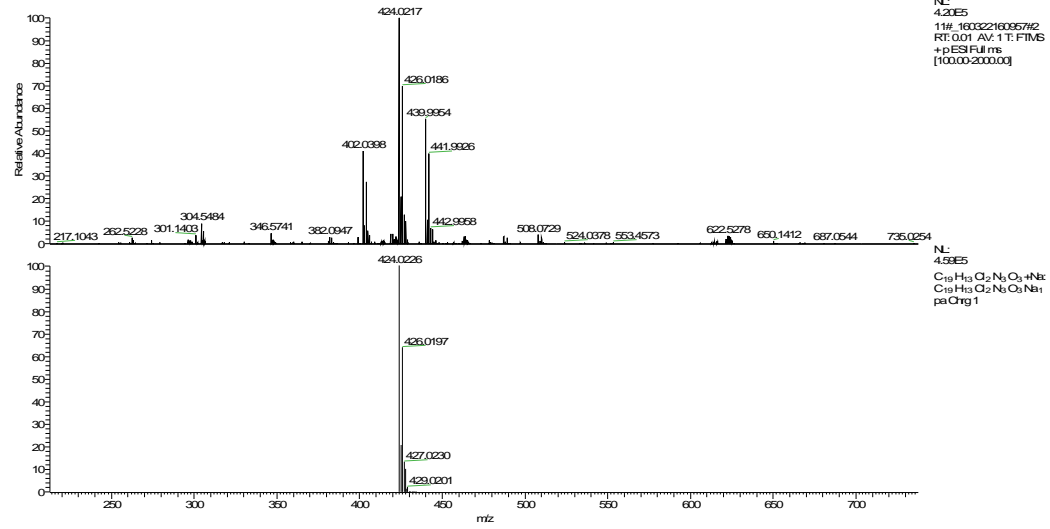

**N-(1-Benzyl-4'-methylene-2,5'-dioxospiro[indoline-3,2'-pyrrolidin]-1'-yl) -4-chlorobenzamide(4s)**

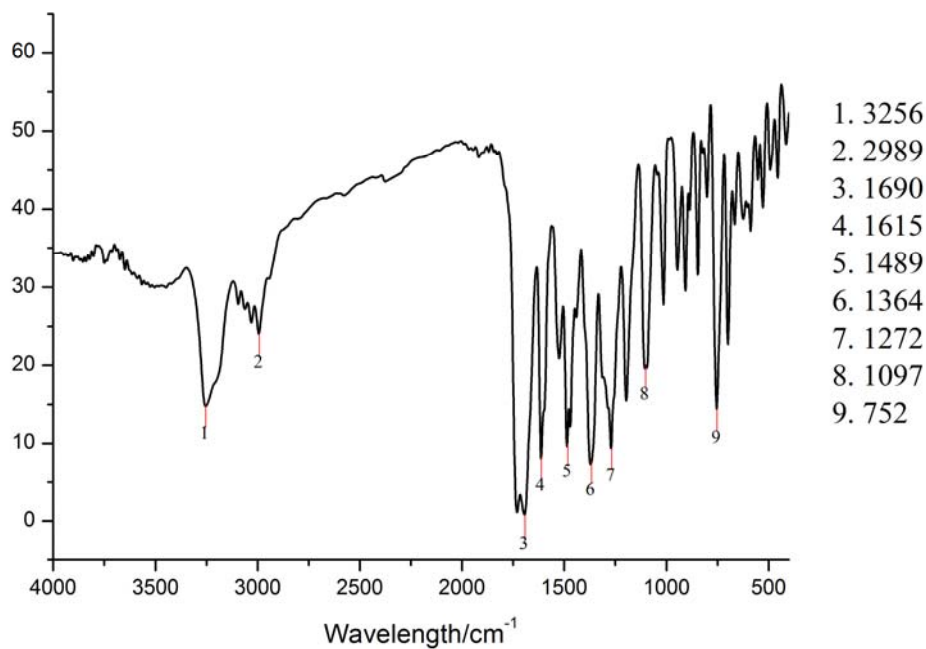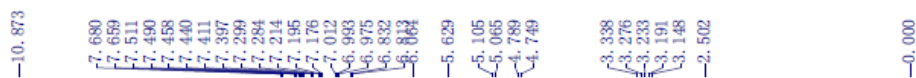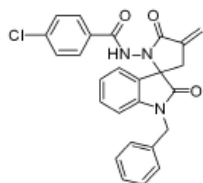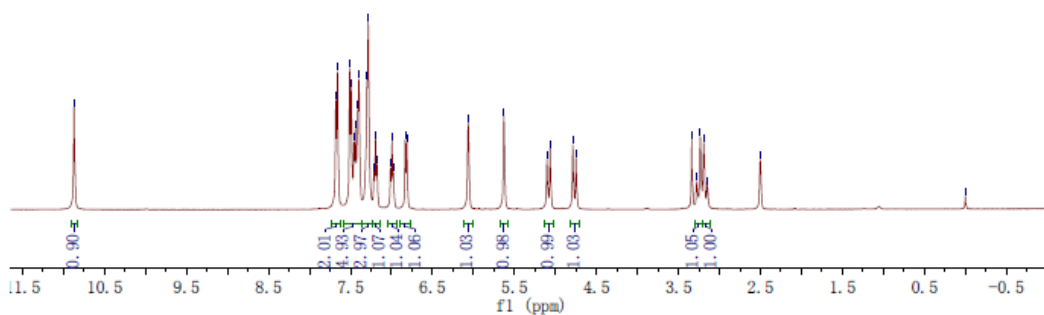

174.56  
 165.14  
 164.65  
 142.88  
 137.10  
 135.82  
 135.59  
 130.13  
 130.10  
 129.57  
 128.60  
 128.44  
 127.53  
 127.28  
 125.68  
 122.60  
 117.46  
 109.34  
 66.28  
 42.97  
 39.94  
 39.80  
 39.66  
 39.52  
 39.38  
 39.24  
 39.10  
 35.21

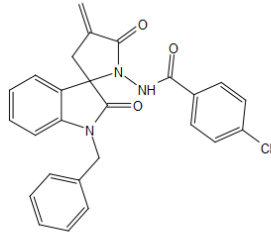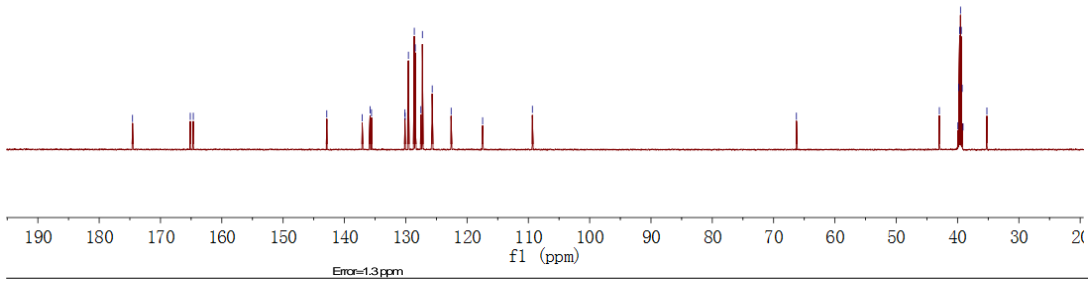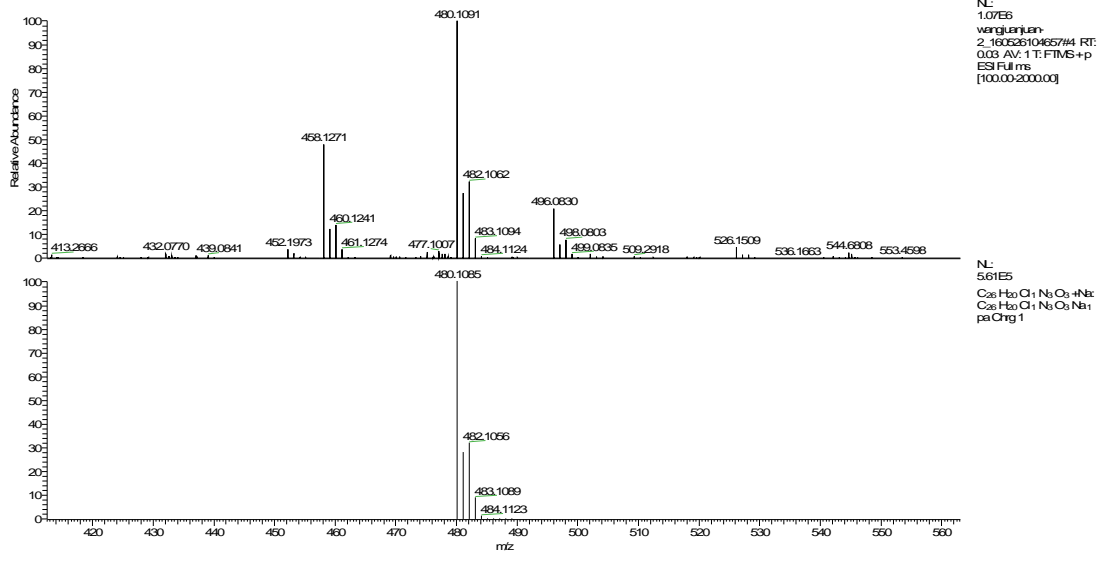



# N-(1-Butyl-4'-methylene-2,5'-dioxospiro[indoline-3,2'-pyrrolidin]-1'-yl) -4-chlorobenzamide(4t)

样品名称:

日期:2016年05月16日

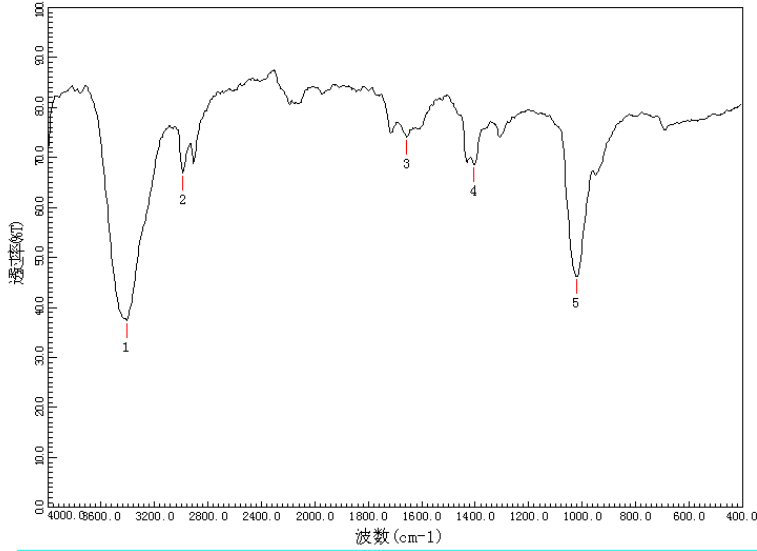

| 序号 | 波数(cm-1) | 峰值   |
|----|----------|------|
| 1  | 3406.0   | 37.4 |
| 2  | 2986.0   | 66.8 |
| 3  | 1686.0   | 74.0 |
| 4  | 1404.0   | 68.6 |
| 5  | 1020.0   | 46.3 |

测试条件: 间隔: 3.0cm<sup>-1</sup> 狭缝: 正常 响应: 正常 温度: 湿度:  
 仪器名称: WGH-30/6型双光束红外分光光度计 生产厂家: 天津市港东科技发展有限公司  
 测试单位: 测试人:

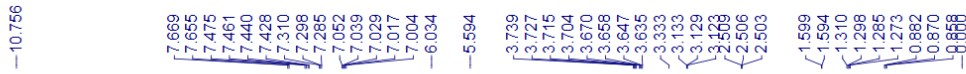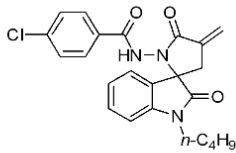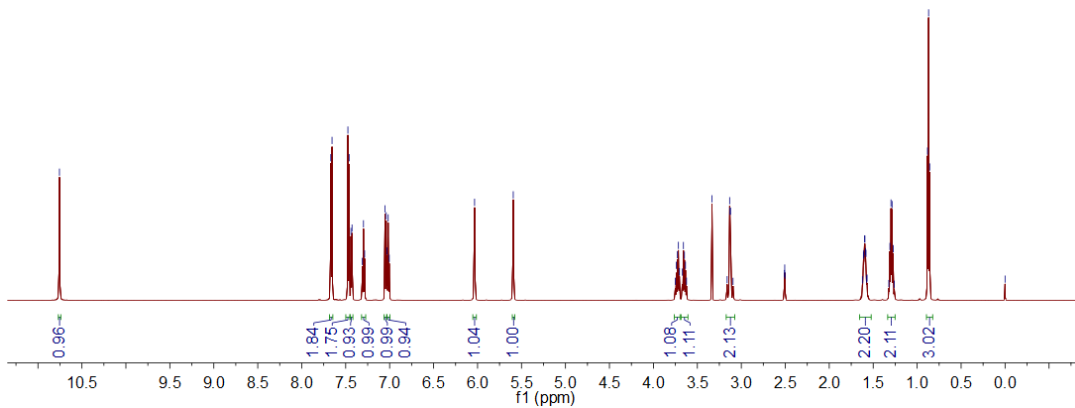

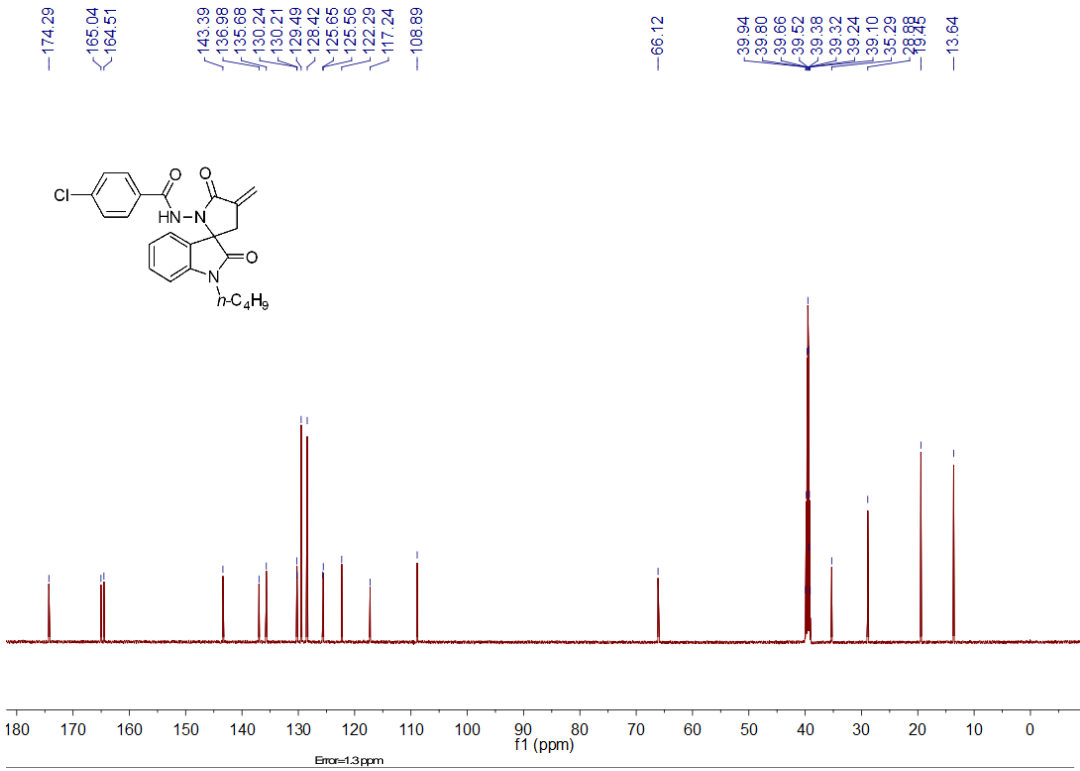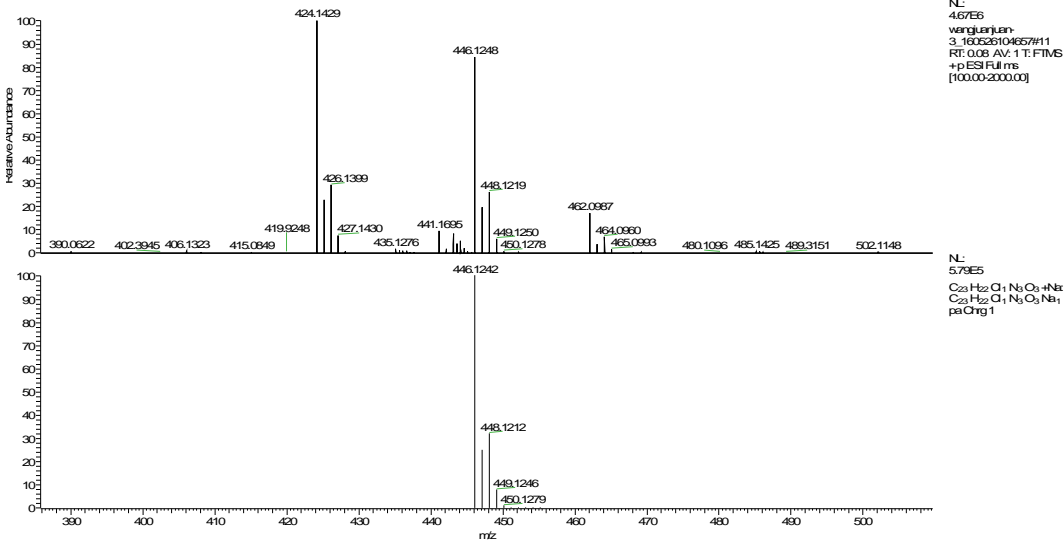

# N-(4'-Methylene-2,5'-dioxospiro[indoline-3,2'-pyrrolidin]-1'-yl)furan -2-carboxamide(4u)

样品名称:

日期:2016年05月16日

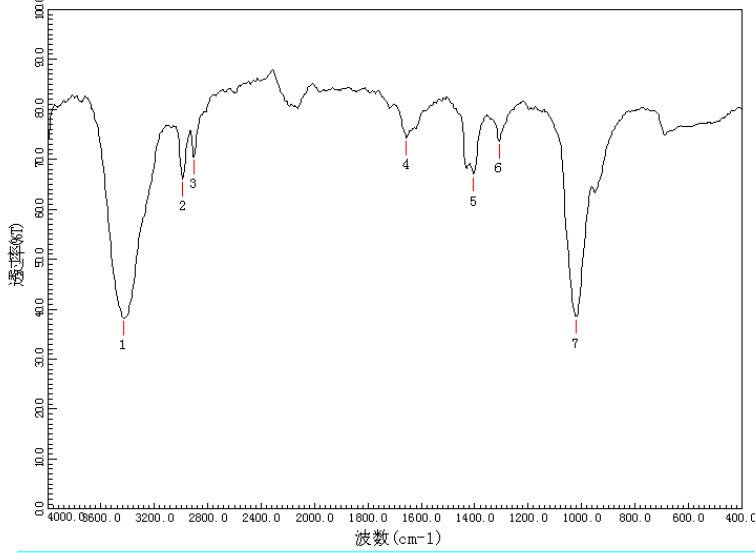

| 序号 | 波数(cm-1) | 峰值   |
|----|----------|------|
| 1  | 3430.0   | 38.2 |
| 2  | 2986.0   | 66.1 |
| 3  | 2902.0   | 70.5 |
| 4  | 1656.0   | 74.3 |
| 5  | 1404.0   | 67.0 |
| 6  | 1308.0   | 73.7 |
| 7  | 1020.0   | 38.6 |

测试条件: 间隔: 3.0cm-1 狭缝: 正常 响应: 正常 温度: 湿度:  
 仪器名称: WGH-30/6型双光束红外分光光度计 生产厂家: 天津市港东科技发展有限公司  
 测试单位: 测试人:

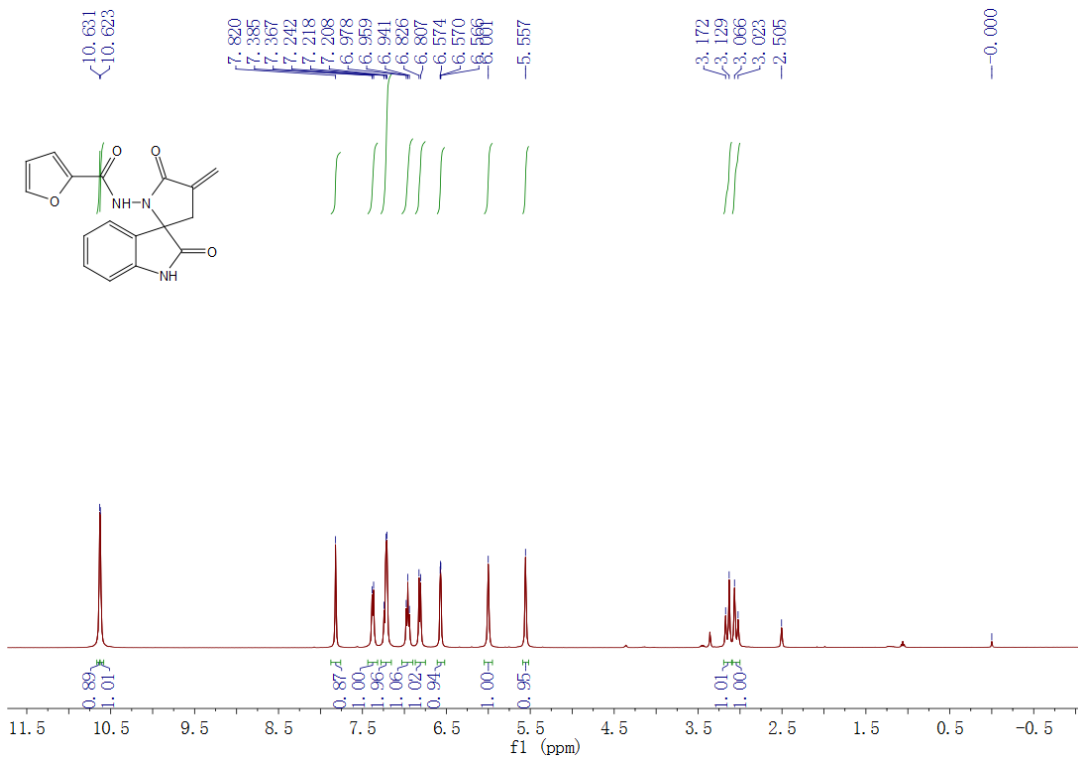

-176.07  
 -165.15  
 -156.81  
 -146.09  
 -145.07  
 -142.54  
 -135.75  
 -130.16  
 -126.29  
 -125.75  
 -121.91  
 -117.12  
 -115.40  
 -111.81  
 -109.83  
 -66.55  
 39.94  
 39.80  
 39.66  
 39.52  
 39.38  
 39.24  
 39.10  
 35.61

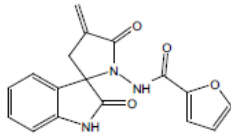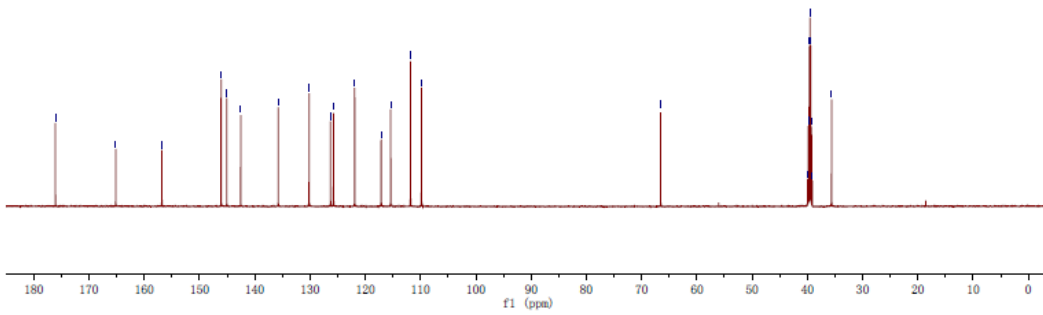

Error=26 ppm

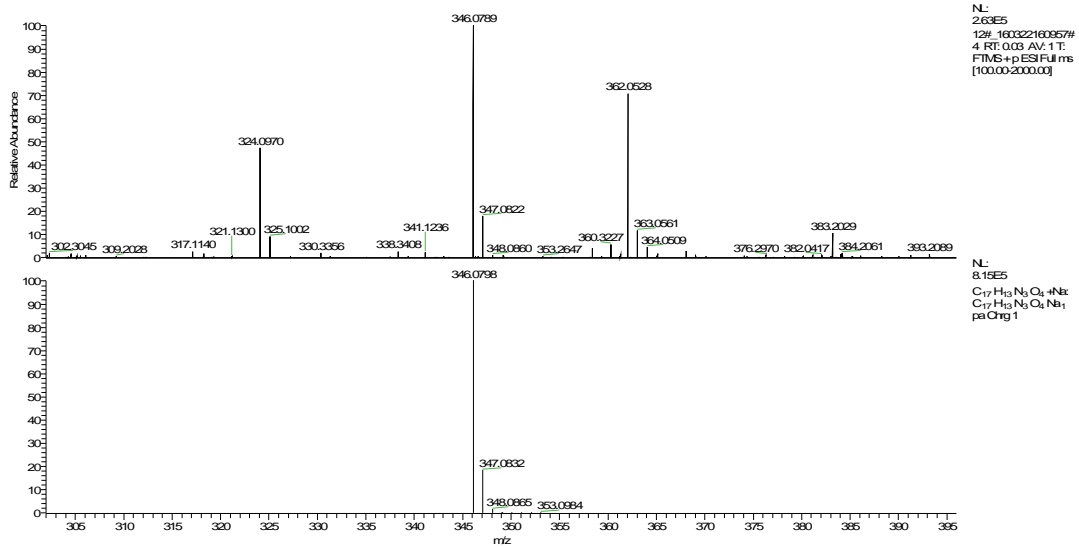

**N-(4'-Methylene-2,5'-dioxospiro[indoline-3,2'-pyrrolidin]-1'-yl)-2-naphthamide (4v)**

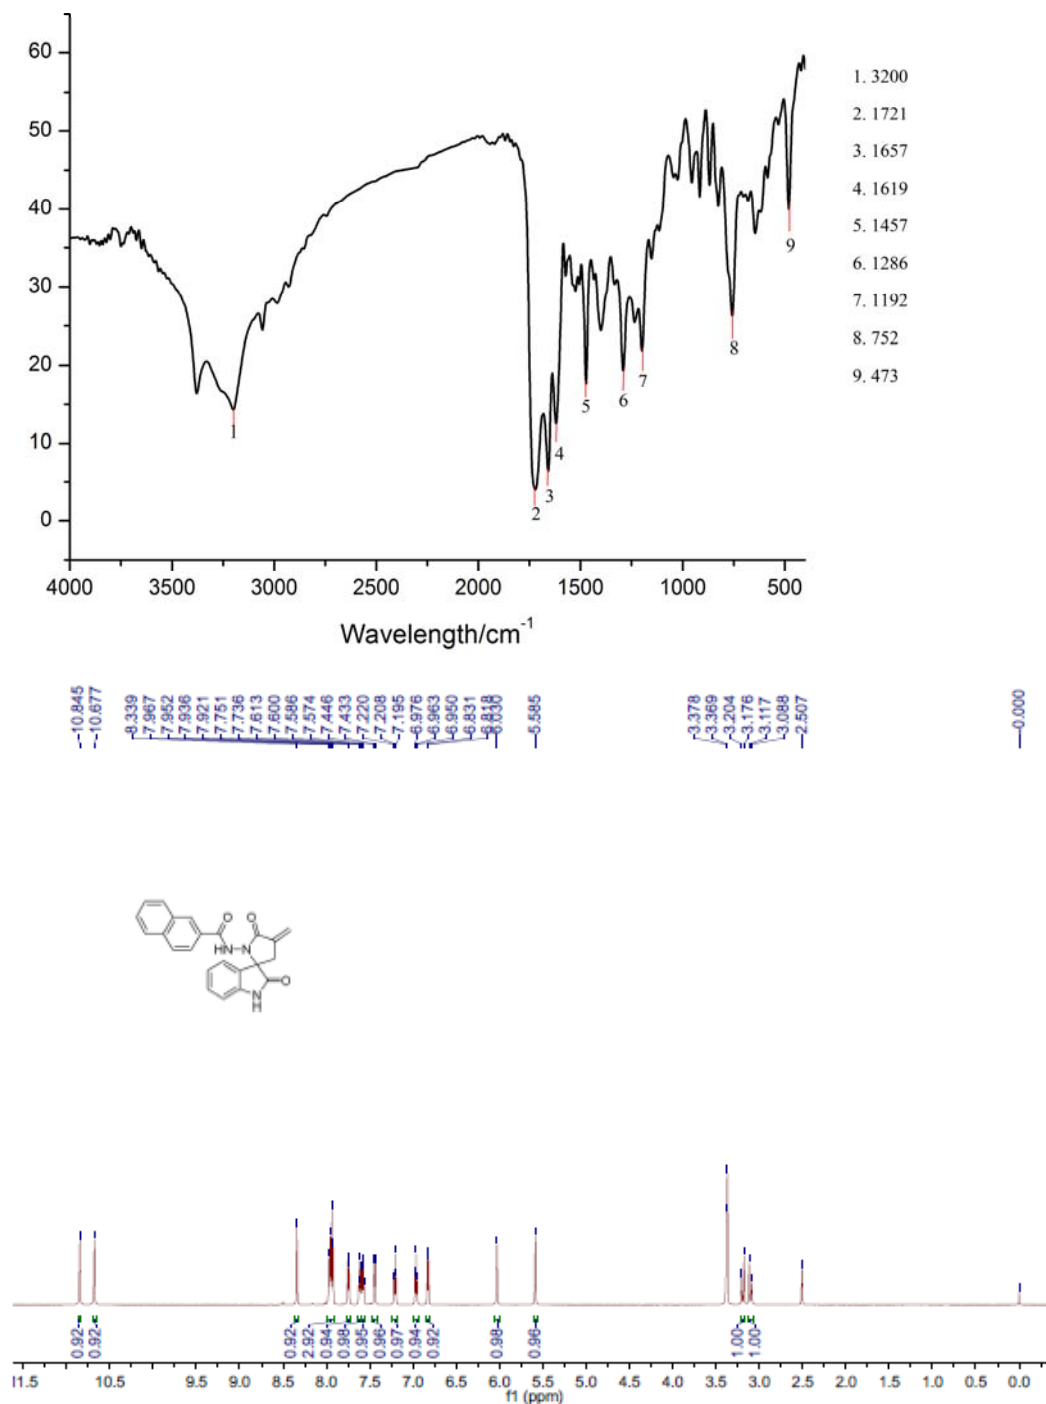

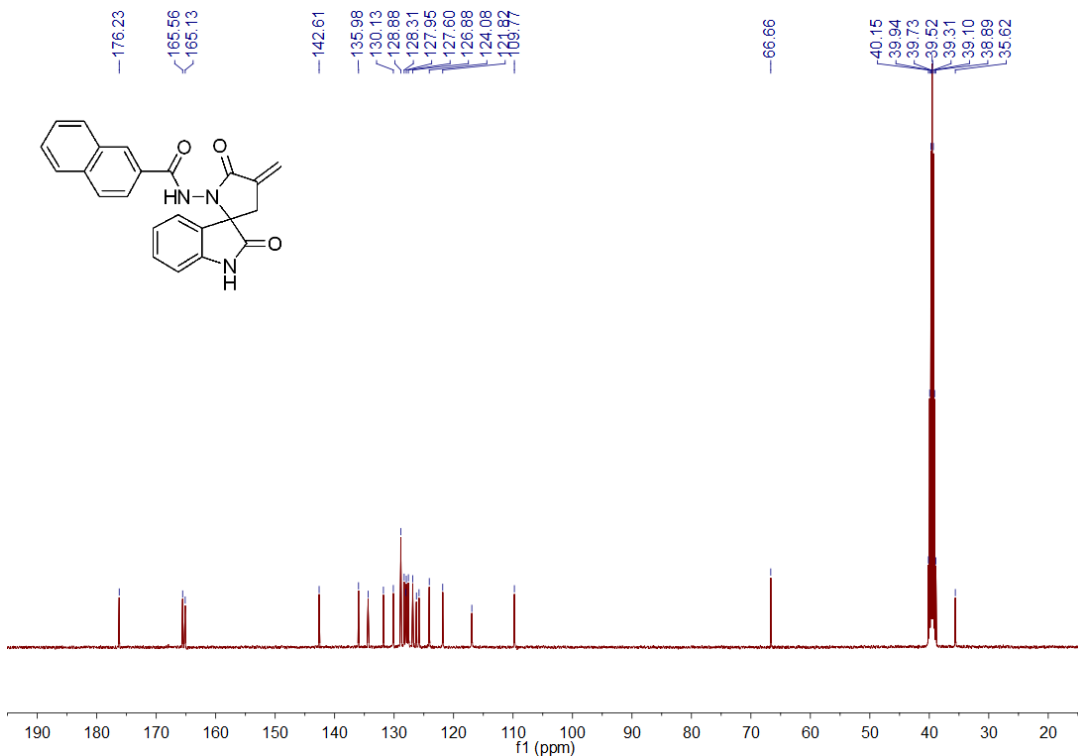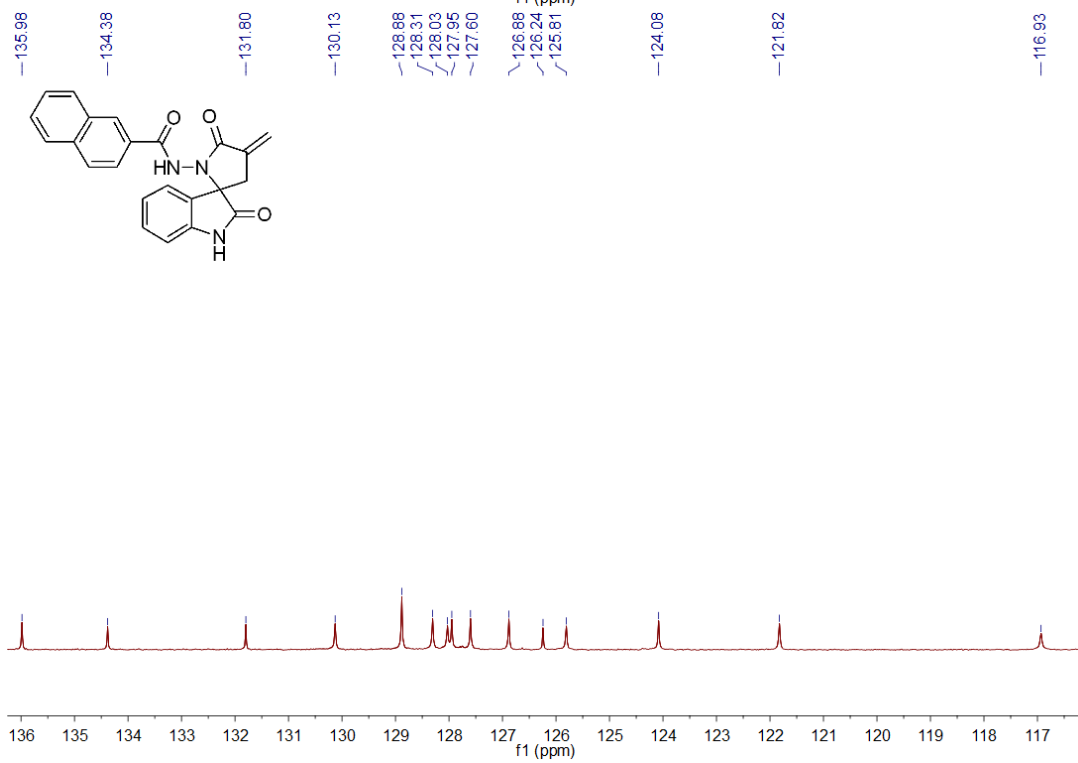

Error=0.7 ppm

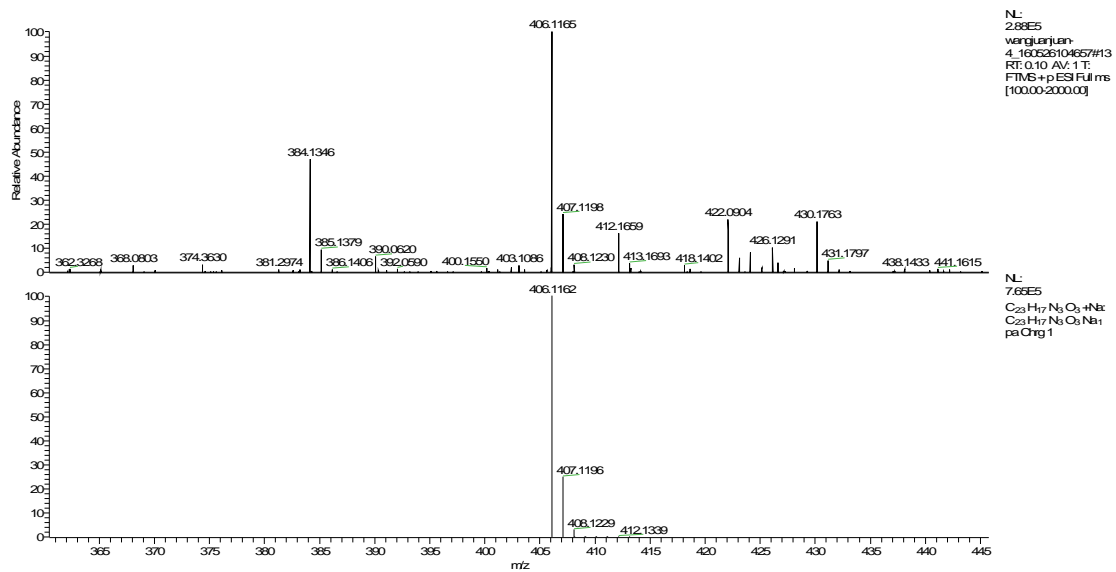

# N-(4'-Methylene-2,5'-dioxospiro[indoline-3,2'-pyrrolidin]-1'-yl)dodecanamide (4w)

样品名称:

日期: 2016年05月16日

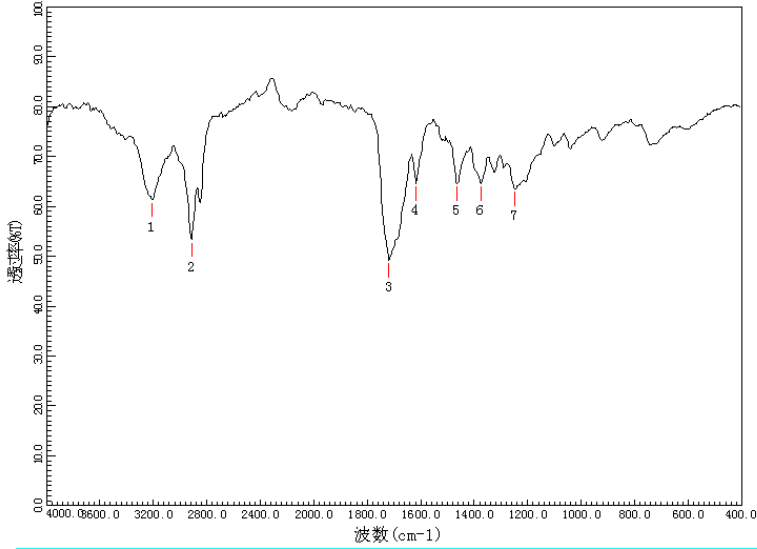

| 序号 | 波数 (cm-1) | 峰值   |
|----|-----------|------|
| 1  | 3208.0    | 61.3 |
| 2  | 2914.0    | 53.3 |
| 3  | 1719.0    | 49.2 |
| 4  | 1617.0    | 64.5 |
| 5  | 1464.0    | 64.6 |
| 6  | 1374.0    | 64.6 |
| 7  | 1248.0    | 63.6 |

测试条件: 间隔: 3.0cm-1 狭缝: 正常 响应: 正常 温度: 湿度:  
 仪器名称: WGH-30/6型双光束红外分光光度计 生产厂家: 天津市港东科技发展有限公司  
 测试单位: 测试人:

8.350  
7.8947  
7.7513  
7.7501  
7.271  
7.265  
7.262  
7.239  
7.067  
7.055  
7.042  
6.907  
6.894  
6.164  
5.494  
3.098  
2.075  
2.063  
2.051  
2.039  
2.025  
2.012  
2.000  
1.988  
1.356  
1.344  
1.332  
1.320  
1.306  
1.297  
1.286  
1.275  
1.263  
1.227  
1.205  
1.193  
1.182  
1.172  
1.136  
1.125  
1.111  
1.100  
1.085  
1.073  
1.065  
1.051  
1.004  
0.995  
0.981  
0.970  
0.941  
0.929  
0.918  
0.905  
0.886  
0.875  
0.862  
0.000

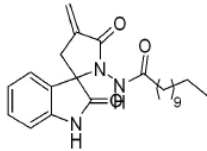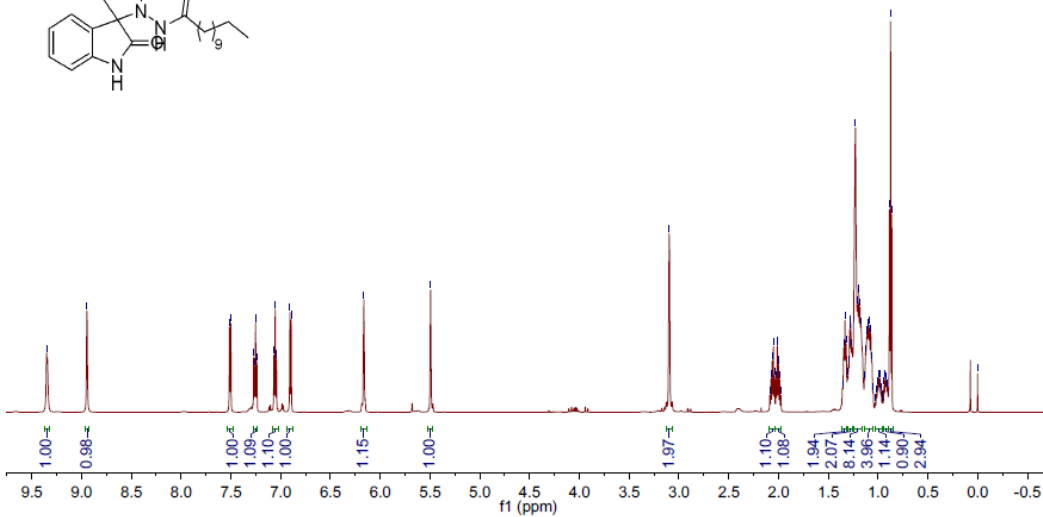



177.90  
172.43  
167.18

141.50  
134.57  
130.49  
126.18  
125.74  
123.35  
118.63  
110.60

77.21  
77.00  
76.79  
67.71

35.20  
33.83  
31.86  
29.62  
29.60  
29.37  
29.30  
29.27  
28.60  
25.26  
22.63  
14.06

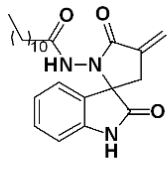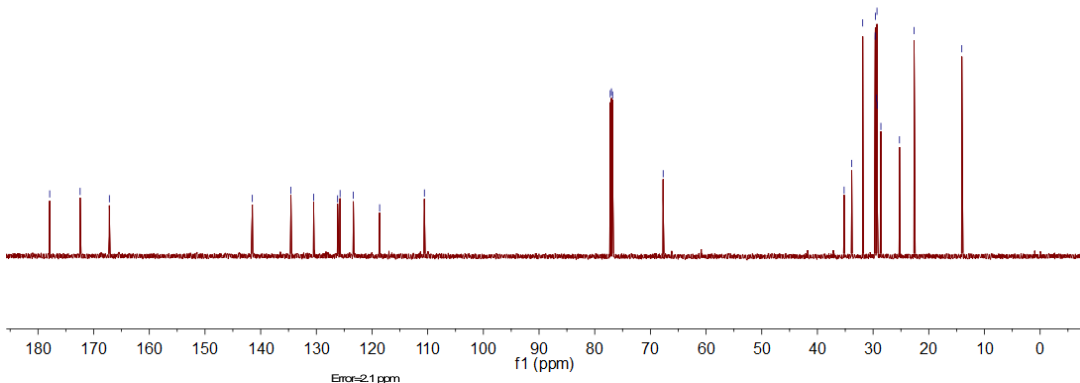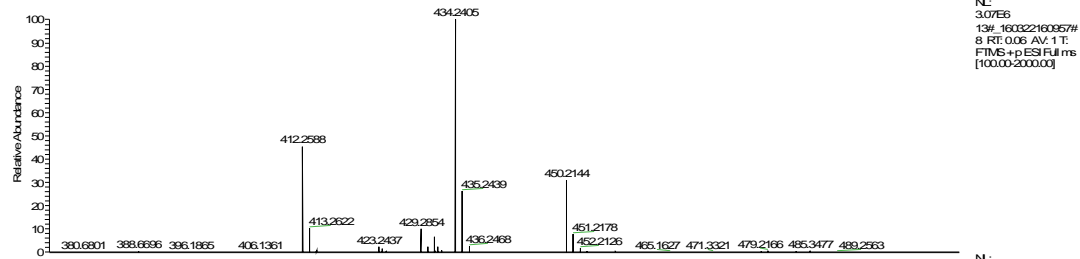

NL:  
3.07E6  
13#\_160322160357#  
8 RT: 0.08 AV: 1.1  
FTMS+p.ES.FULL.ms  
[100.00:2000.00]

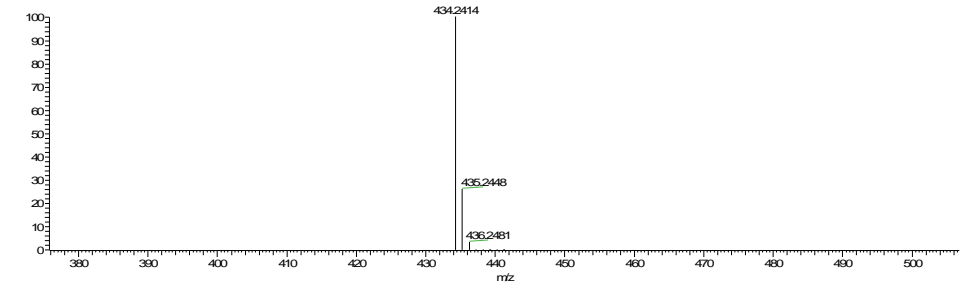

NL:  
7.56E5  
C24 H28 N2 O2 +N2  
C24 H28 N2 O2 Na1  
pe Chrg 1

# N-(4'-Methylene-2,5'-dioxospiro[indoline-3,2'-pyrrolidin]-1'-yl)stearamide (4x)

样品名称:

日期: 2016年05月16日

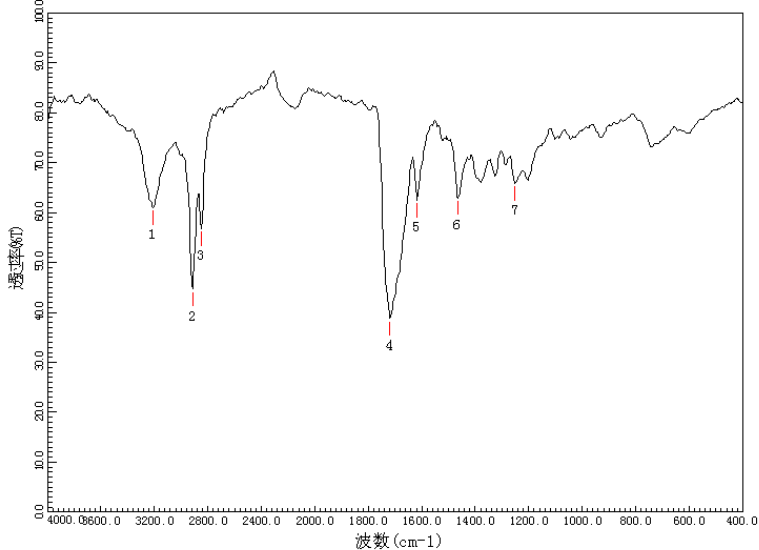

| 序号 | 波数 (cm-1) | 峰值   |
|----|-----------|------|
| 1  | 3208.0    | 61.0 |
| 2  | 2914.0    | 44.7 |
| 3  | 2848.0    | 56.8 |
| 4  | 1719.0    | 38.8 |
| 5  | 1617.0    | 62.5 |
| 6  | 1464.0    | 63.0 |
| 7  | 1251.0    | 65.9 |

测试条件: 间隔: 3.0cm-1 狭缝: 正常 响应: 正常 温度: 湿度:  
 仪器名称: WGH-30/6型双光束红外分光光度计 生产厂家: 天津市港东科技发展有限公司  
 测试单位: 测试人:

9.311 8.926 8.912 7.513 7.501 7.268 7.253 7.240 7.068 7.056 7.043 6.906 6.893 6.168 5.494 3.097 2.075 2.063 2.051 2.039 2.011 1.999 1.987 1.296 1.284 1.255 1.181 1.088 0.889 0.878 0.866

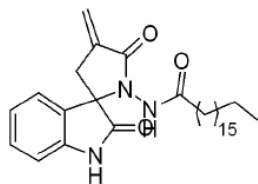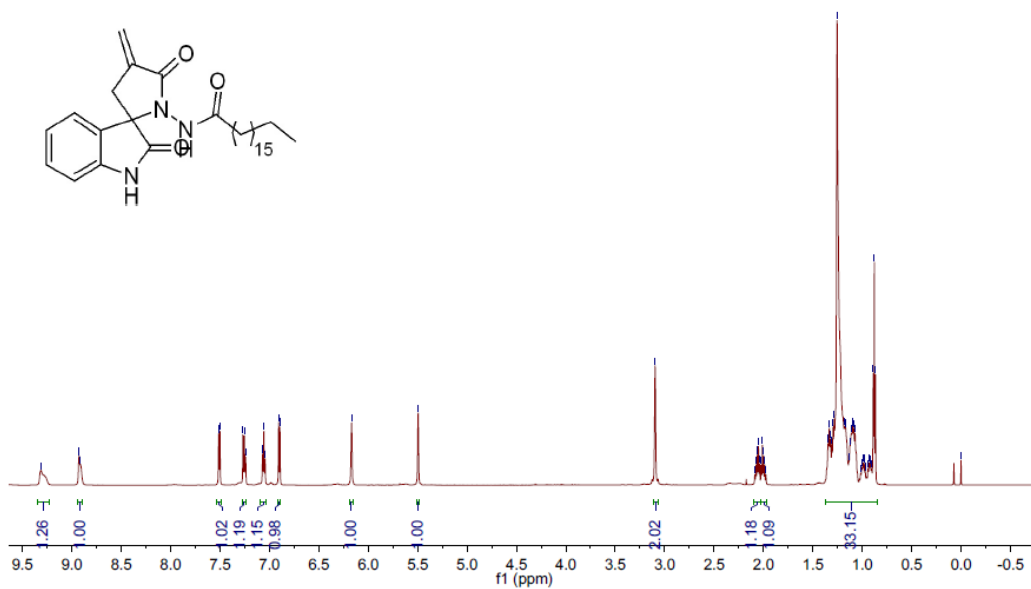

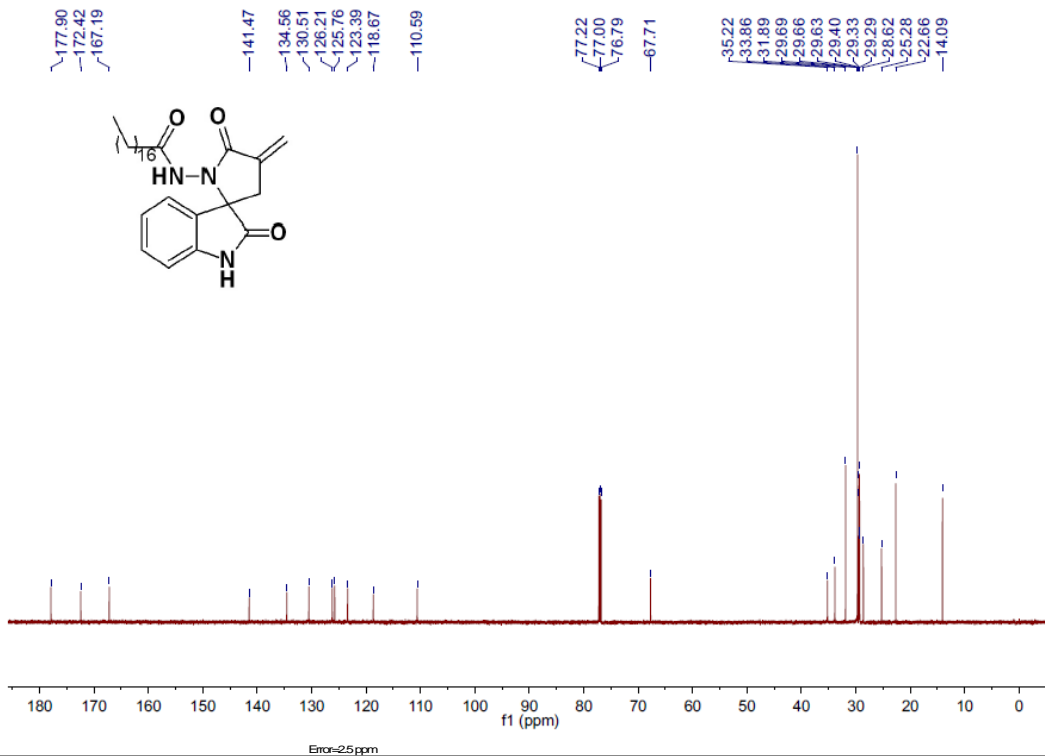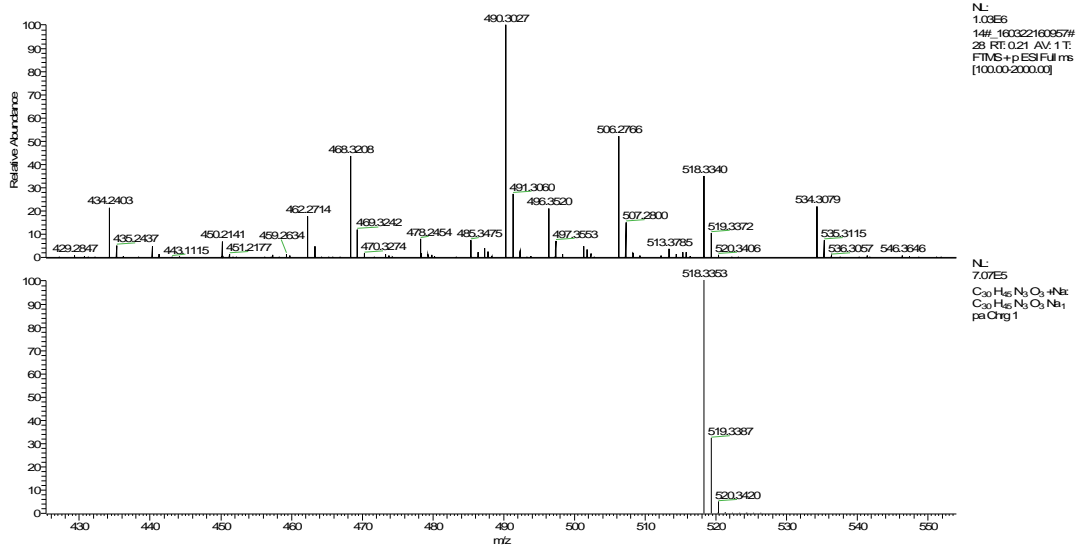

# Ethyl 2-((2-oxo-3-(phenylamino)indolin-3-yl)methyl)acrylate(6a)

样品名称:

日期:2016年05月16日

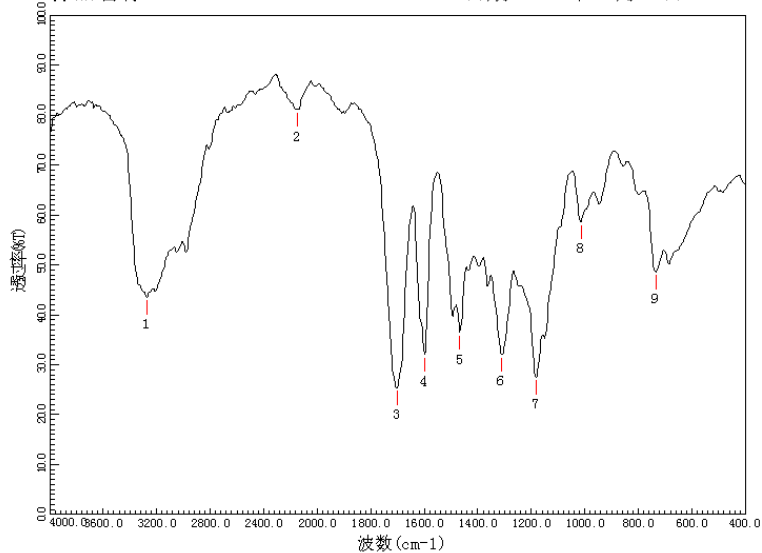

| 序号 | 波数 (cm⁻¹) | 峰值   |
|----|-----------|------|
| 1  | 3274.0    | 43.6 |
| 2  | 2152.0    | 81.1 |
| 3  | 1701.0    | 25.4 |
| 4  | 1599.0    | 32.0 |
| 5  | 1467.0    | 36.5 |
| 6  | 1311.0    | 32.1 |
| 7  | 1182.0    | 27.5 |
| 8  | 1014.0    | 58.6 |
| 9  | 735.0     | 48.6 |

测试条件: 间隔: 3.0cm⁻¹ 狭缝: 正常 响应: 正常 温度: 湿度:  
 仪器名称: WGH-30/6型双光束红外分光光度计 生产厂家: 天津市港东科技发展有限公司  
 测试单位: 测试人:

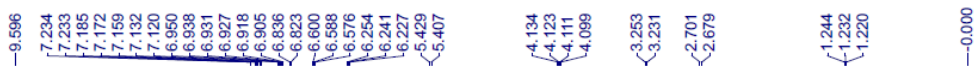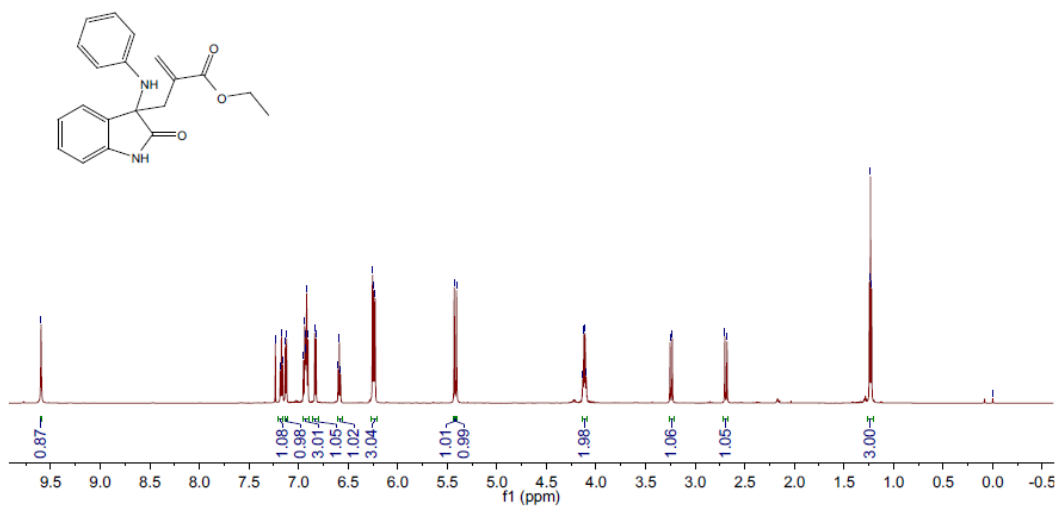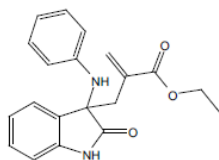

-180.51  
 -167.54  
 145.15  
 139.69  
 133.93  
 130.36  
 128.94  
 128.87  
 128.86  
 124.85  
 122.24  
 118.40  
 114.20  
 110.84  
 77.21  
 77.00  
 76.79  
 65.17  
 61.15  
 41.01  
 14.00

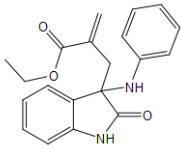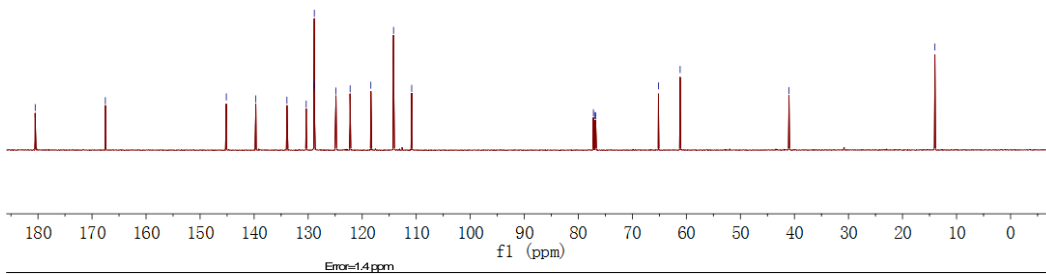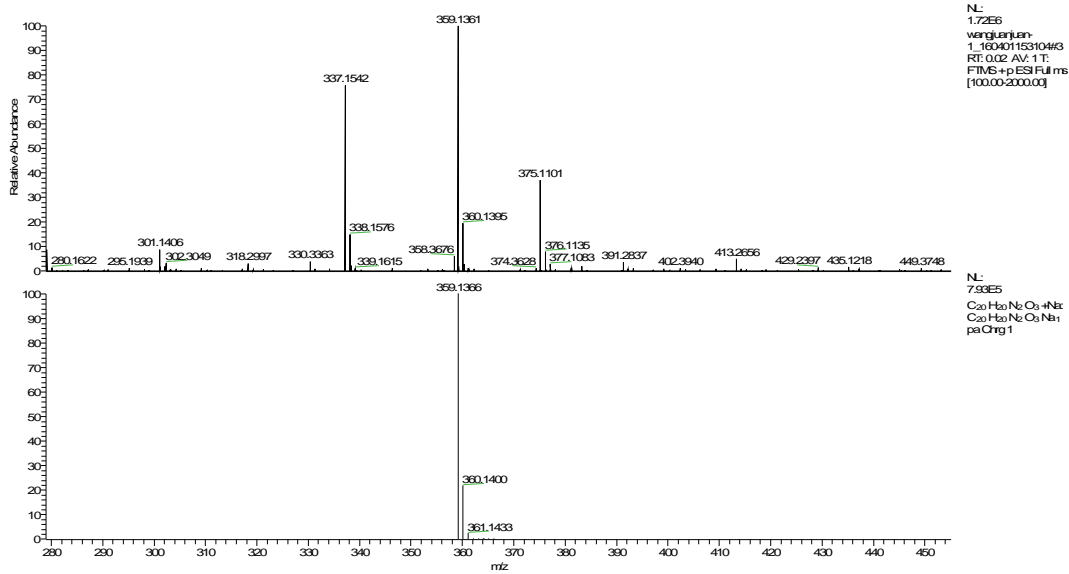

# Ethyl 2-((2-oxo-3-(phenylamino)indolin-3-yl)methyl)acrylate(6b)

样品名称:

日期:2016年05月16日

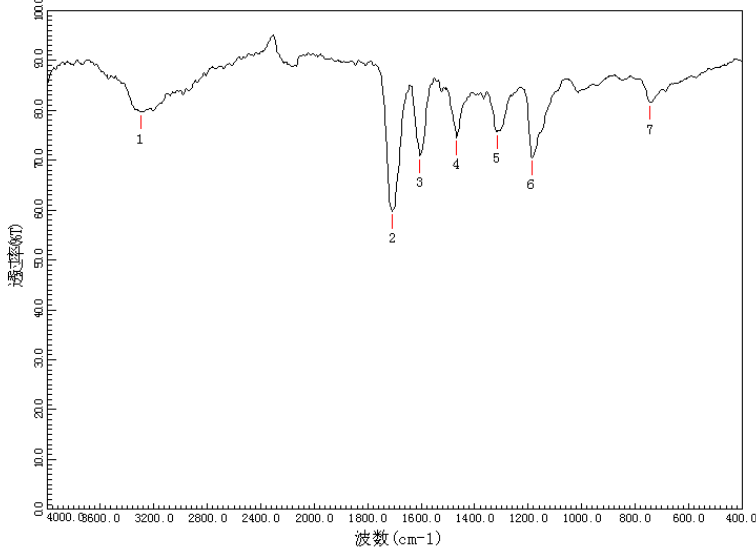

| 序号 | 波数(cm-1) | 峰值   |
|----|----------|------|
| 1  | 3298.0   | 79.7 |
| 2  | 1707.0   | 59.7 |
| 3  | 1605.0   | 70.8 |
| 4  | 1467.0   | 74.4 |
| 5  | 1317.0   | 75.7 |
| 6  | 1185.0   | 70.5 |
| 7  | 744.0    | 81.6 |

测试条件: 间隔: 3.0cm-1 狭缝: 正常 响应: 正常 温度: 湿度:  
 仪器名称: WGH-30/6型双光束红外分光光度计 生产厂家: 天津市港东科技发展有限公司  
 测试单位: 测试人:

9.437 7.238 7.200 7.187 7.175 7.053 7.041 6.987 6.975 6.934 6.922 6.909 6.865 6.853 6.674 6.662 6.649 6.537 6.524 6.512 6.329 5.697 5.683 5.397 5.171 4.200 4.190 4.179 3.305 3.282 2.621 2.598 2.260 1.290 1.279 1.267 -0.000

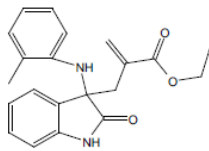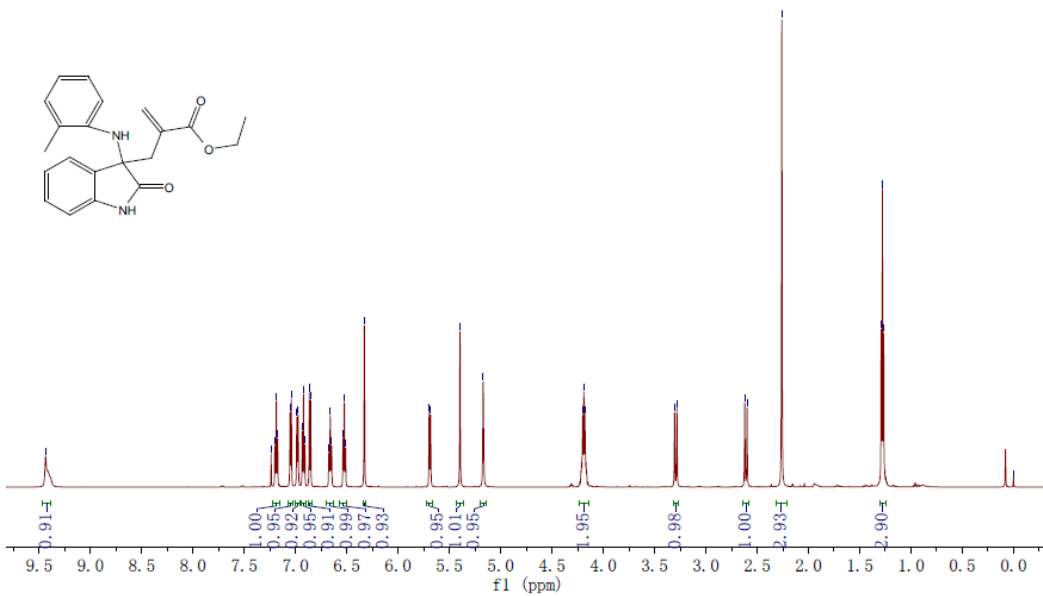

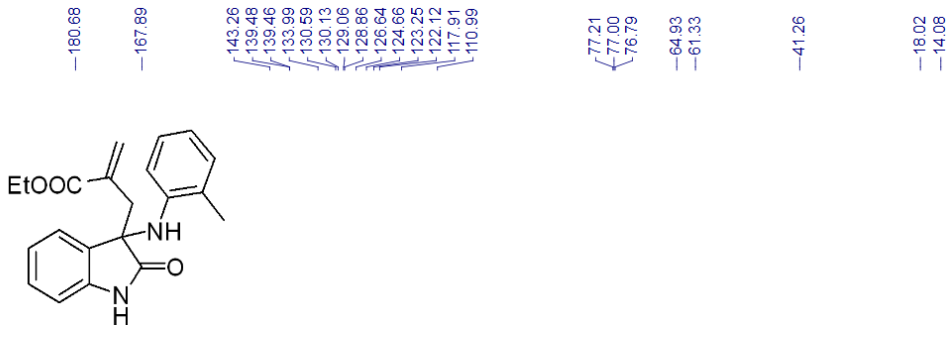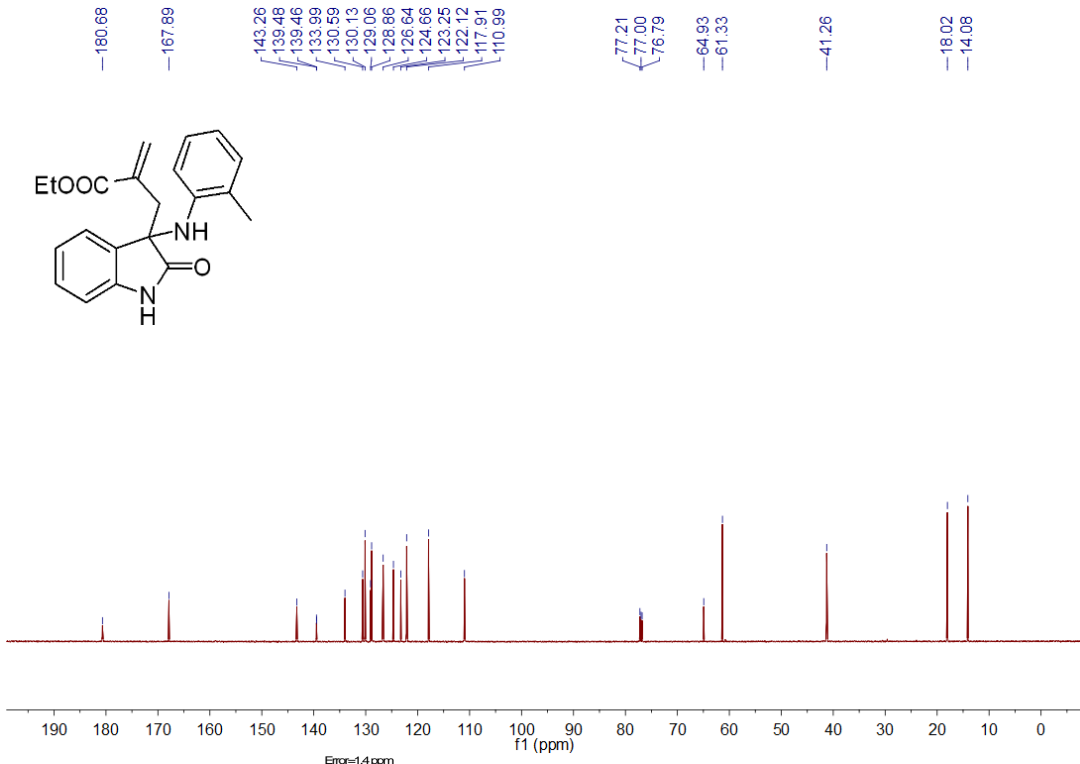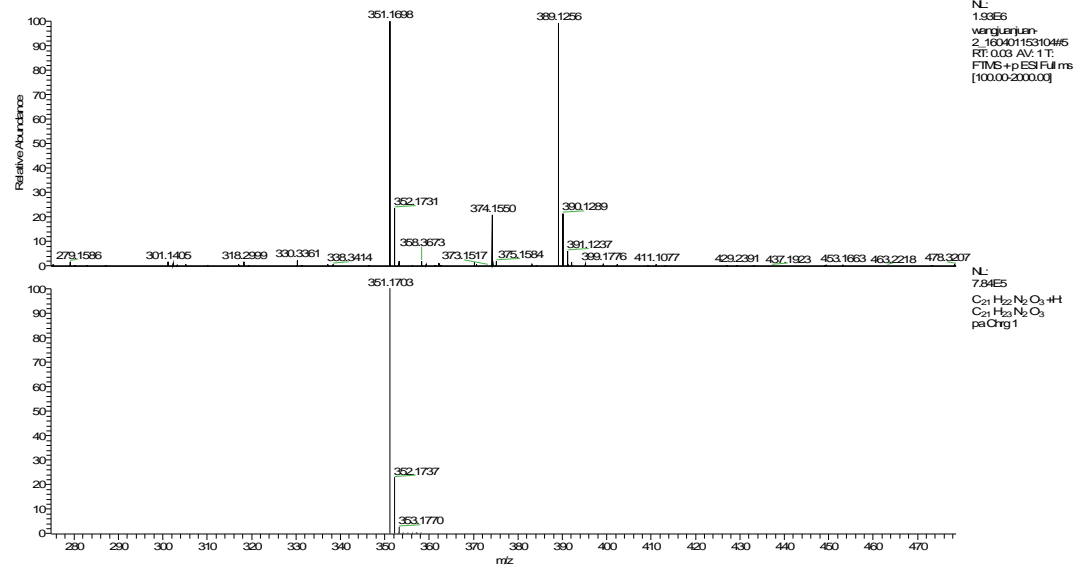

# Ethyl 2-((2-oxo-3-(m-tolylamino)indolin-3-yl)methyl)acrylate(6c)

样品名称:

日期:2016年05月16日

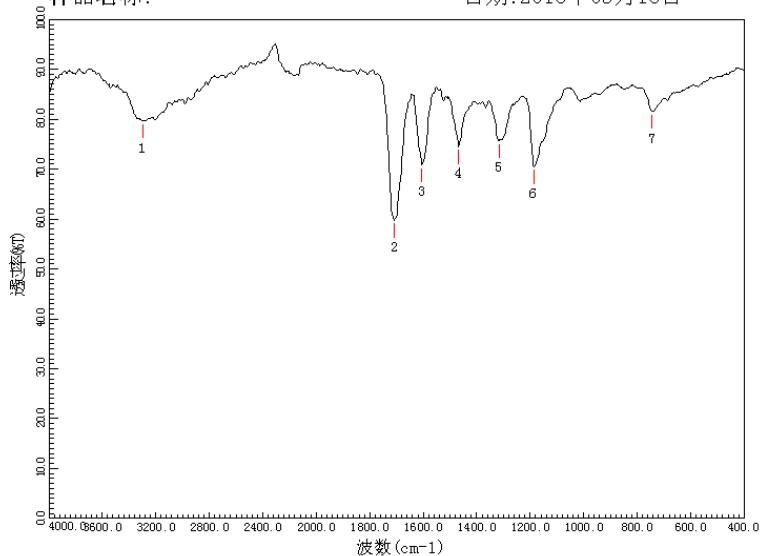

| 序号 | 波数(cm-1) | 峰值   |
|----|----------|------|
| 1  | 3298.0   | 79.7 |
| 2  | 1707.0   | 59.7 |
| 3  | 1605.0   | 70.8 |
| 4  | 1467.0   | 74.4 |
| 5  | 1317.0   | 75.7 |
| 6  | 1185.0   | 70.5 |
| 7  | 744.0    | 81.6 |

测试条件: 间隔: 3.0cm-1 狭缝: 正常 响应: 正常 温度: 湿度:  
 仪器名称: WGH-30/6型双光束红外分光光度计 生产厂家: 天津市港东科技发展有限公司  
 测试单位: 测试人:

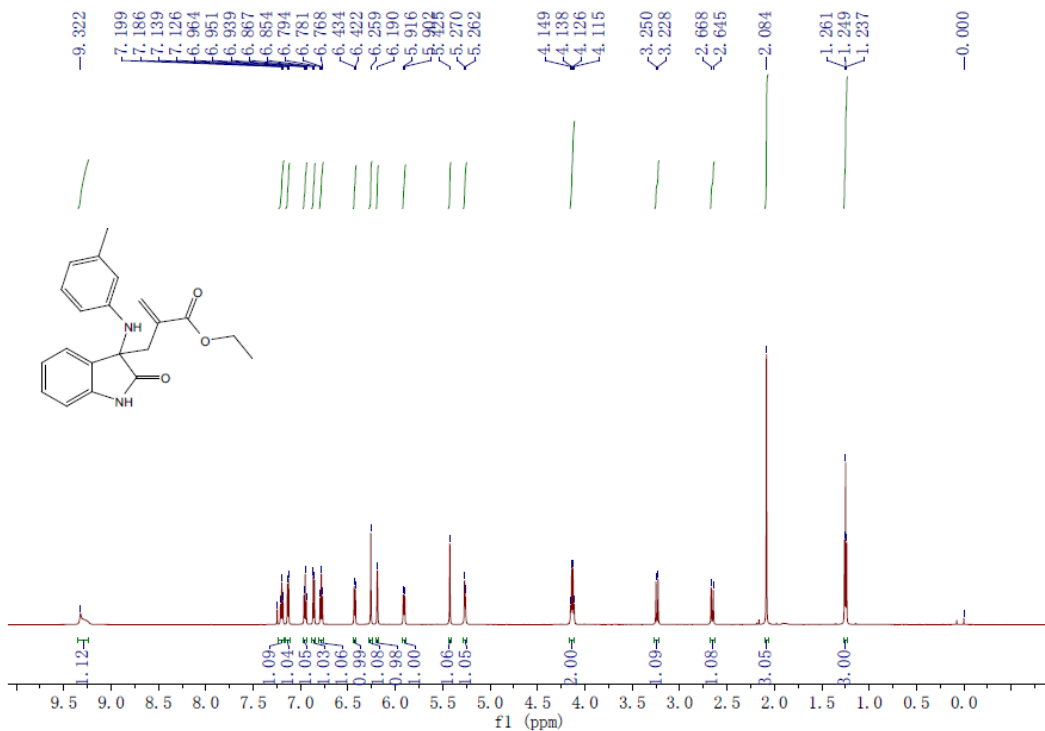



-180.37  
 -167.61  
 145.14  
 139.65  
 138.55  
 134.04  
 130.35  
 129.08  
 128.96  
 128.82  
 125.02  
 122.29  
 119.53  
 115.69  
 110.77  
 110.69  
 77.21  
 77.00  
 76.79  
 -65.14  
 -61.21  
 -41.11  
 -21.40  
 -14.07

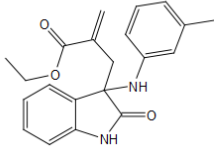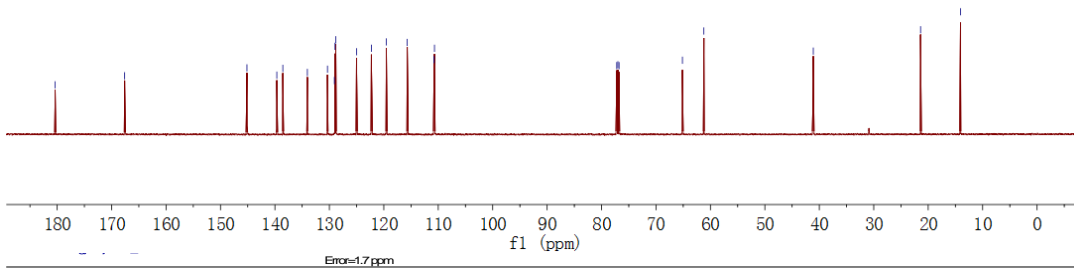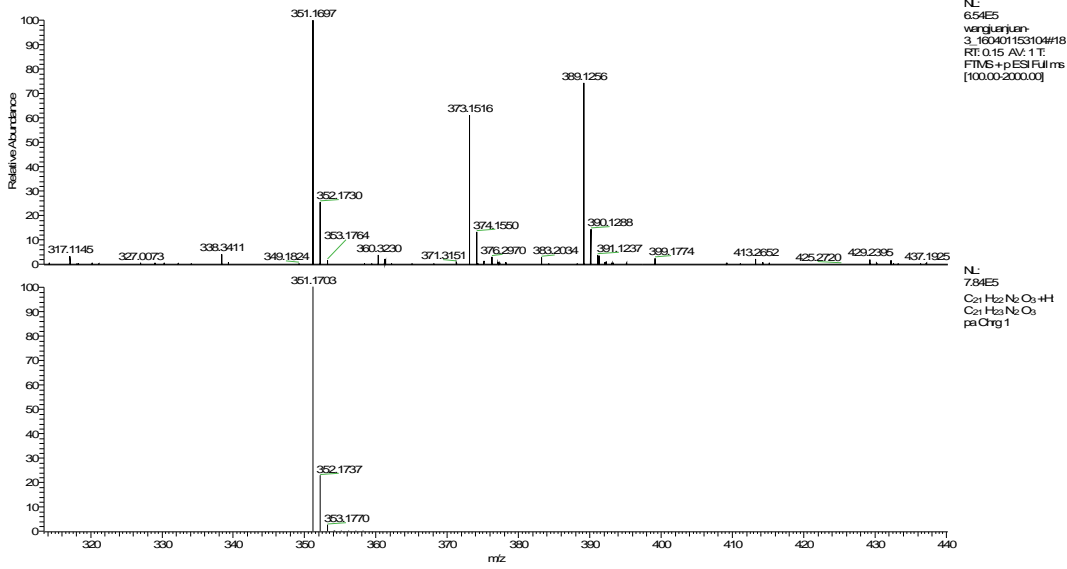

# Ethyl 2-((2-oxo-3-(p-tolylamino)indolin-3-yl)methyl)acrylate(6d)

样品名称:

日期:2016年05月16日

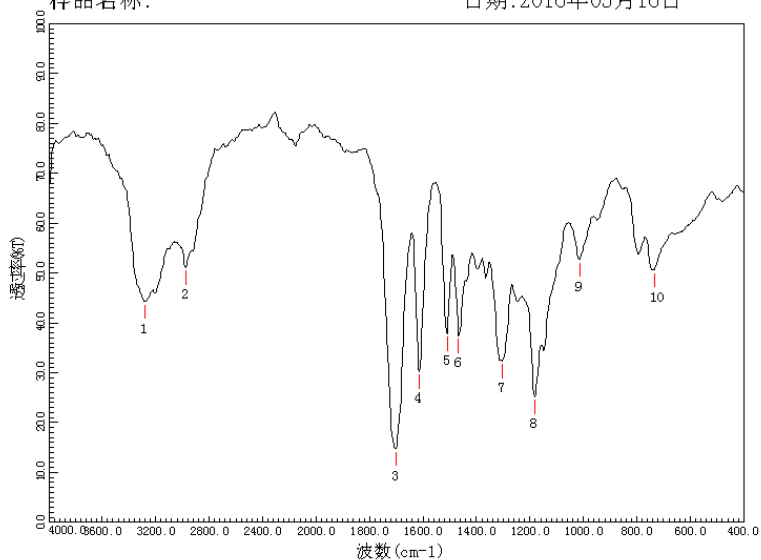

| 序号 | 波数 (cm <sup>-1</sup> ) | 峰值   |
|----|------------------------|------|
| 1  | 3280.0                 | 44.3 |
| 2  | 2974.0                 | 51.1 |
| 3  | 1701.0                 | 14.8 |
| 4  | 1614.0                 | 30.2 |
| 5  | 1509.0                 | 37.8 |
| 6  | 1467.0                 | 37.4 |
| 7  | 1305.0                 | 32.4 |
| 8  | 1182.0                 | 25.2 |
| 9  | 1014.0                 | 52.7 |
| 10 | 735.0                  | 50.6 |

测试条件: 间隔: 3.0cm<sup>-1</sup> 狭缝: 正常 响应: 正常 温度: 湿度:  
 仪器名称: WGH-30/6型双光束红外分光光度计 生产厂家: 天津市港东科技发展有限公司  
 测试单位: 测试人:

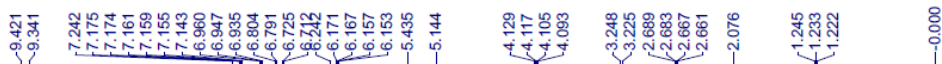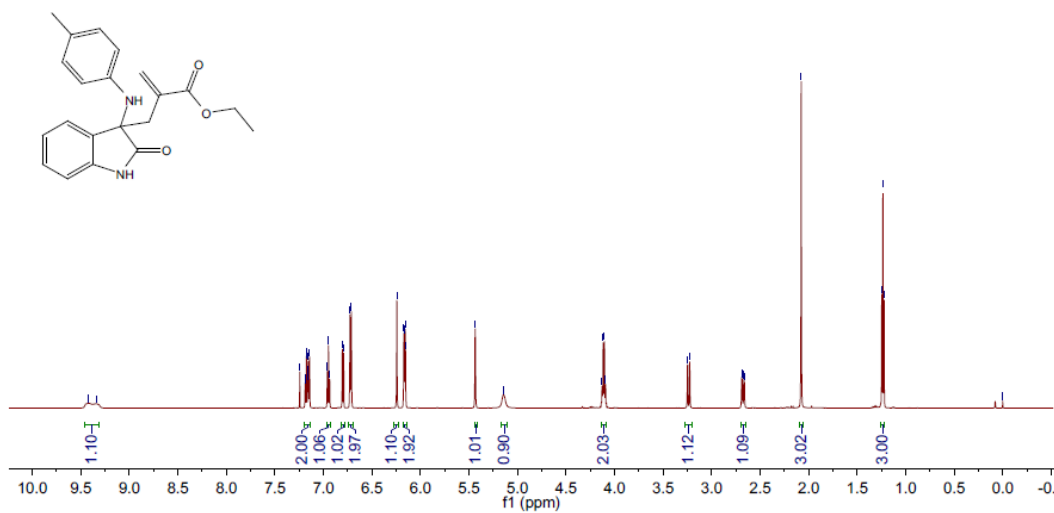

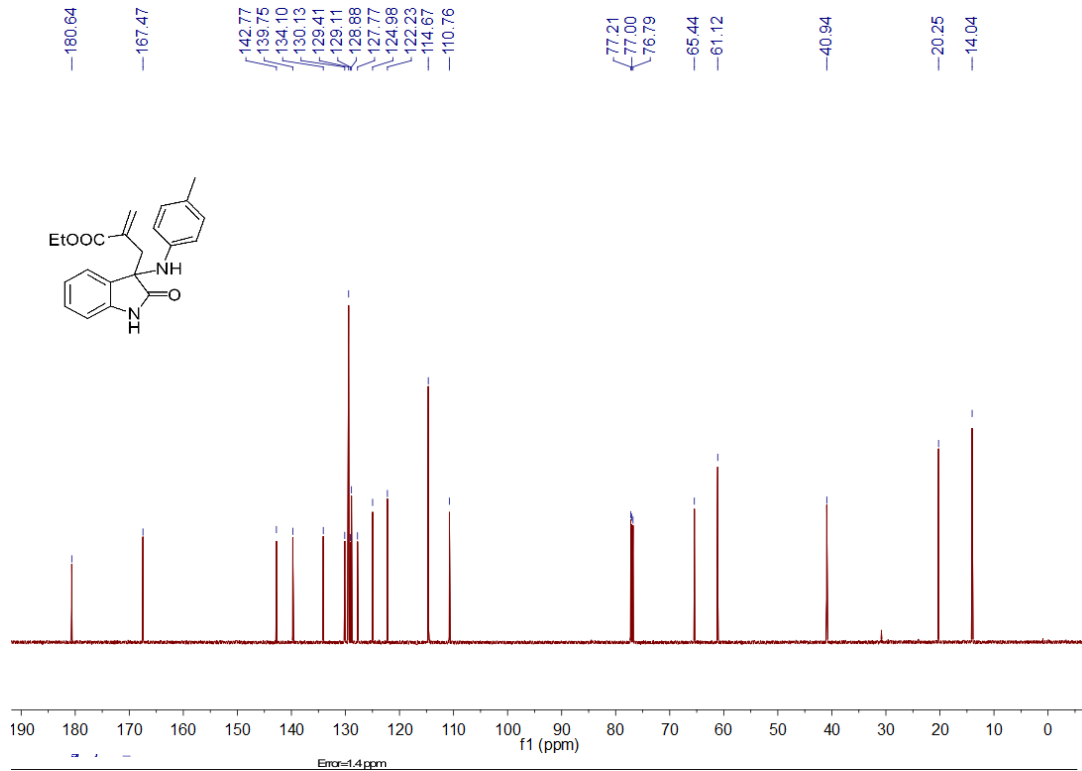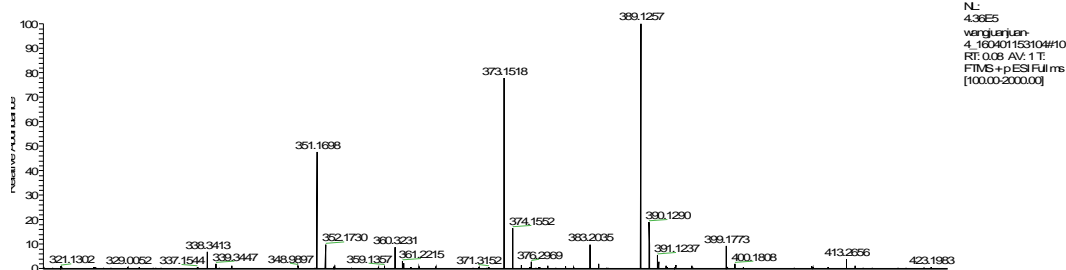

NL:  
4.36E5  
wangjun  
4\_160401153104#10  
RE:008 AV:1 T:  
FIMS+pESI Fullms  
[100.00-2000.00]

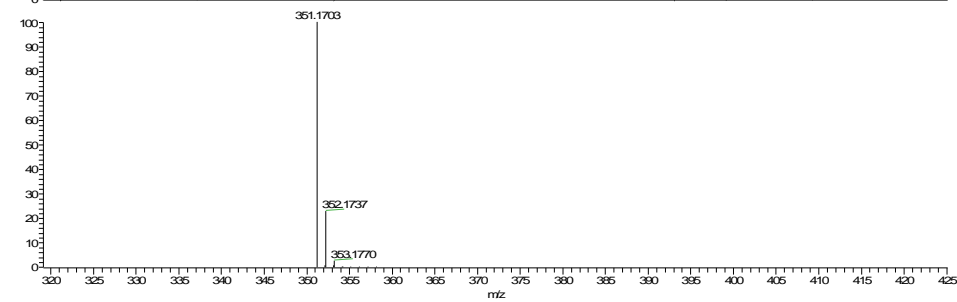

NL:  
7.84E5  
C<sub>21</sub>H<sub>22</sub>N<sub>2</sub>O<sub>3</sub>+H  
C<sub>21</sub>H<sub>23</sub>N<sub>2</sub>O<sub>3</sub>  
ps Chrg 1

# Ethyl 2-((3-((4-methoxyphenyl)amino)-2-oxindolin-3-yl)methyl)acrylate(6e)

样品名称:

日期:2016年05月16日

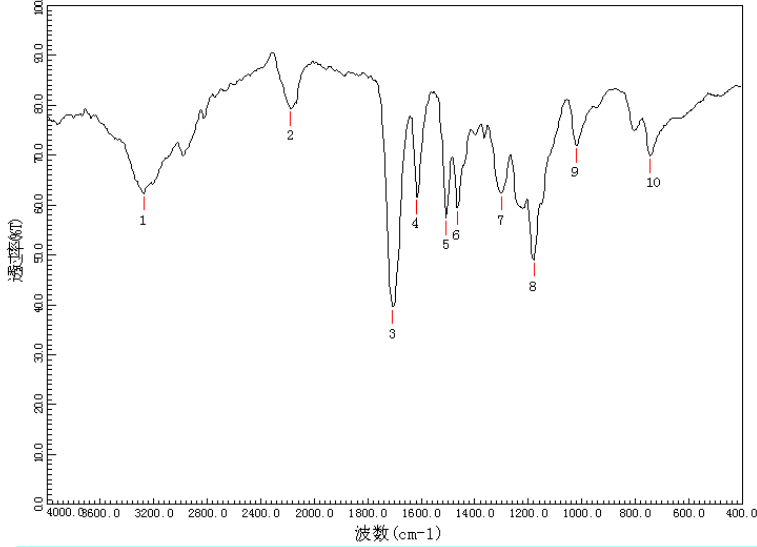

| 序号 | 波数 (cm-1) | 峰值   |
|----|-----------|------|
| 1  | 3274.0    | 62.3 |
| 2  | 2176.0    | 79.3 |
| 3  | 1707.0    | 39.6 |
| 4  | 1617.0    | 61.6 |
| 5  | 1506.0    | 57.4 |
| 6  | 1464.0    | 59.4 |
| 7  | 1299.0    | 62.4 |
| 8  | 1179.0    | 49.1 |
| 9  | 1020.0    | 72.0 |
| 10 | 744.0     | 69.9 |

测试条件: 间隔: 3.0cm-1 狭缝: 正常 响应: 正常 温度: 湿度:  
 仪器名称: WGH-30/6型双光束红外分光光度计 生产厂家: 天津市港东科技发展有限公司  
 测试单位: 测试人:

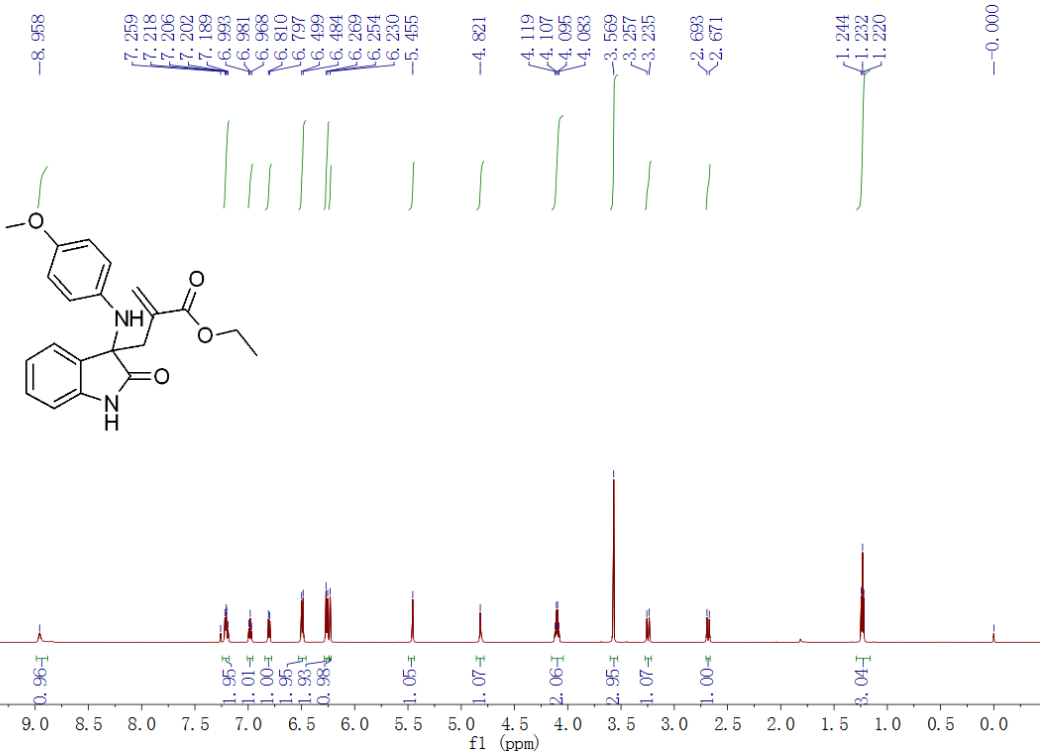

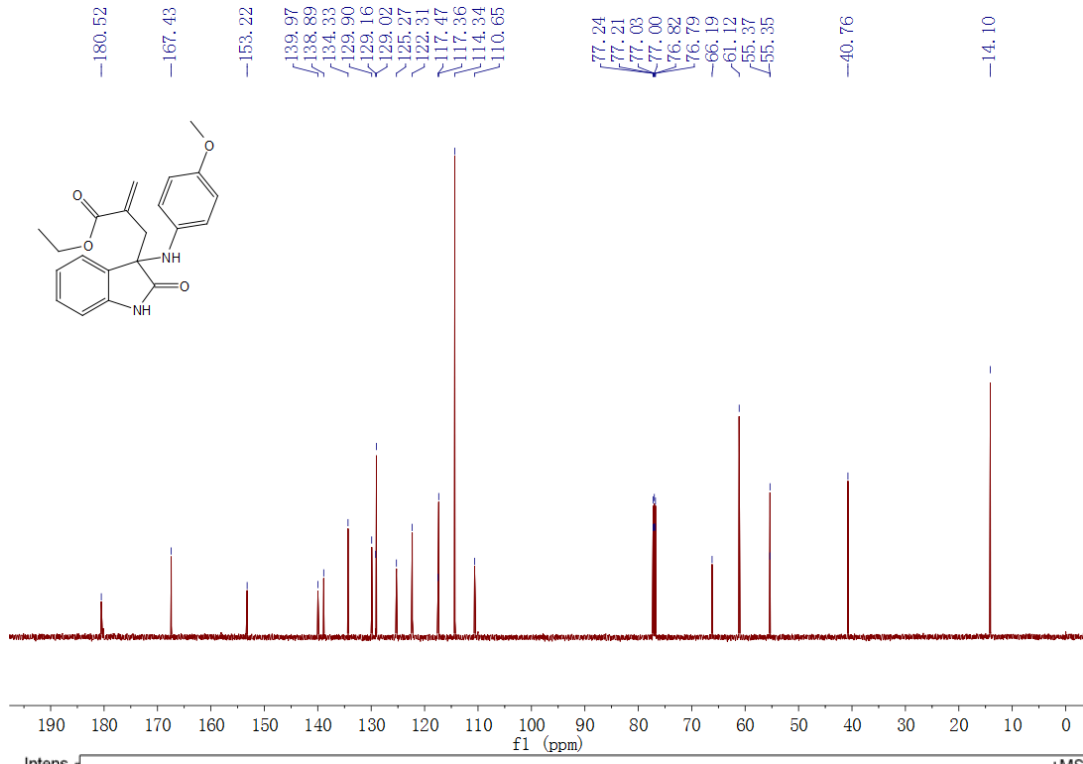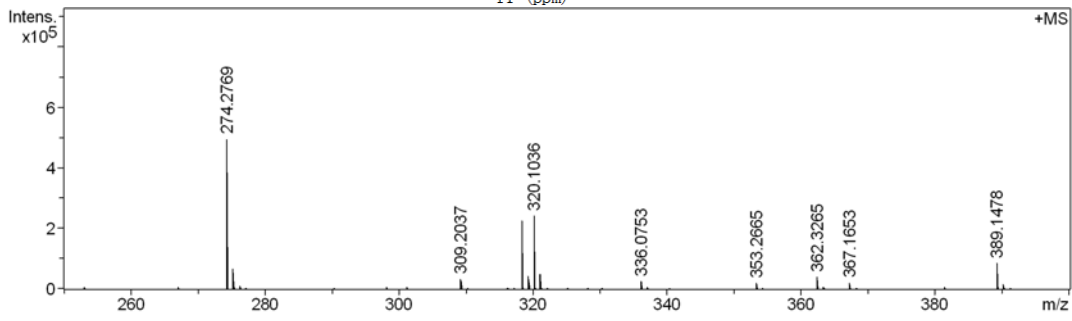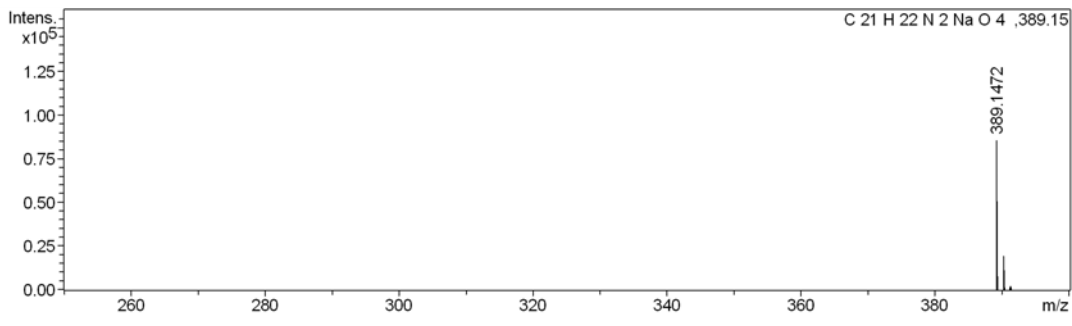

**Ethyl 2-((3-((2,6-dimethylphenyl)amino)-2-oxindolin-3-yl)methyl)acrylate(6f)**

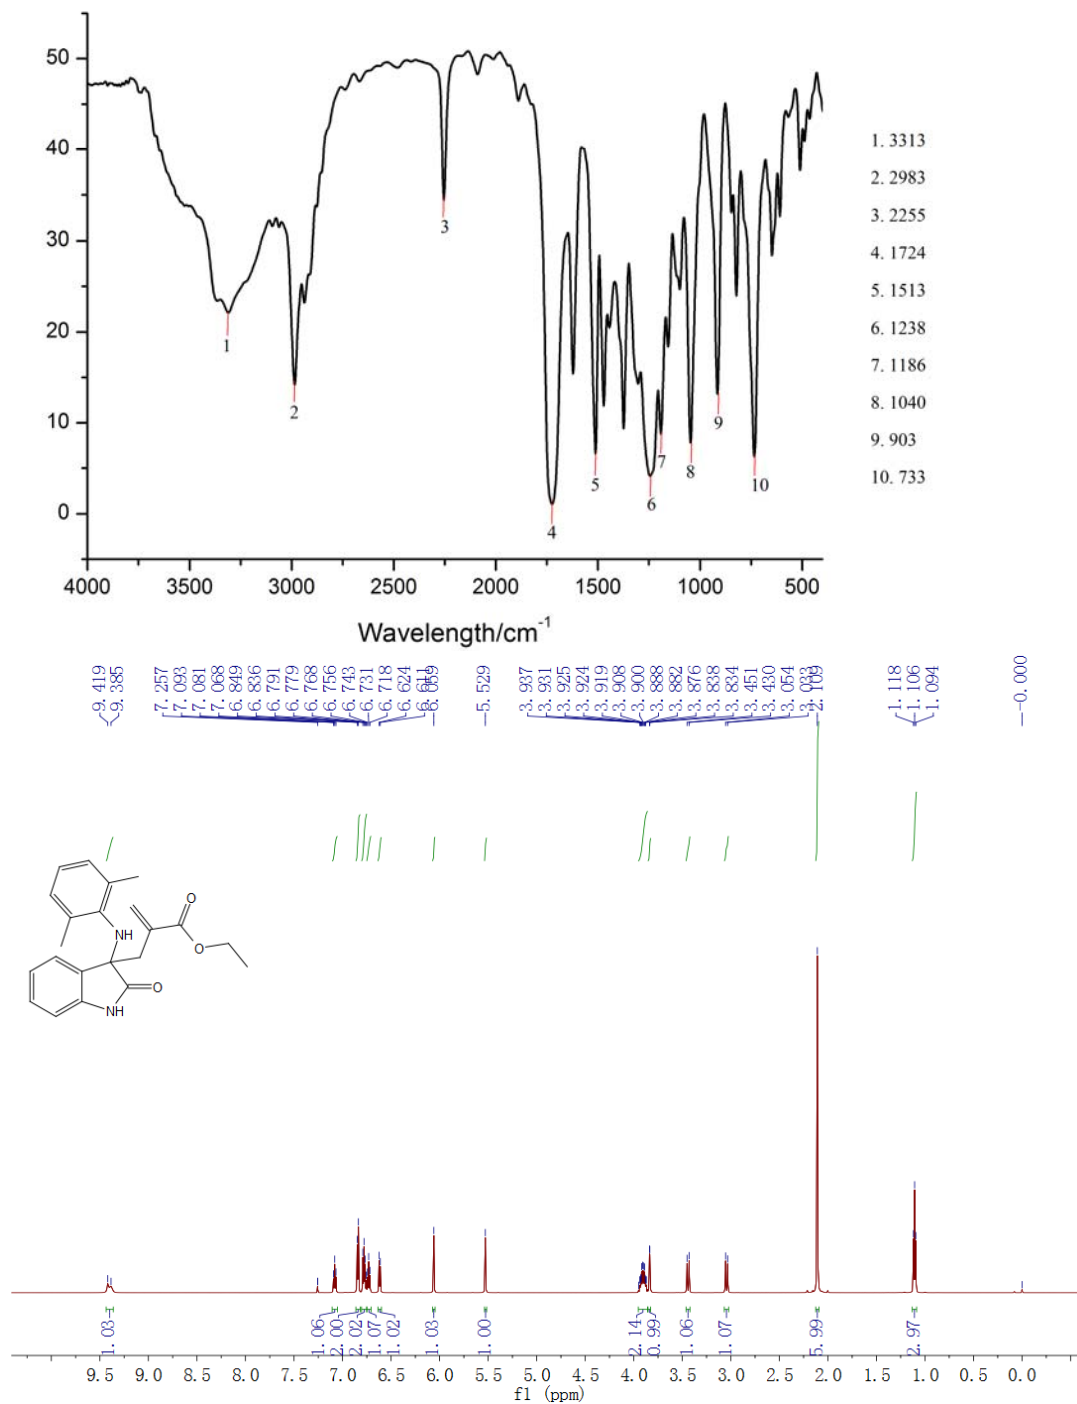

-180.78  
 -166.86  
 142.16  
 140.48  
 134.54  
 133.12  
 128.74  
 128.69  
 128.23  
 127.91  
 126.31  
 123.37  
 121.46  
 -109.96  
 77.21  
 77.00  
 76.79  
 -67.93  
 -60.70  
 -42.11  
 -19.18  
 -13.92

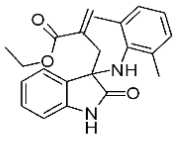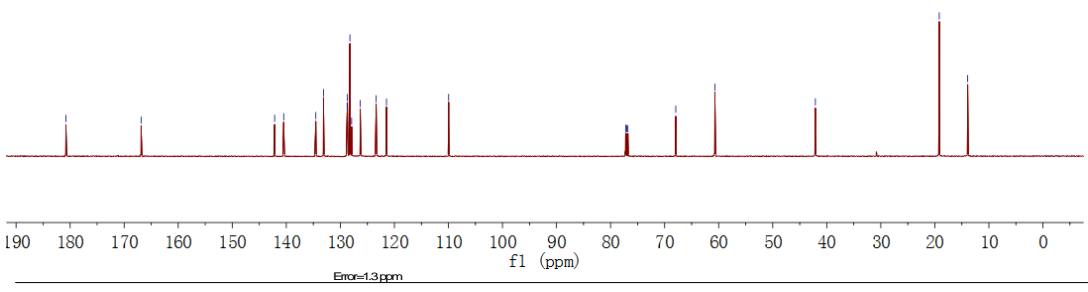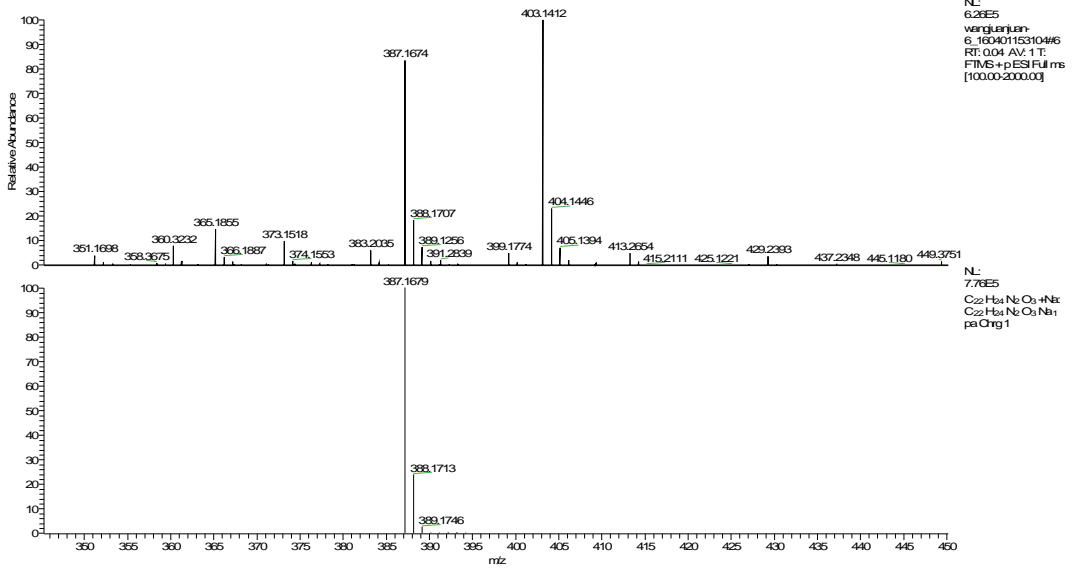

# Ethyl 2-((3-((4-fluorophenyl)amino)-2-oxindolin-3-yl)methyl)acrylate(6h)

样品名称:

日期:2016年05月16日

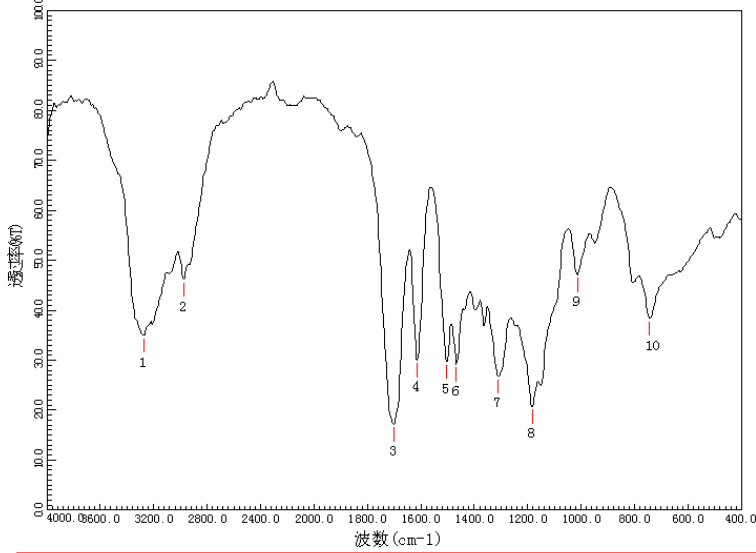

| 序号 | 波数 (cm-1) | 峰值   |
|----|-----------|------|
| 1  | 3274.0    | 35.0 |
| 2  | 2974.0    | 46.1 |
| 3  | 1701.0    | 17.1 |
| 4  | 1614.0    | 30.0 |
| 5  | 1503.0    | 28.7 |
| 6  | 1467.0    | 28.2 |
| 7  | 1311.0    | 26.8 |
| 8  | 1182.0    | 20.7 |
| 9  | 1014.0    | 47.2 |
| 10 | 744.0     | 38.4 |

测试条件: 间隔: 3.0cm-1 狭缝: 正常 响应: 正常 温度: 湿度:  
 仪器名称: WGH-30/6型双光束红外分光光度计 生产厂家: 天津市港东科技发展有限公司  
 测试单位: 测试人:

9.403 7.220 7.207 7.166 7.154 6.992 6.980 6.967 6.846 6.833 6.639 6.625 6.611 6.257 6.207 6.204 6.200 6.196 6.192 6.189 6.185 5.263 4.140 4.130 4.128 4.119 3.245 3.223 2.688 2.675 2.666 2.655 1.253 1.241 1.232 1.229 0.000

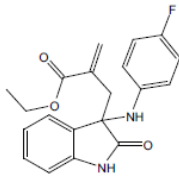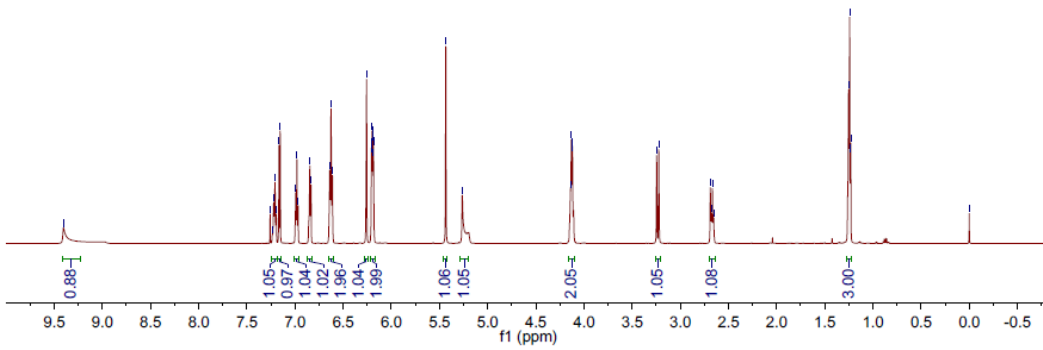



-180.27  
 -167.58  
 -157.24  
 -155.67  
 -141.44  
 -139.74  
 -134.02  
 -130.33  
 -129.17  
 -128.75  
 -125.06  
 -122.45  
 -115.99  
 -115.94  
 -115.46  
 -115.31  
 -110.79  
 -77.21  
 -77.00  
 -76.79  
 -65.70  
 -61.25  
 -40.97  
 -14.06

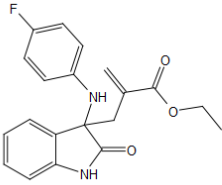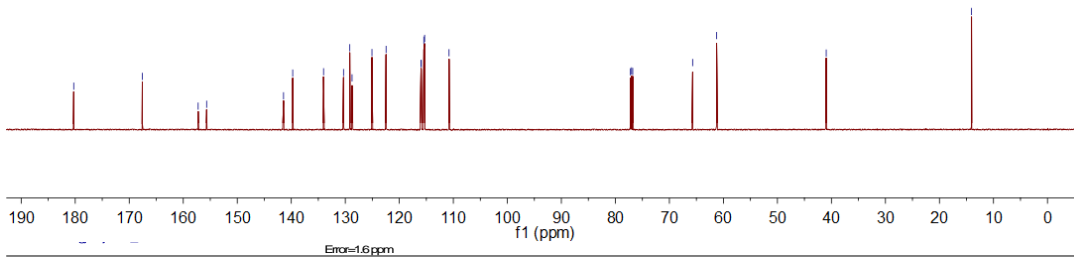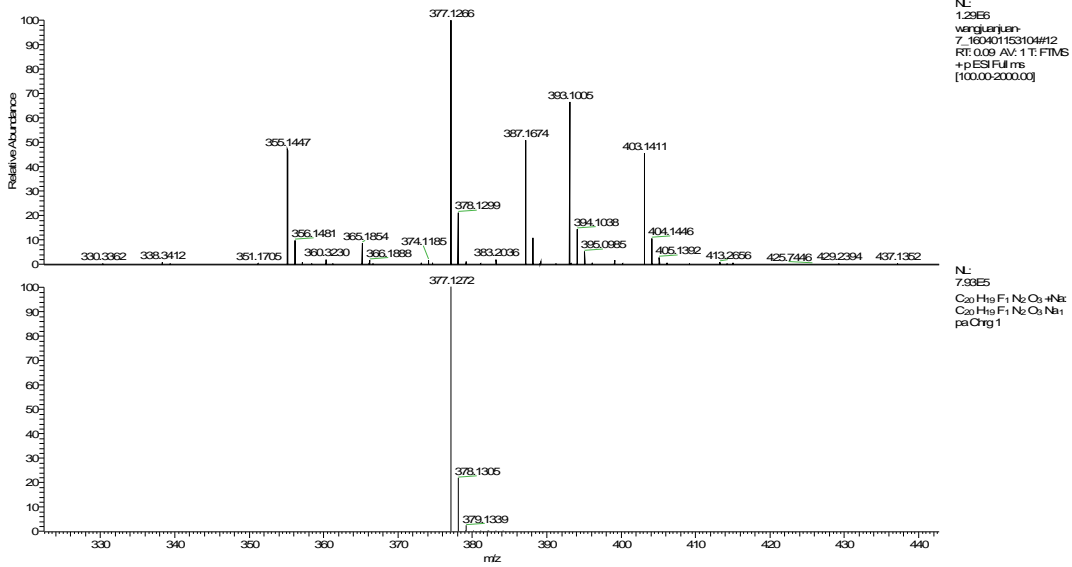

**Ethyl 2-((2-oxo-3-((4-(trifluoromethyl)phenyl)amino)indolin-3-yl)methyl)-acrylate(6i)**

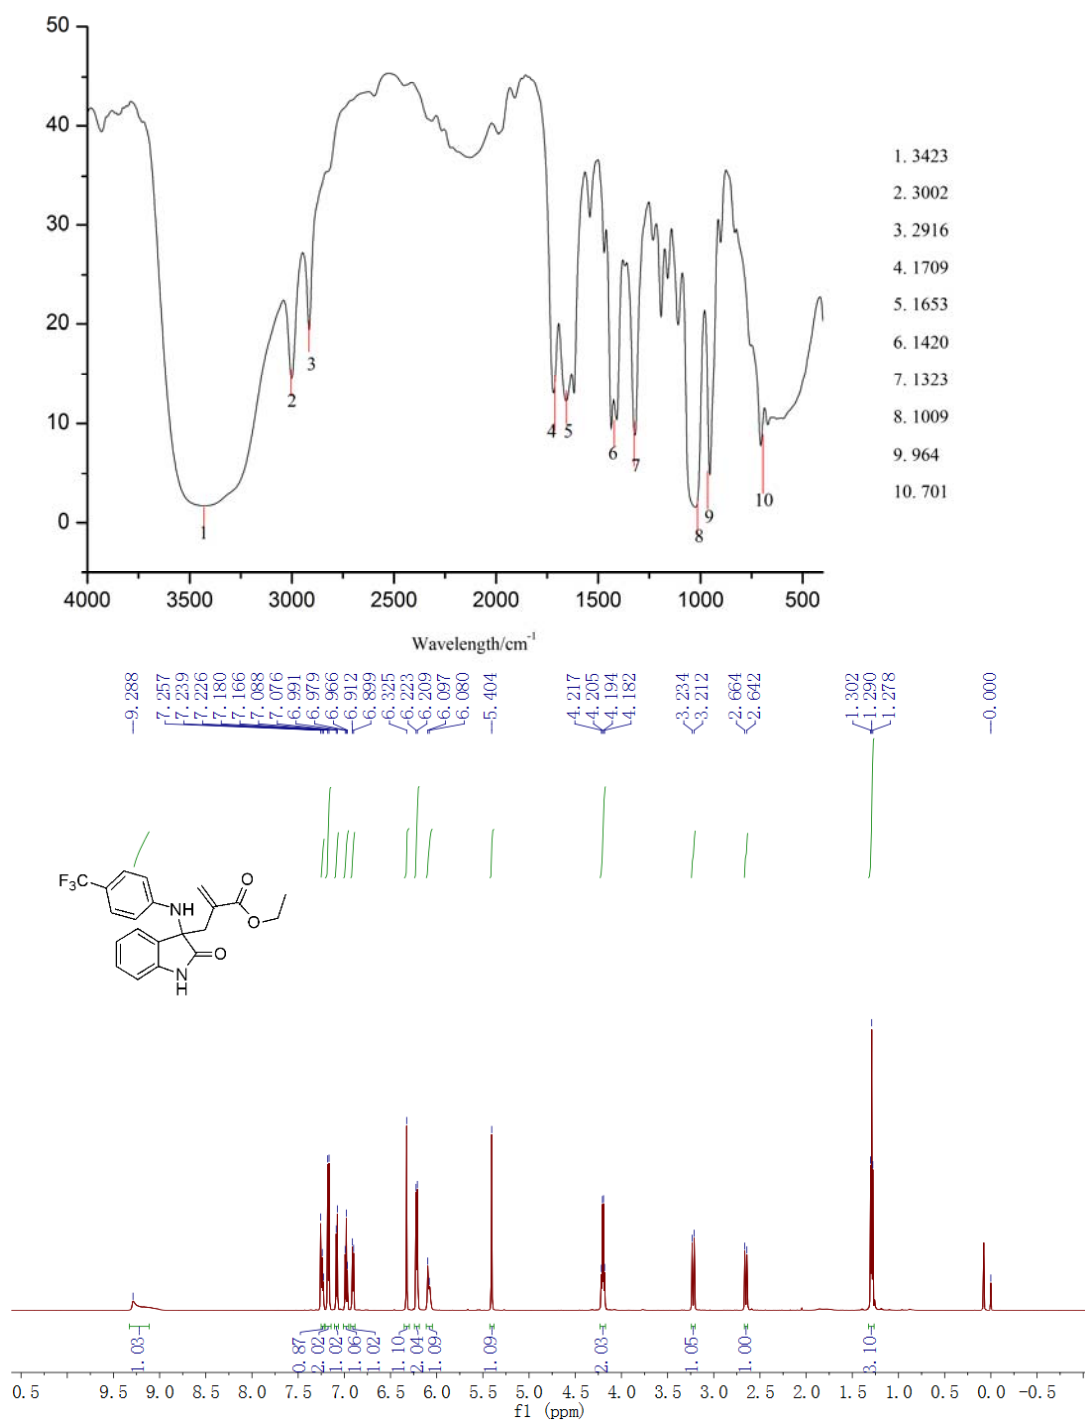

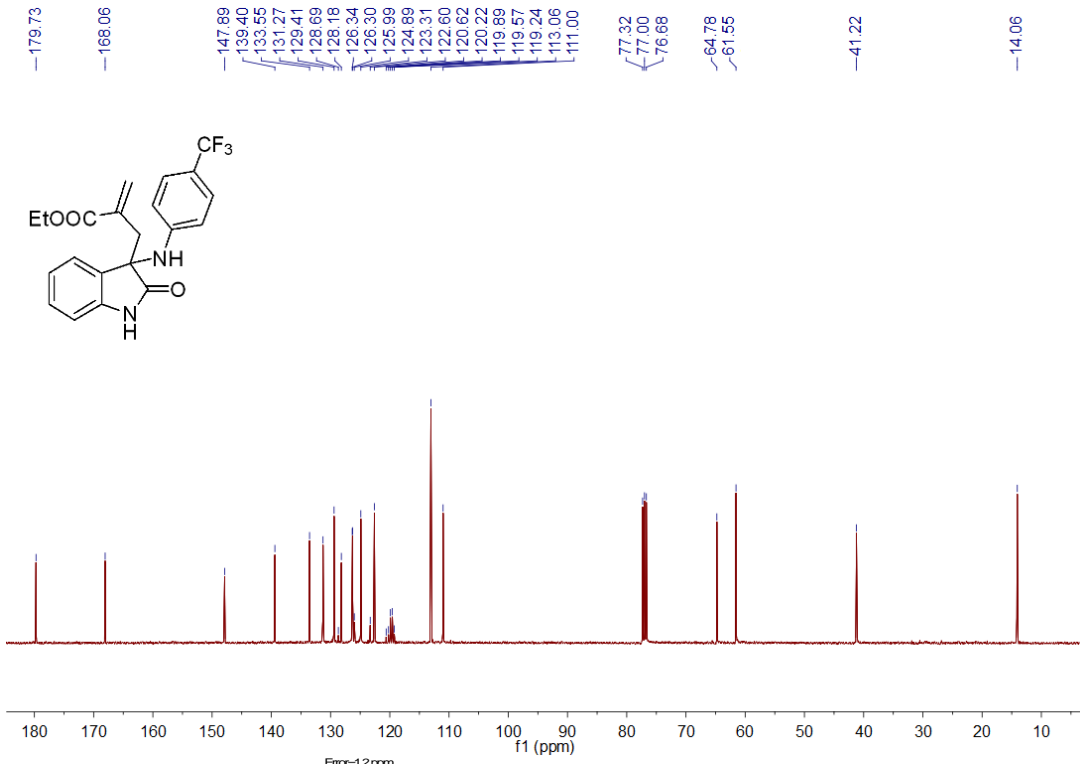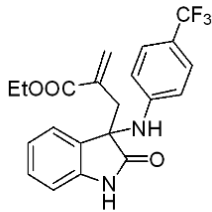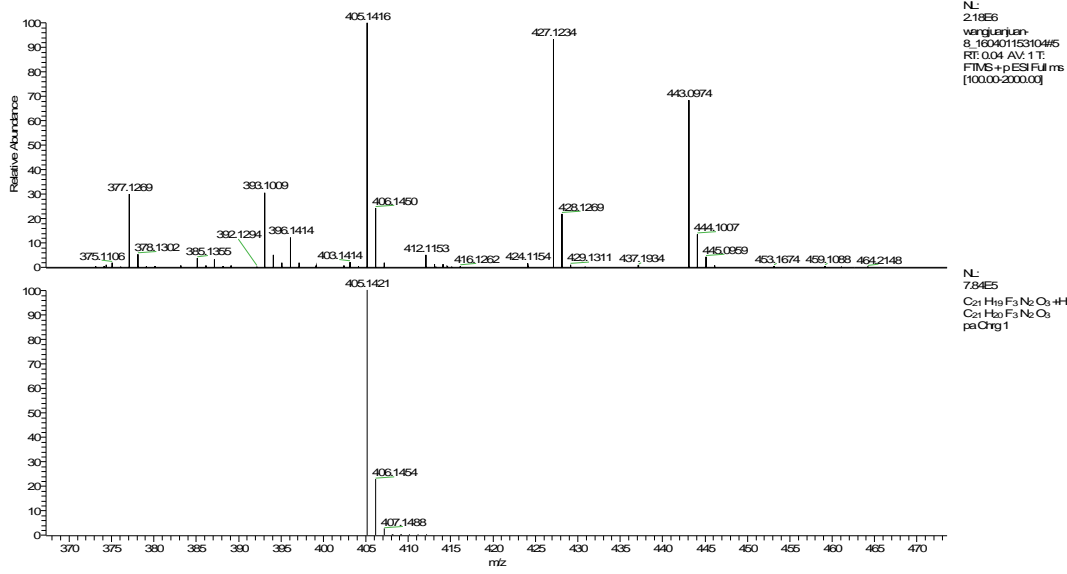

# Ethyl 2-((3-((4-chlorophenyl)amino)-2-oxindolin-3-yl)methyl)acrylate(6j)

样品名称:

日期:2016年05月16日

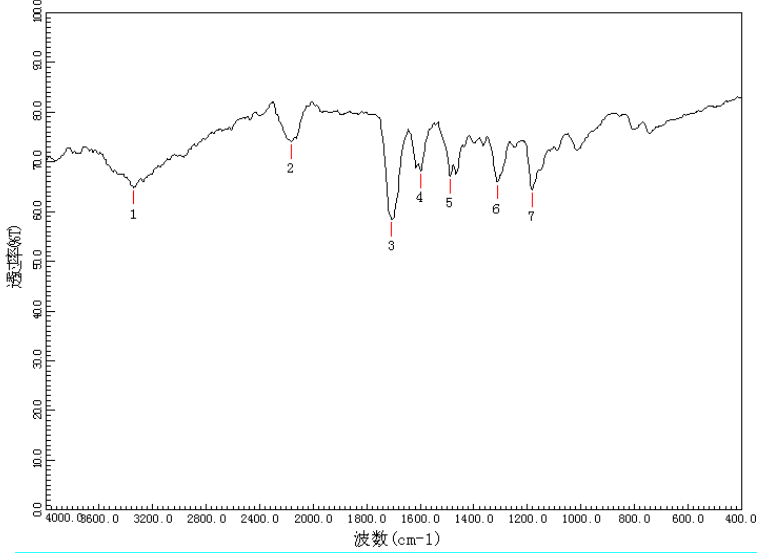

| 序号 | 波数(cm-1) | 峰值   |
|----|----------|------|
| 1  | 3340.0   | 64.9 |
| 2  | 2164.0   | 74.1 |
| 3  | 1707.0   | 58.5 |
| 4  | 1599.0   | 68.2 |
| 5  | 1488.0   | 67.1 |
| 6  | 1311.0   | 65.9 |
| 7  | 1182.0   | 64.4 |

测试条件: 间隔: 3.0cm-1 狭缝: 正常 响应: 正常 温度: 湿度:  
 仪器名称: WGH-30/6型双光束红外分光光度计 生产厂家: 天津市港泰科技发展有限公司  
 测试单位: 测试人:

9.550 7.256 7.255 7.224 7.212 7.199 7.116 7.104 6.981 6.969 6.956 6.886 6.882 6.845 6.831 6.281 6.192 6.137 5.596 5.419 4.167 4.155 4.144 4.132 3.230 3.207 2.674 2.651 1.268 1.256 1.244 -0.000

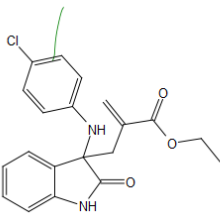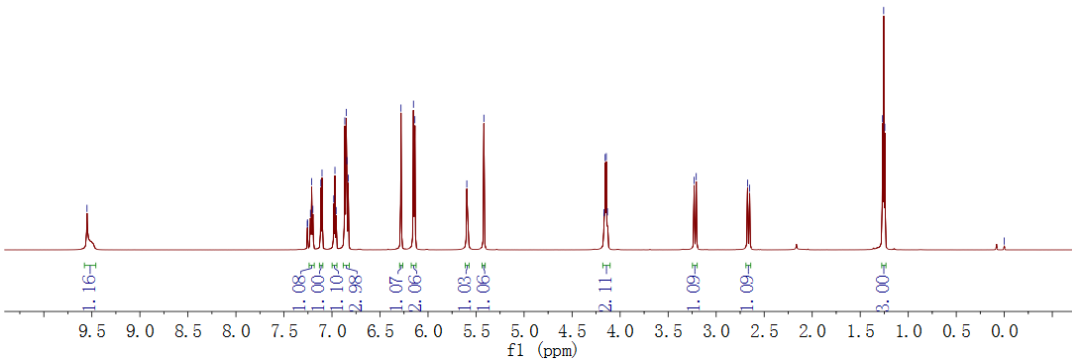

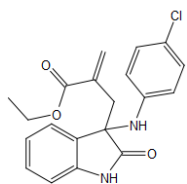

- 180.21
- 167.75
- 143.83
- 139.55
- 133.78
- 130.73
- 129.24
- 128.79
- 128.51
- 124.90
- 123.14
- 122.47
- 115.33
- 110.94
- 77.21
- 77.00
- 76.79
- 65.20
- 61.35
- 41.06
- 14.06

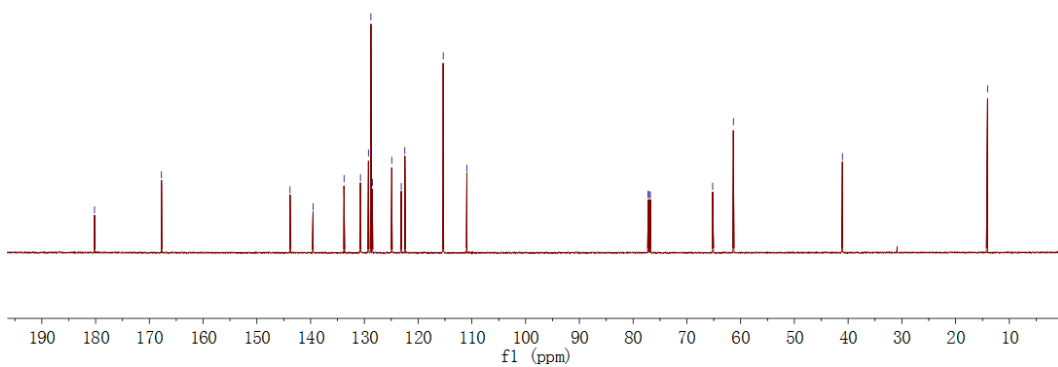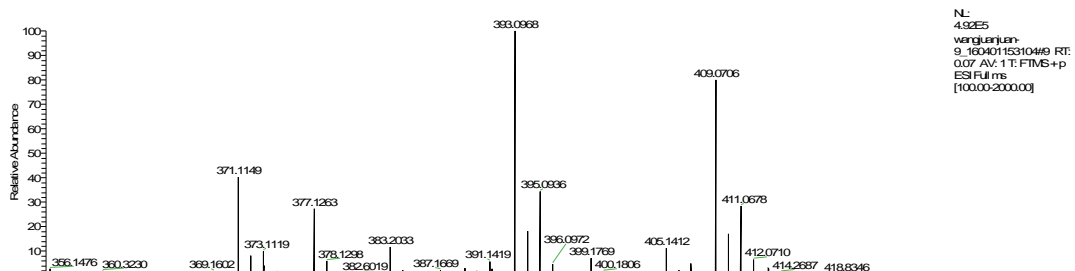

NL:  
4.92E5  
wangjun  
9\_16040153104#9 RT:  
0.07 AV:11: FIMS+p  
ESI Full ms  
[100.00-2000.00]

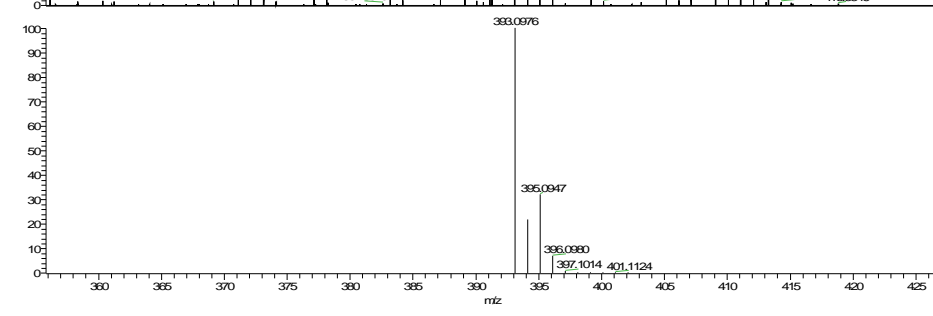

NL:  
6.01E5  
 $\text{C}_{20}\text{H}_{19}\text{Cl}_1\text{N}_2\text{O}_3\cdot\text{H}_2\text{O}$   
 $\text{C}_{20}\text{H}_{19}\text{Cl}_1\text{N}_2\text{O}_3\text{NH}$   
ps Chrg 1

# Ethyl 2-((3-((4-bromophenyl)amino)-2-oxoindolin-3-yl)methyl)acrylate(6k)

样品名称:

日期:2016年05月16日

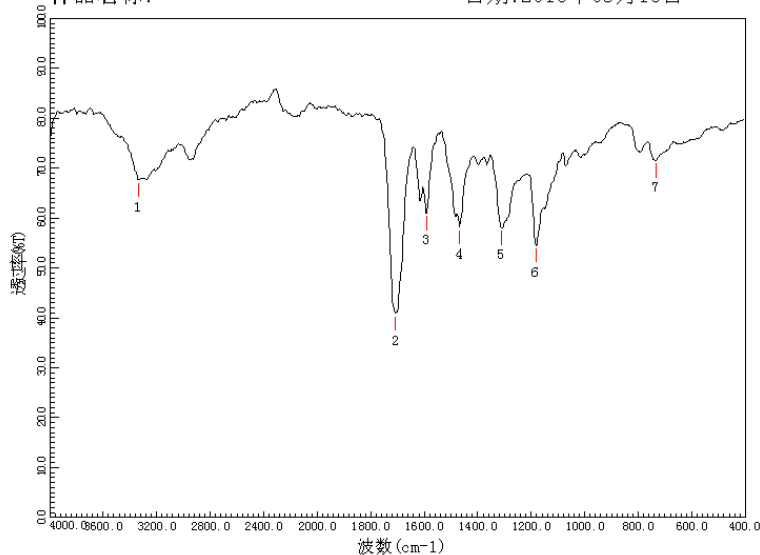

| 序号 | 波数 (cm <sup>-1</sup> ) | 峰值   |
|----|------------------------|------|
| 1  | 3334.0                 | 67.6 |
| 2  | 1707.0                 | 40.9 |
| 3  | 1590.0                 | 61.0 |
| 4  | 1467.0                 | 58.2 |
| 5  | 1311.0                 | 58.0 |
| 6  | 1182.0                 | 54.5 |
| 7  | 735.0                  | 71.6 |

测试条件: 间隔: 3.0cm<sup>-1</sup> 狭缝: 正常 响应: 正常 温度: 湿度:  
 仪器名称: WGH-30/6型双光束红外分光光度计 生产厂家: 天津市港东科技发展有限公司  
 测试单位: 测试人:

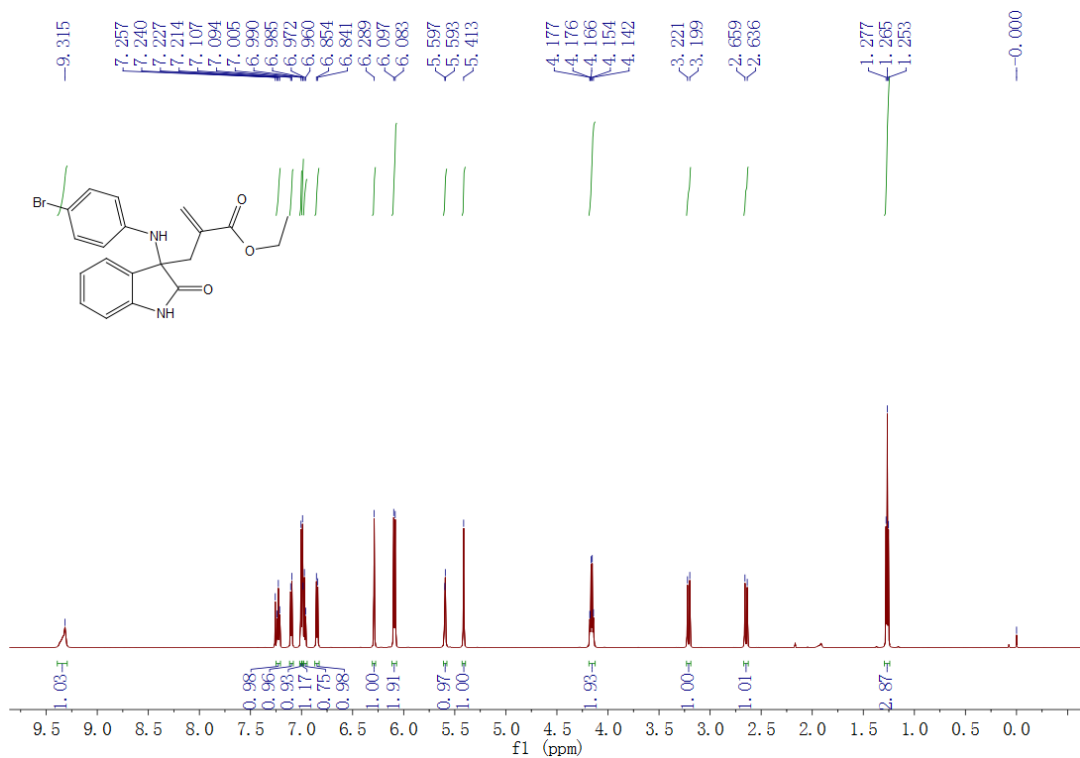

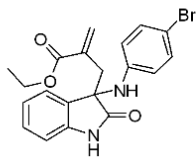

-180.09  
 -167.78  
 144.26  
 139.50  
 133.75  
 131.67  
 130.80  
 129.28  
 128.45  
 124.91  
 122.49  
 115.74  
 110.93  
 110.30  
 77.21  
 77.00  
 76.79  
 65.09  
 61.37  
 41.09  
 14.08

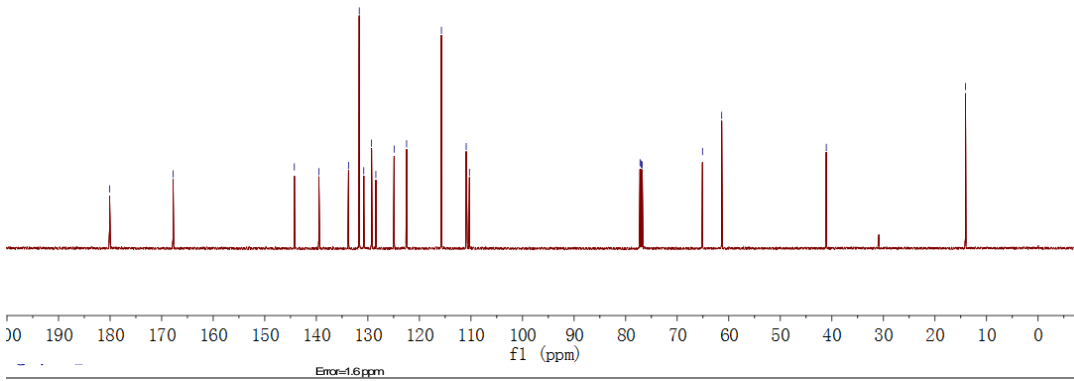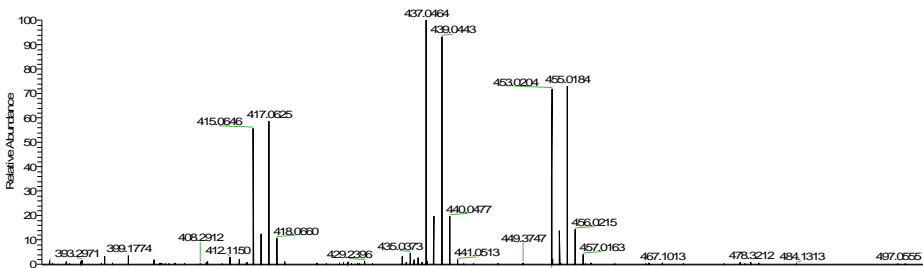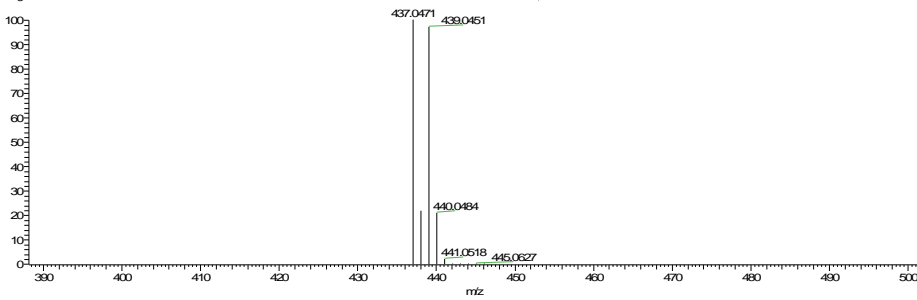

**Ethyl 2-((3-((4-fluorophenyl)amino)-5-methyl-2-oxindolin-3-yl)methyl)acrylate(6m)**

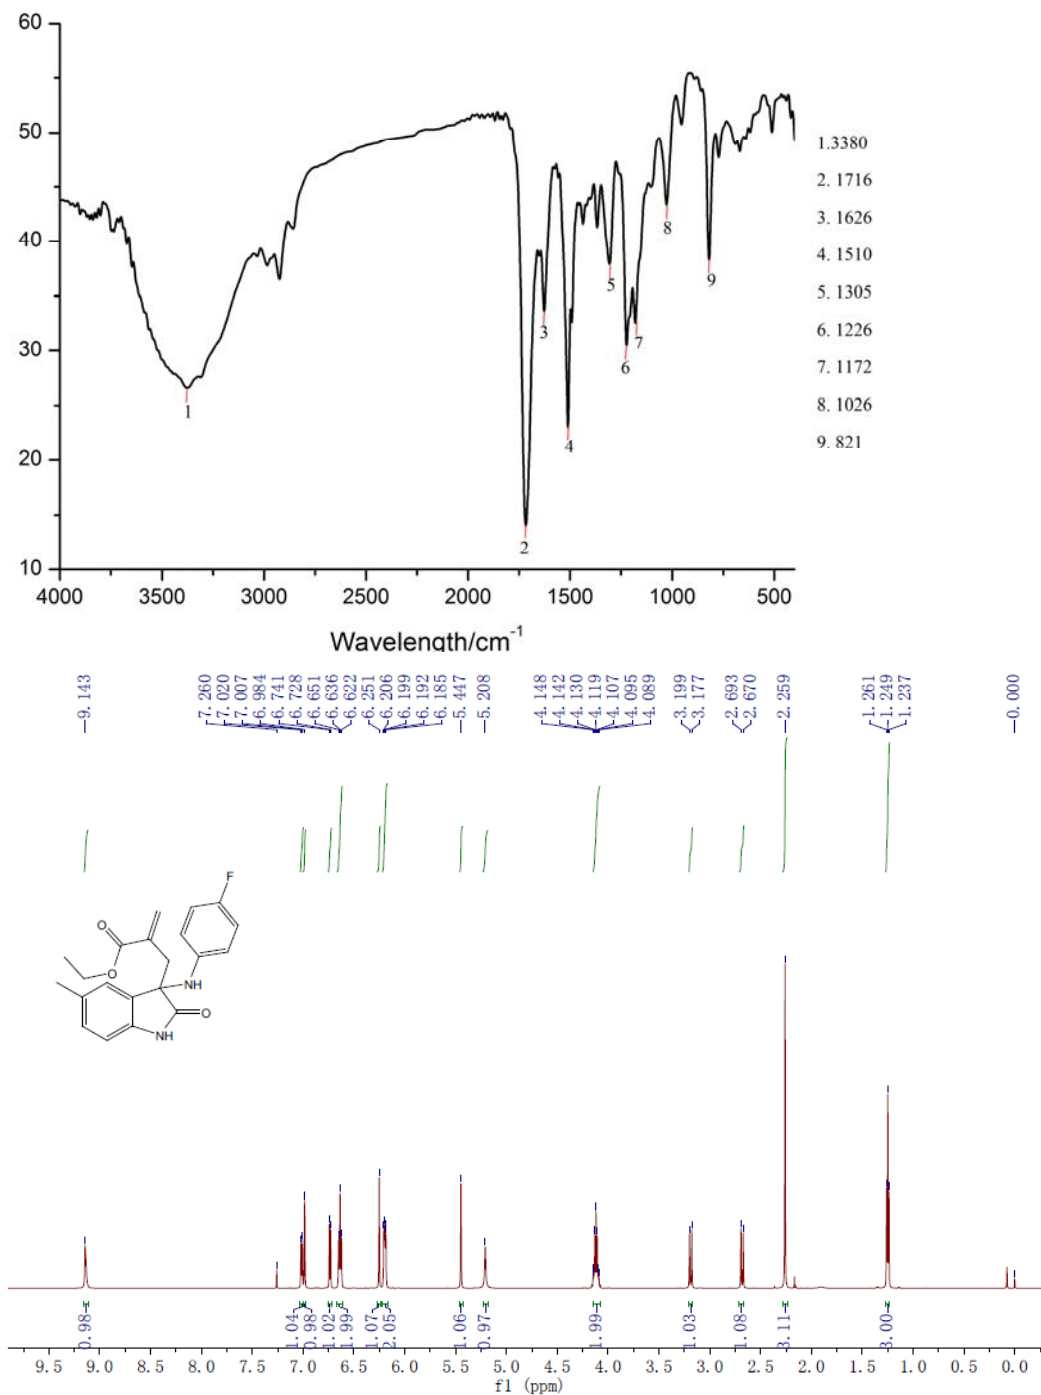



-179.12  
 -166.60  
 -156.22  
 -154.65  
 140.57  
 136.26  
 133.14  
 131.01  
 129.14  
 128.55  
 127.89  
 124.63  
 114.86  
 114.81  
 114.50  
 114.35  
 109.53  
 76.24  
 76.03  
 75.82  
 64.66  
 60.23  
 40.05  
 20.07  
 13.07  
 0.00

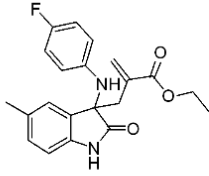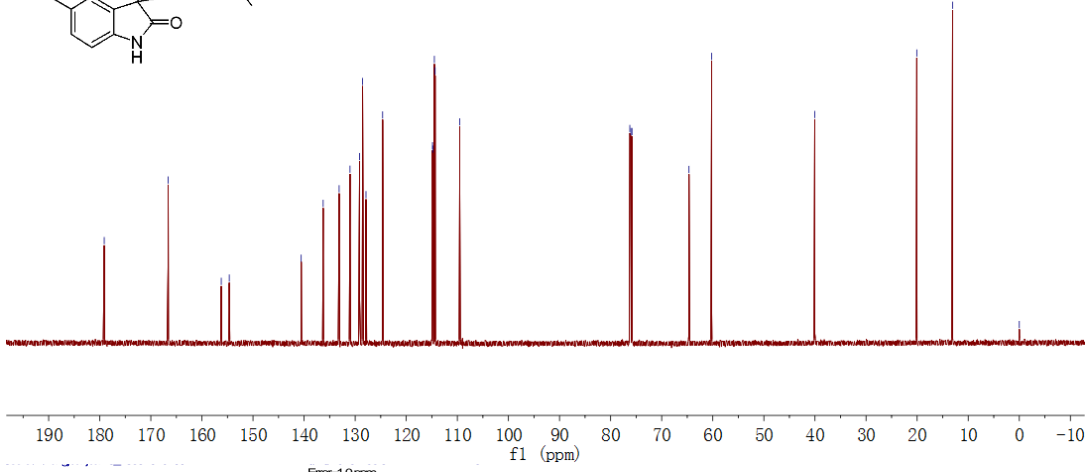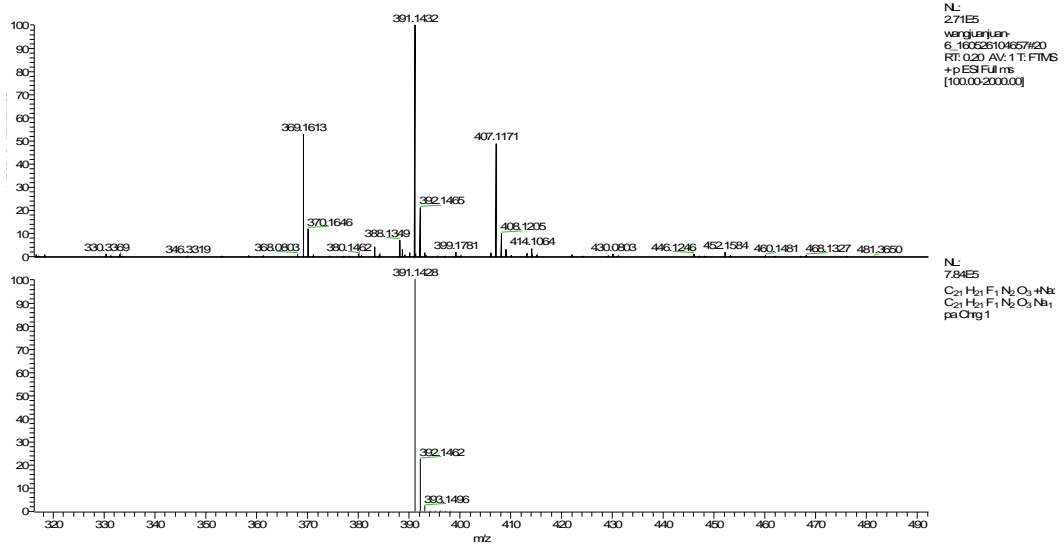

Ethyl 2-((5-chloro-3-((4-fluorophenyl)amino)-2-oxindolin-3-yl)methyl)acrylate(6n)

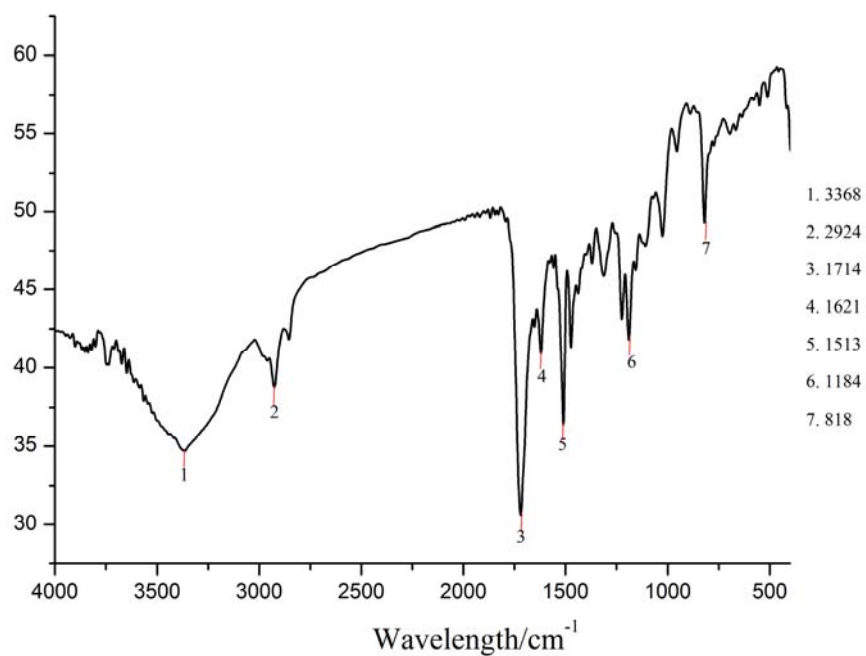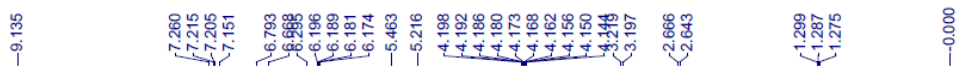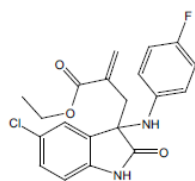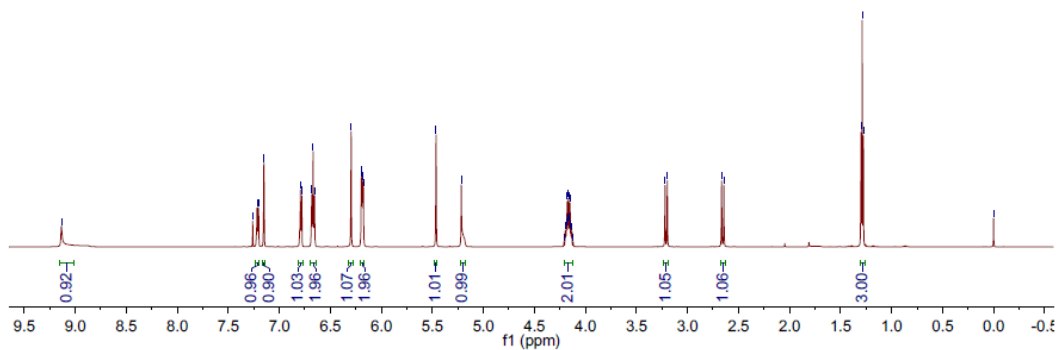

-179.71  
 -167.53  
 -157.43  
 -155.85  
 -141.08  
 -141.06  
 -138.15  
 -133.77  
 -130.66  
 -129.26  
 -128.73  
 -125.41  
 -115.92  
 -115.66  
 -115.51  
 -111.78  
 -77.21  
 -77.00  
 -76.79  
 -65.78  
 -61.51  
 -40.99  
 -14.07  
 -0.03

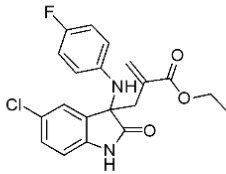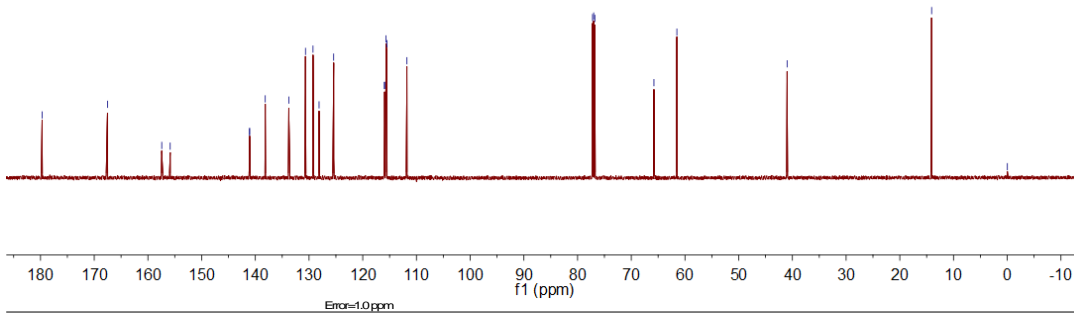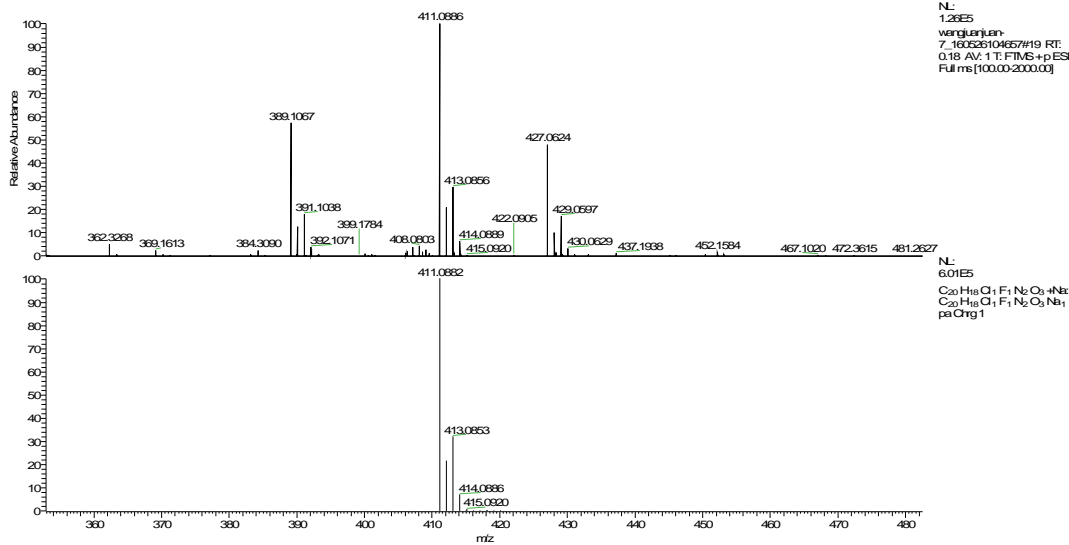

**Ethyl 2-((5-bromo-3-((4-fluorophenyl)amino)-2-oxindolin-3-yl)methyl)acrylate(6o)**

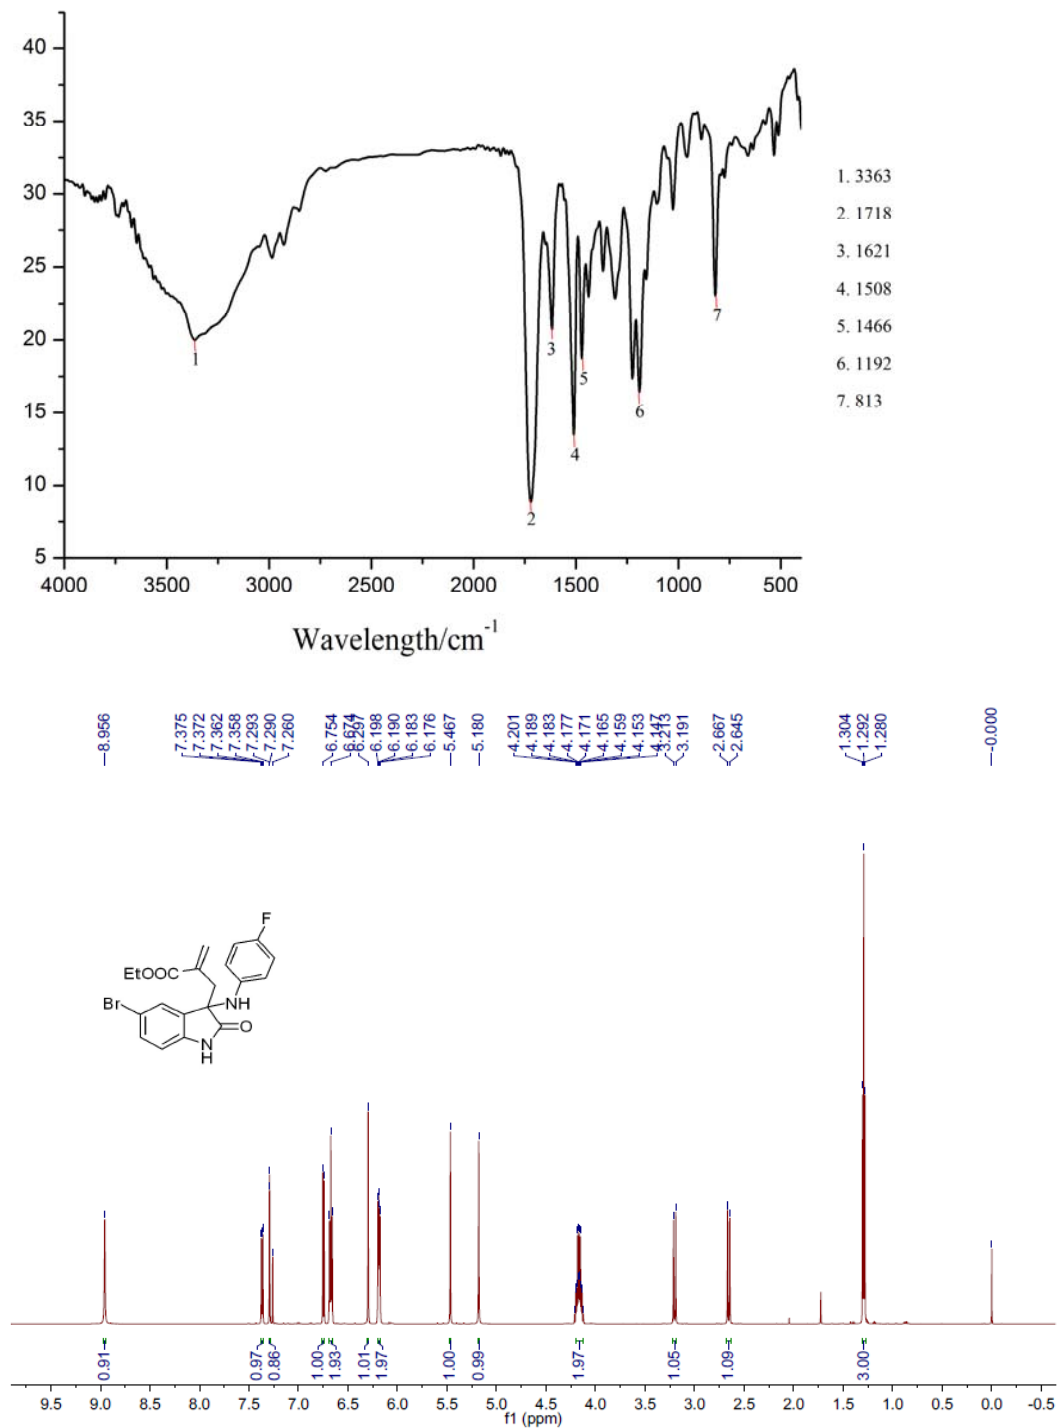

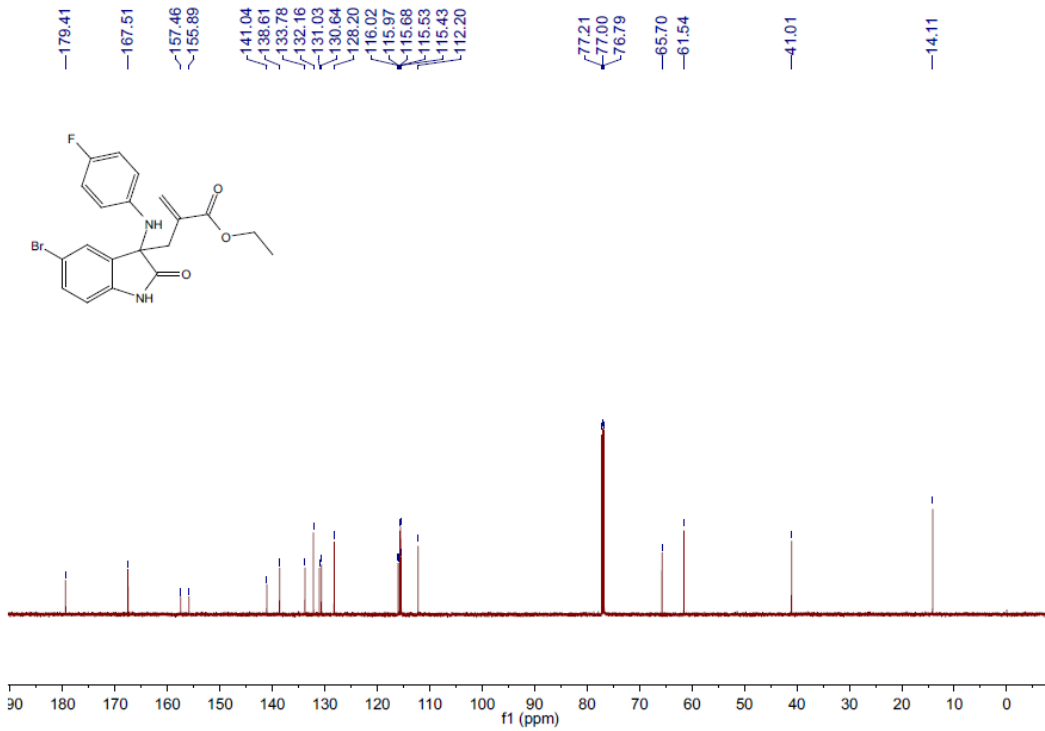

F:\Users\wangjun8\_160526104657

5/25/2016 4:20:39 PM  
Error=0.9 ppm

60

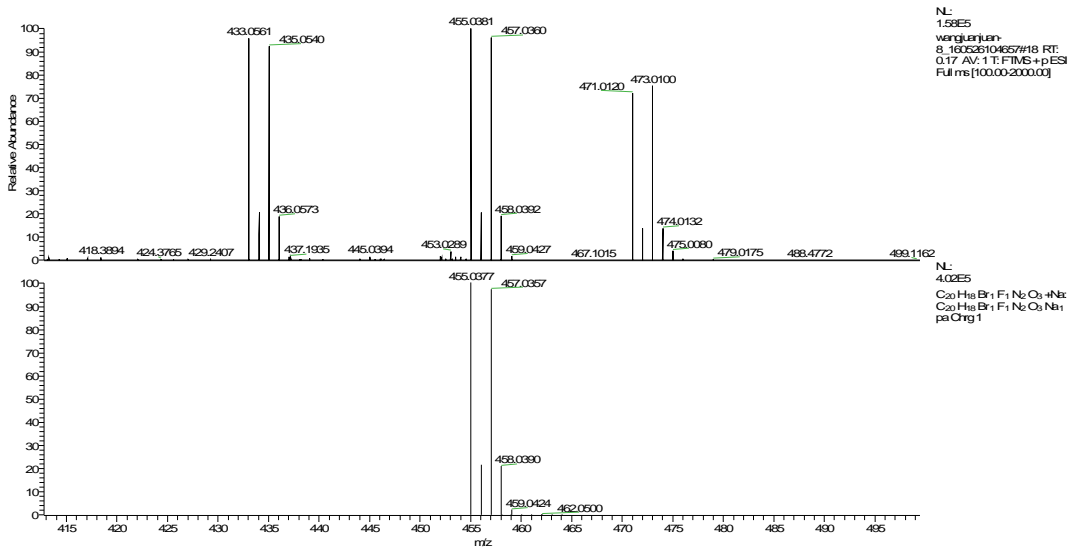

**Ethyl 2-((3-(naphthalen-2-ylamino)-2-oxoindolin-3-yl)methyl)acrylate(6p)**

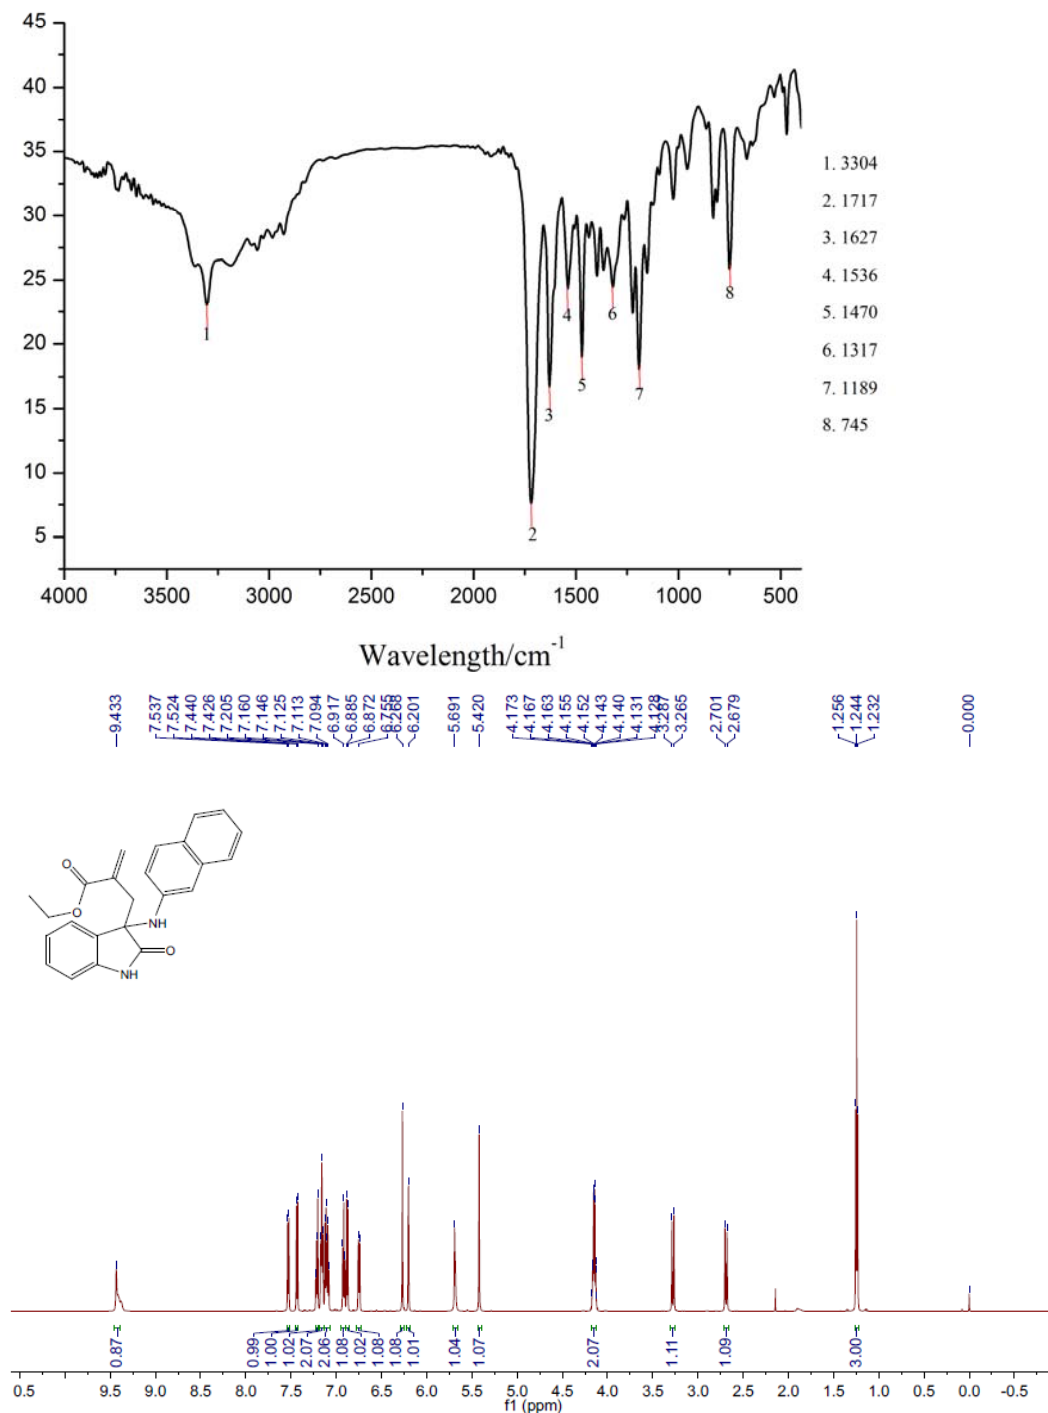

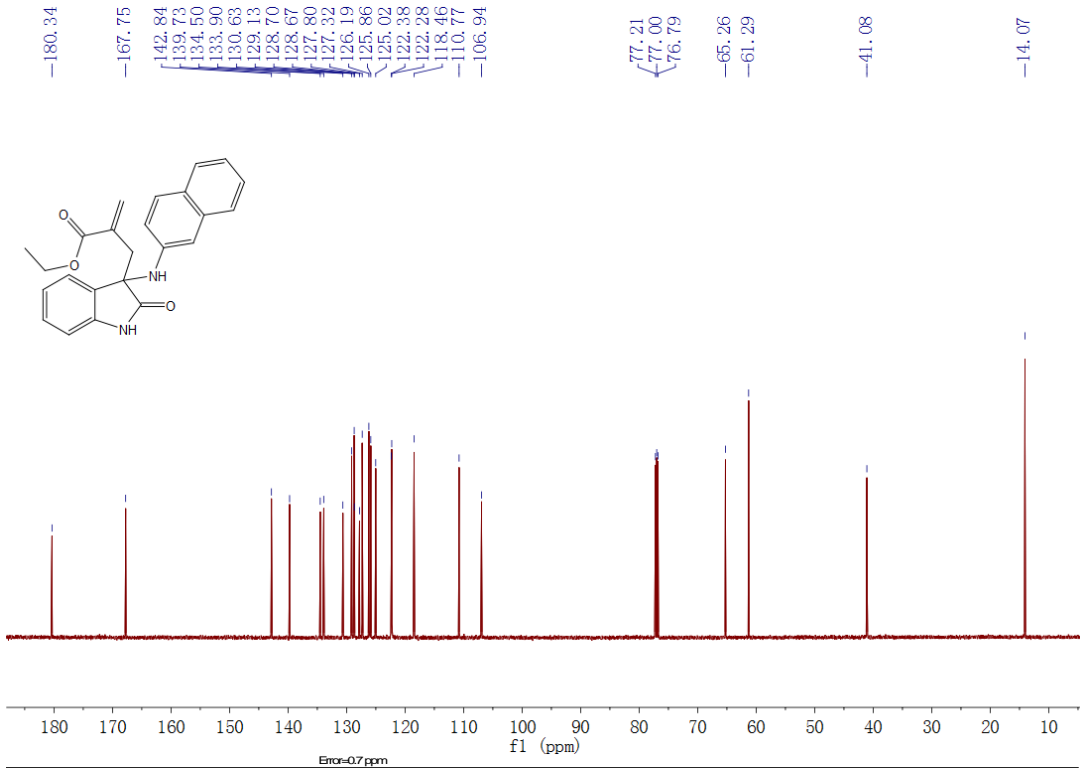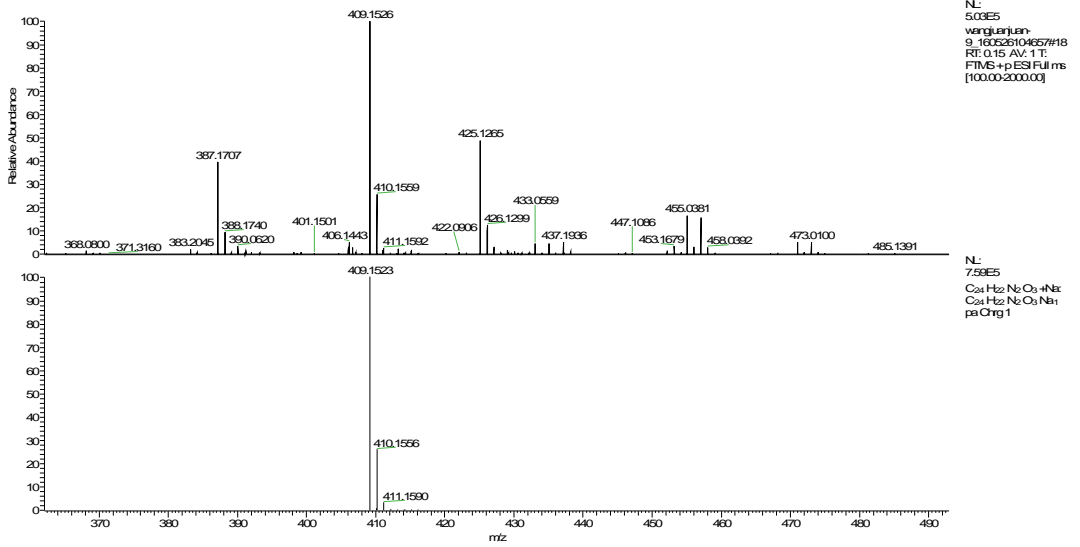

# Ethyl 2-((1-benzyl-3-((4-fluorophenyl)amino)-2-oxindolin-3-yl)methyl)acrylate(6q)

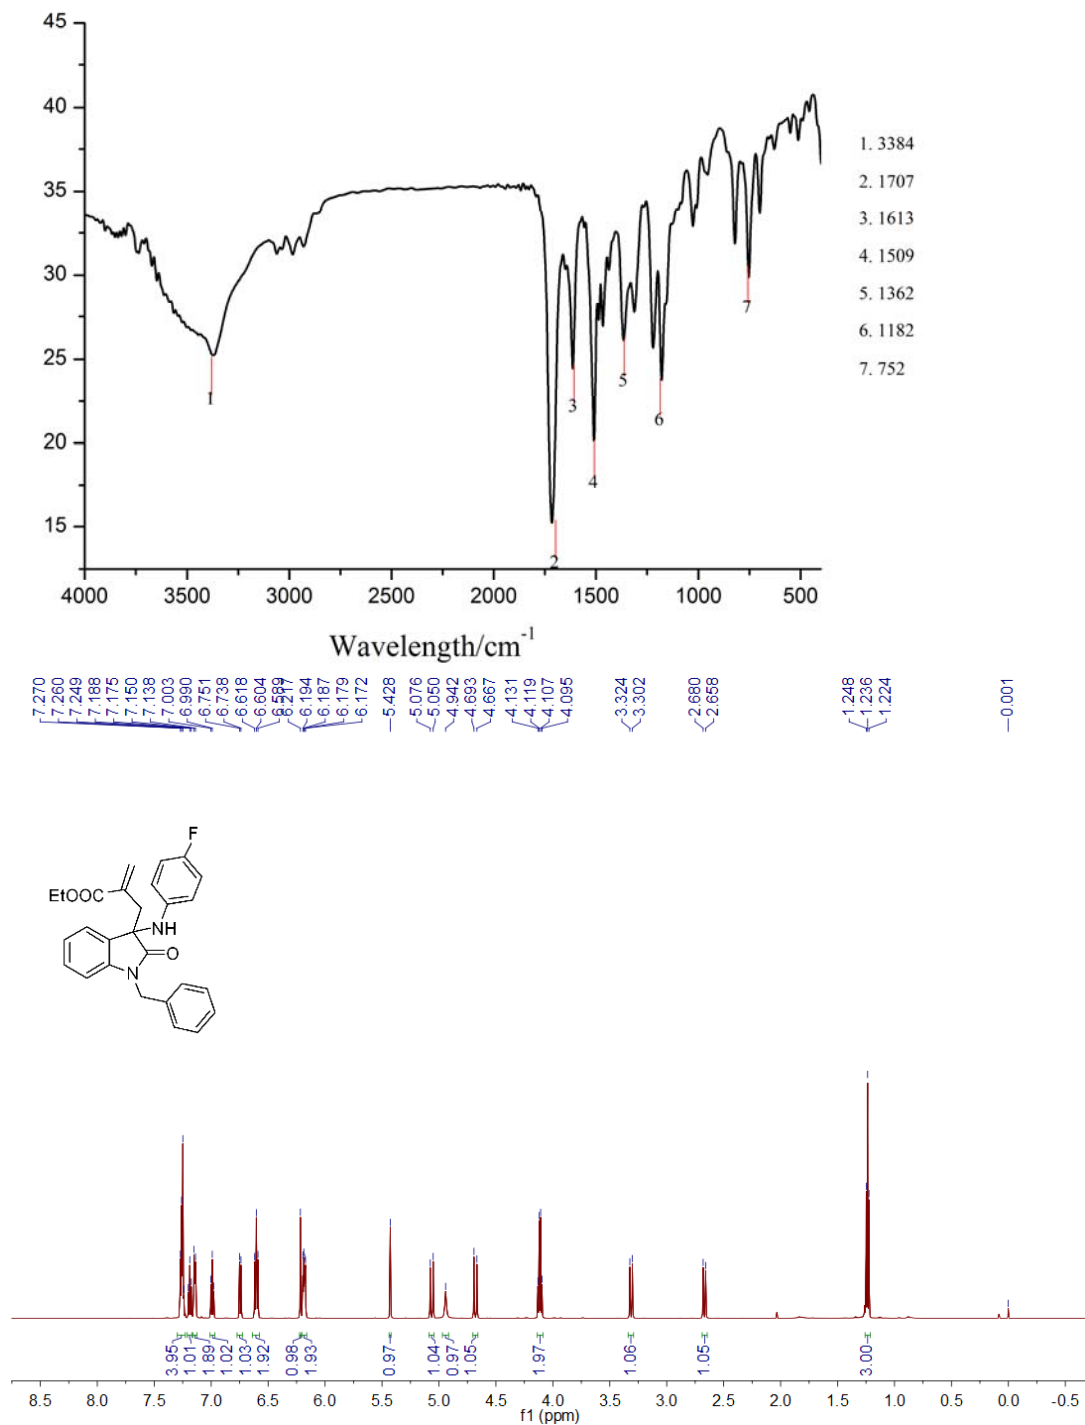



-177.17  
 -167.37  
 -157.81  
 -156.23  
 -141.92  
 -141.28  
 -135.45  
 -134.35  
 -129.92  
 -129.12  
 -128.58  
 -128.22  
 -127.63  
 -127.51  
 -125.10  
 -122.37  
 -117.89  
 -117.84  
 -115.35  
 -115.20  
 -109.58  
 -77.21  
 -77.00  
 -76.79  
 -65.61  
 -61.11  
 -43.90  
 -40.76  
 -14.07

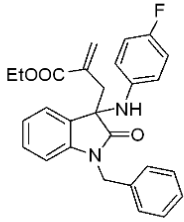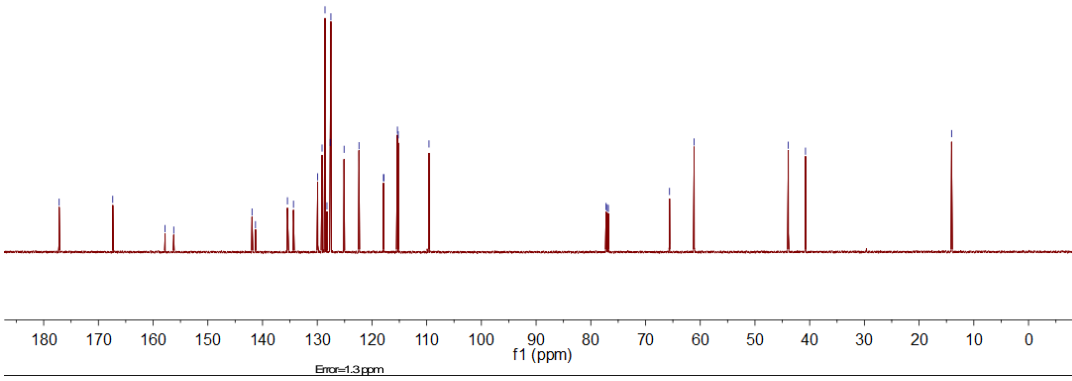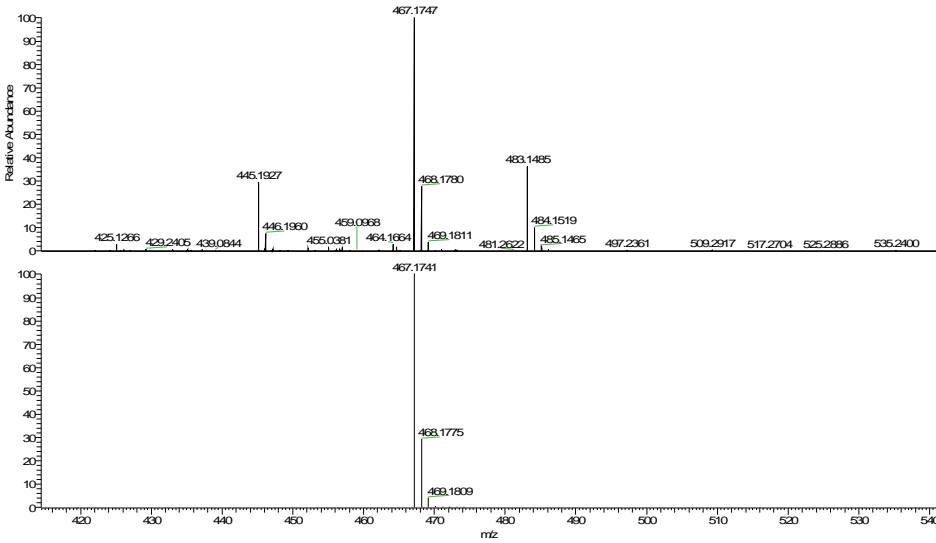

NL:  
 4.91E5  
 wangjunjun  
 10\_160328104657#11  
 RT: 0.10 AV: 1 T: FIMS  
 +pESI Full ms  
 [100.00:2000.00]

NL:  
 7.36E5  
 C<sub>27</sub>H<sub>25</sub>F<sub>1</sub>N<sub>2</sub>O<sub>2</sub>+Na<sup>+</sup>  
 C<sub>27</sub>H<sub>25</sub>F<sub>1</sub>N<sub>2</sub>O<sub>2</sub>Na<sup>+</sup>  
 ps C17g 1

**Ethyl 2-((1-ethyl-3-((4-fluorophenyl)amino)-2-oxoindolin-3-yl)methyl)acrylate(6r)**

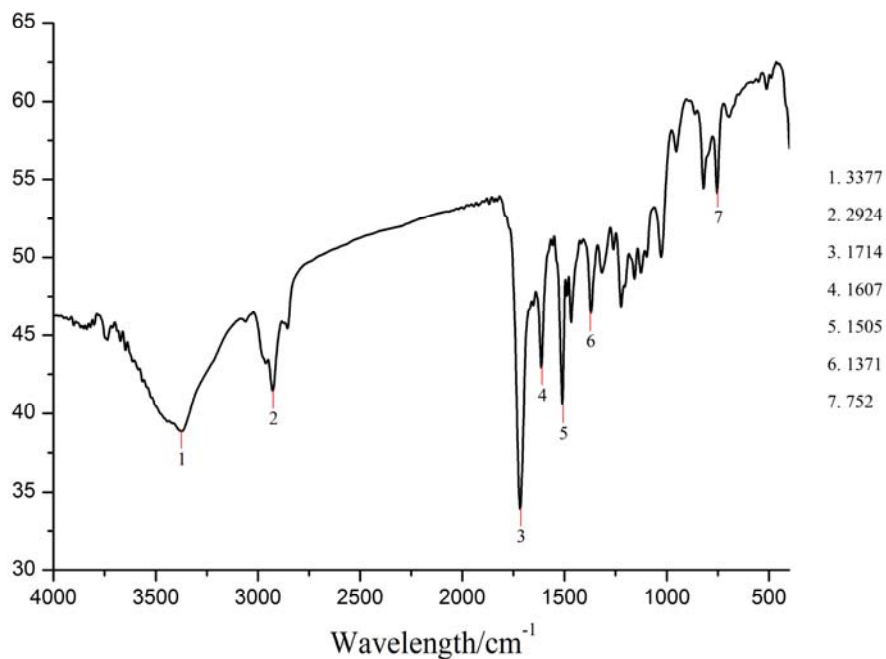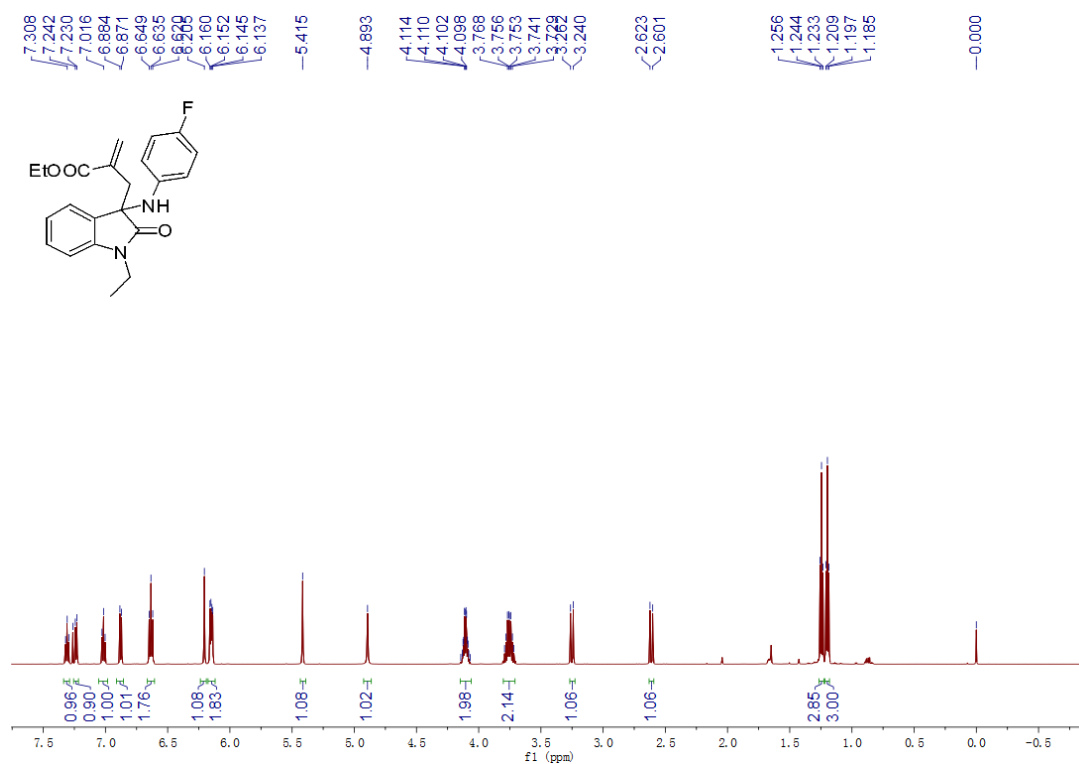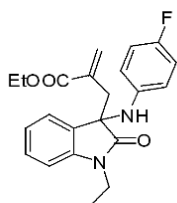

-176.74  
 -167.39  
 -157.54  
 -155.96  
 -141.83  
 -141.41  
 -134.32  
 -129.86  
 -129.20  
 -128.40  
 -125.25  
 -122.22  
 -116.87  
 -116.82  
 -115.34  
 -115.19  
 -108.64  
 77.21  
 77.00  
 76.79  
 -65.19  
 -61.11  
 -40.75  
 -34.73  
 -14.10  
 -12.50

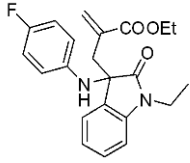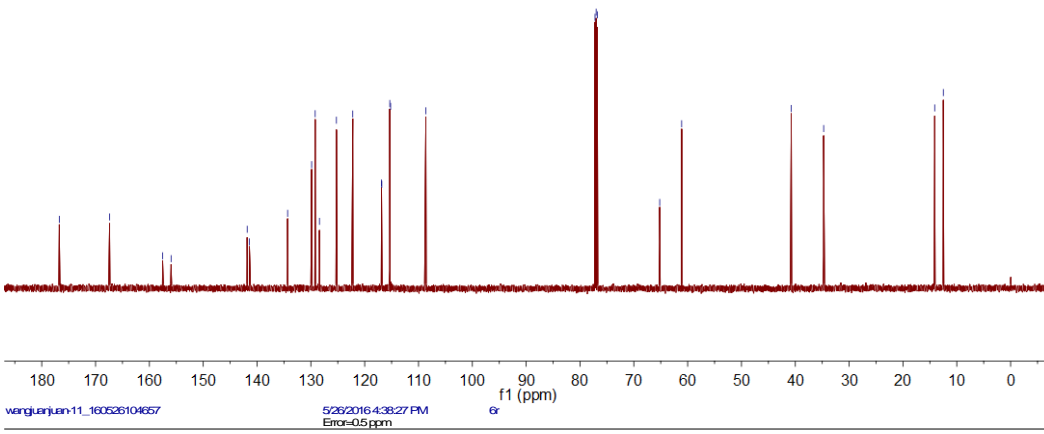

wangjun11\_160526104657

5/26/2016 4:38:27 PM  
Error=0.5 ppm

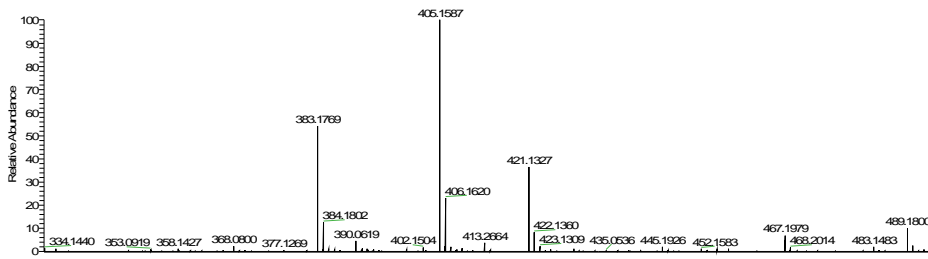

NL:  
 3.68E5  
 wangjun11\_160526104657#6  
 RT: 0.06 AV: 1 T: FTMS  
 +p-ESI Full ms  
 [100.00-2000.00]

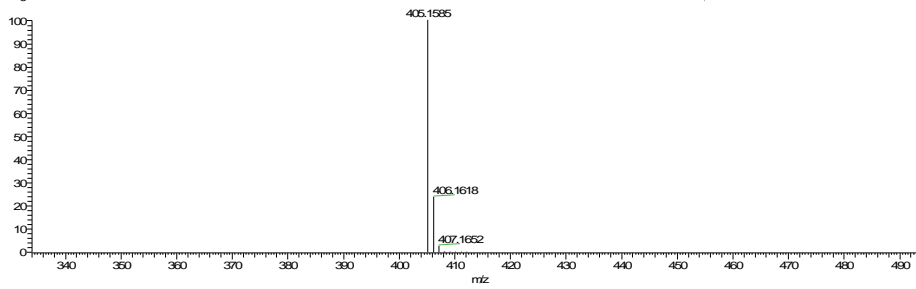

NL:  
 7.76E5  
 C22 H23 F1 N2 O3 +Na  
 C22 H23 F1 N2 O3 Na1  
 pa Chng 1

**Ethyl 2-((1-butyl-3-((4-fluorophenyl)amino)-2-oxindolin-3-yl)methyl)acrylate(6s)**

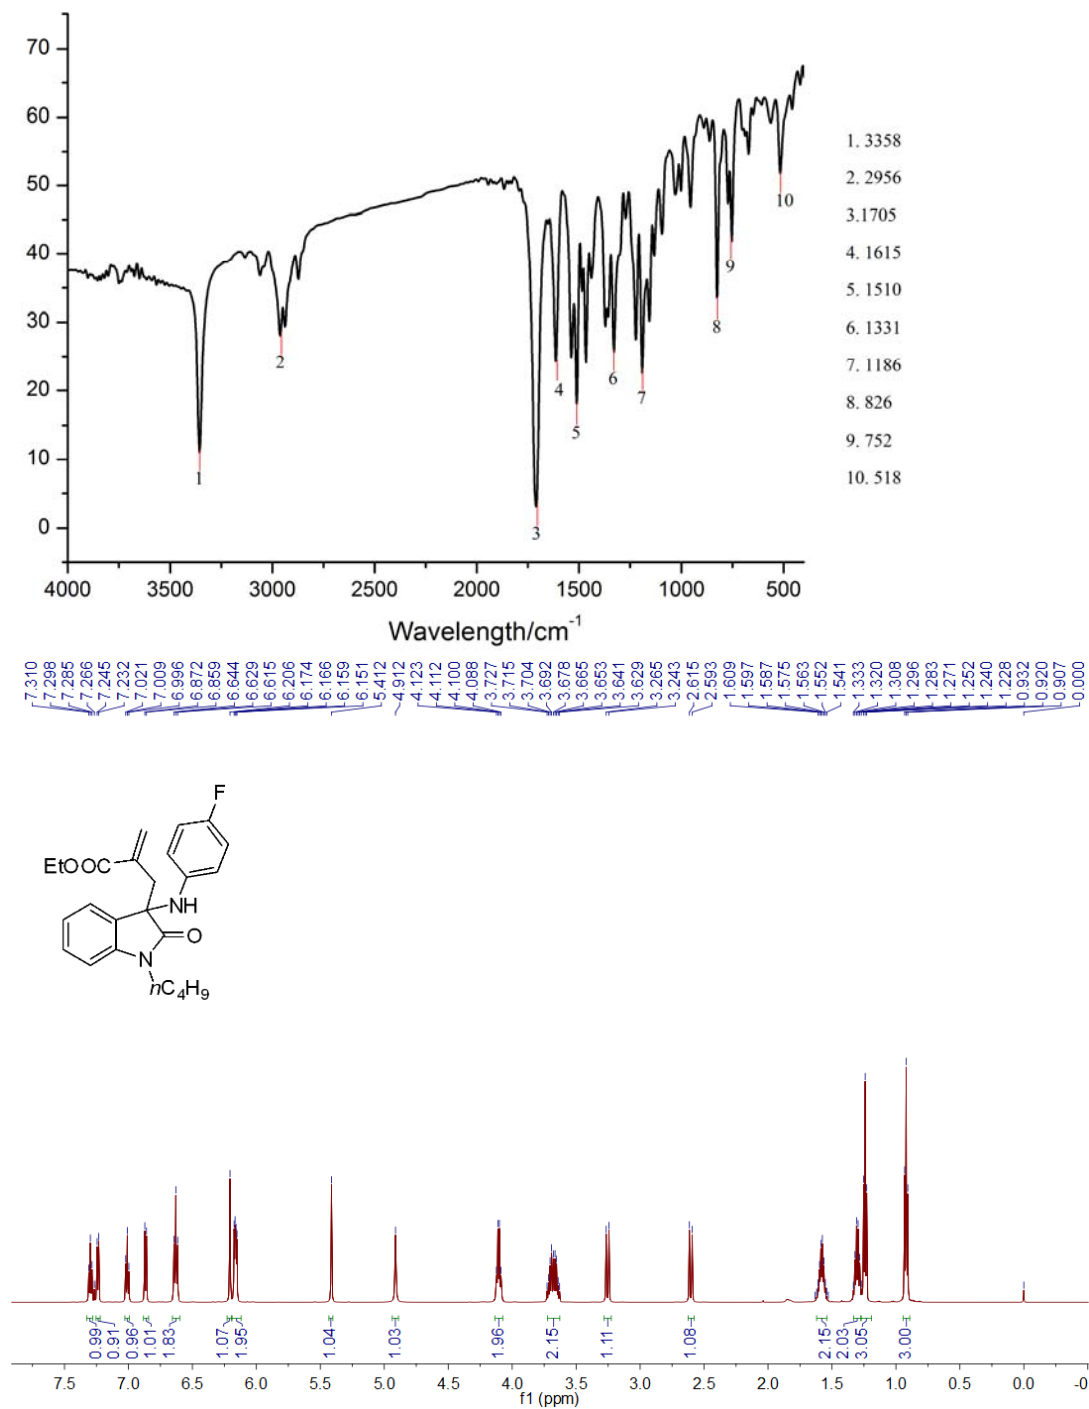

- 176.90
- 167.36
- 157.56
- 155.98
- 142.30
- 141.40
- 134.33
- 129.78
- 129.13
- 128.28
- 125.15
- 122.09
- 117.10
- 117.05
- 115.25
- 115.10
- 108.72
- 77.21
- 77.00
- 76.79
- 65.27
- 61.06
- 40.74
- 39.84
- 29.43
- 20.12
- 14.05
- 13.65

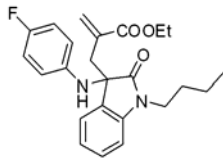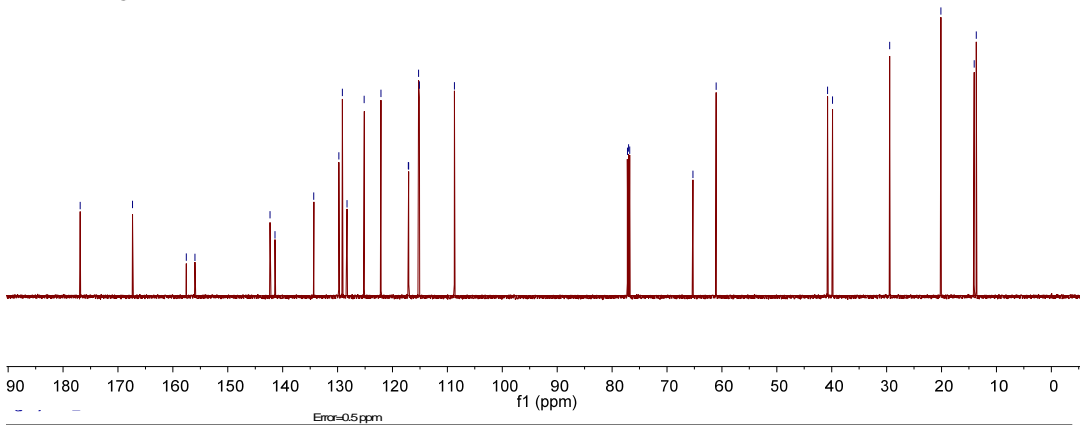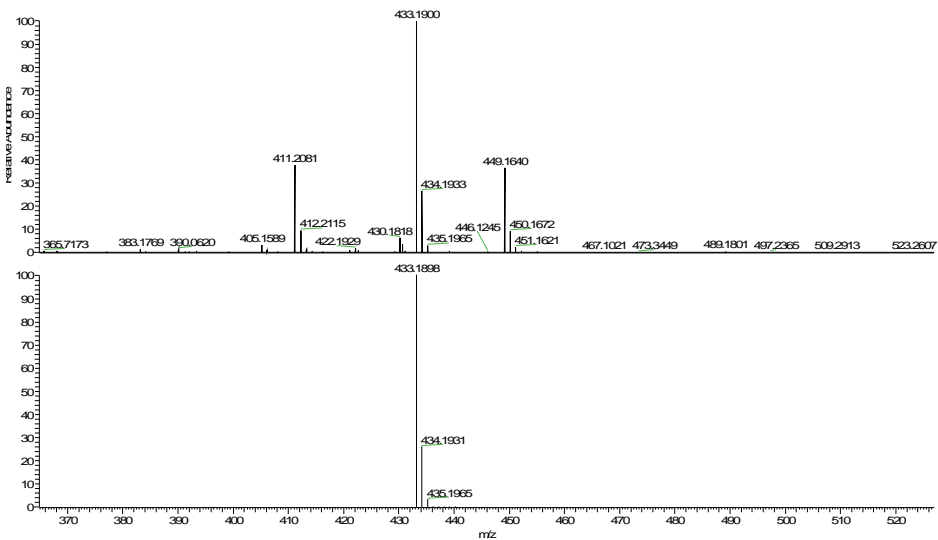

Supplement: c6ob01487a1.pdf [file c6ob01487a1.pdf]
